1 **Title page**

2 **Title:**  $\beta$ -arrestin-dependent ERK signaling positively correlates with reduced anxiety-like and  
3 conditioned fear-related behavior in mice

4

5 **Authors:** Mee Jung Ko<sup>1,3,4</sup>, Terrance Chiang<sup>1</sup>, Arbaaz M. Mukadam<sup>1</sup>, Grace E. Mulia<sup>1</sup>, Anna  
6 M. Guttridge<sup>1,3</sup>, Julia A. Chester<sup>2,3,4</sup>, Richard M. van Rijn<sup>1,3,4,5†\*</sup>

7

8 **Author footnotes:**

9 <sup>1</sup>Department of Medicinal Chemistry and Molecular Pharmacology, College of Pharmacy,  
10 Purdue University, West Lafayette, IN, 47907, USA

11 <sup>2</sup>Department of Psychological Sciences, College of Health and Human Sciences, Purdue  
12 University, West Lafayette, IN, 47907, USA

13 <sup>3</sup>Purdue Institute for Integrative Neuroscience, West Lafayette, IN, 47907, USA

14 <sup>4</sup>Purdue Interdisciplinary Life Sciences Graduate Program, West Lafayette, IN, 47907, USA

15 <sup>5</sup>Purdue Institute for Drug Discovery, West Lafayette, IN, 47907, USA

16 <sup>†</sup>Lead Contact

17 **\* Correspondence:** [rvanrijn@purdue.edu](mailto:rvanrijn@purdue.edu)

18

19

20

21

22

23

24

25

1

2

## Summary

3 Exposure to anxiety- or fear-invoking stimuli initiate a convergence of executive actions  
4 orchestrated by multiple proteins and neurotransmitters across the brain. Dozens of G  
5 protein-coupled receptors (GPCRs) have been linked to regulation of fear and anxiety. GPCR  
6 signaling involves canonical G protein pathways but may also engage downstream kinases  
7 and effectors through  $\beta$ -arrestin scaffolds. Here, we investigate whether  $\beta$ -arrestin signaling  
8 is critical for the emotional regulation of anxiety-like and fear-related behavior. Using the  $\delta$ -  
9 opioid receptor ( $\delta$ OR) as a model GPCR, we found that  $\beta$ -arrestin 2-dependent activation of  
10 extracellular signal-regulated kinases (ERK1/2) in the dorsal hippocampus and the amygdala  
11 are critical for  $\delta$ OR-induced anxiolytic-like effects. In contrast, G protein-mediated  $\delta$ OR  
12 signaling was associated with decreased ERK1/2 activity and increased fear-related behavior.  
13 Our results also suggest a potential contribution of  $\beta$ -arrestin 1 in fear-reducing effects.  
14 Overall, our findings highlight the significance of non-canonical  $\beta$ -arrestin signaling in the  
15 regulation of emotions.

16

17 **Key words:** GPCR;  $\beta$ -arrestin isoforms; anxiety; fear conditioning; ERK1/2; biased signaling;  
18 amygdala; dorsal hippocampus; nucleus accumbens; delta opioid receptor

19

20

21

22

23

24

25

1

2

3

## Introduction

4           Anxiety- and fear-related behaviors are evolutionary adaptive behaviors important for  
5 human survival. However, excessive stimulation of the neural circuits that regulate anxiety-  
6 and fear-related behaviors can lead to harmful psychiatric disorders. The expression of  
7 anxiety- and fear-related behaviors is regulated by complex integration of both internal and  
8 external physiological and sensory cues that influence reflexive behavior, cognitive control,  
9 and executive functions. Accordingly, behavioral correlates of anxiety and fear are regulated  
10 by a harmonious activity of neurotransmitters and cellular actions across many overlapping  
11 and distinct neural circuits (Tovote et al., 2015).

12           With regard to cellular actions underlying (patho-)physiological behavior, G protein-  
13 coupled receptors (GPCRs) play an important role in neuronal signaling. GPCRs bind  
14 neurotransmitters and initiate intracellular signal transduction pathways which ultimately  
15 affect neuronal excitability, neurotransmitter release and synaptic plasticity. GPCRs,  
16 including serotonergic (Akimova et al., 2009), dopaminergic (de la Mora et al., 2010),  
17 adrenergic (Kindt et al., 2009), opioidergic (Land et al., 2009) and corticotropin-releasing  
18 factor receptors (Takahashi, 2001) have well-documented roles in the modulation of anxiety  
19 and fear.

20           Traditionally, drug development at GPCRs has focused on the canonical G protein  
21 pathways; however, the prior two decades have introduced arrestin-dependent signaling as a  
22 new concept of GPCR signal transduction. In particular, the ‘non-visual’ arrestins 2 and 3,  
23 referred here as  $\beta$ -arrestin 1 and 2, respectively, have been associated with specific and  
24 unique drug effects. The primary role of  $\beta$ -arrestins is to desensitize GPCRs, for example,  
25 HIV1-tat infection increases  $\beta$ -arrestin 2 expression in mice amygdala, leading to significant

1 reduction in morphine efficacy in this region (Hahn et al., 2016). Beyond desensitization,  $\beta$ -  
2 arrestin 2 may also partake in receptor signaling by scaffolding with various kinases. For  
3 example,  $\beta$ -arrestin 2 p38 MAP kinase signaling has been linked to the aversive effects of  $\kappa$ -  
4 opioid receptor ( $\kappa$ OR) agonists (Bruchas et al., 2006; Land et al., 2009), whereas a  $\beta$ -arrestin  
5 2-GSK3 $\beta$ /AKT scaffold appears to be driving the antipsychotic effects of dopamine D<sub>2</sub>  
6 receptors agonists (Allen et al., 2011; Beaulieu et al., 2005). Currently, few studies have  
7 investigated how signaling scaffolds involving the  $\beta$ -arrestin isoforms may influence anxiety-  
8 and fear-like behavior. It is important to begin to address this gap in our current knowledge of  
9 the GPCR modulation of psychiatric behavior, especially since the majority of medications  
10 that target GPCRs were developed without consideration of the potential adverse or  
11 therapeutic effects of  $\beta$ -arrestin signaling. Yet, it is now possible to develop molecules that  
12 preferentially activate or avoid  $\beta$ -arrestin signaling and thus have the potential to treat  
13 psychiatric disorders more effectively and with a wider therapeutic window.

14 Here, we describe our efforts to elucidate the roles of  $\beta$ -arrestin isoforms in mediating  
15 GPCR signaling in relation to the modulation of anxiety and fear-like behavior. We chose to  
16 utilize the  $\delta$ -opioid receptor ( $\delta$ OR) as a model GPCR. Previous studies have shown that the  
17  $\delta$ OR selective agonist SNC80 is an efficacious recruiter of  $\beta$ -arrestin 1 and 2 proteins  
18 (Chiang et al., 2016; Pradhan et al., 2016; Vicente-Sanchez et al., 2018), and has anxiolytic-  
19 like (Saitoh et al., 2004; Saitoh et al., 2018) and fear-reducing effects (Li et al., 2009; Saitoh  
20 et al., 2004). Moreover, the  $\delta$ OR-selective agonist TAN67, which is a poor  $\beta$ -arrestin 2  
21 recruiter does not reduce anxiety-like behavior in naïve mice (van Rijn et al., 2010),  
22 providing further support for the correlation between  $\beta$ -arrestin 2 signaling and anxiety-like  
23 behavior.

24 Mitogen activated protein kinases (MAPKs) have been implicated with mood  
25 disorders and can scaffold with  $\beta$ -arrestin (Coyle and Duman, 2003; Lefkowitz and Shenoy,

1 2005). Studies have suggested that MAPK signaling, specifically ERK1/2, in the  
2 hippocampus and the basolateral amygdala is required for the acquisition and extinction of  
3 fear memory (Atkins et al., 1998; Herry et al., 2006). Therefore, we hypothesized that  $\beta$ -  
4 arrestin-dependent MAPK signaling may contribute to anxiety-like and fear-related behavior.  
5 To test our hypothesis, we assessed the degree to which  $\beta$ -arrestin isoforms and MAPK  
6 activation were involved in  $\delta$ OR agonist-mediated modulation of unconditioned anxiety-  
7 related behavior and cued-induced fear-related behavior. Our results suggest that ERK1/2  
8 activity is differentially modulated by G protein and  $\beta$ -arrestin signaling and is correlated  
9 with anxiety-like and fear-related responses in C57BL/6 mice. We noted that different  $\beta$ -  
10 arrestin isoforms were involved in the activation of ERK1/2 across various brain regions,  
11 including the striatum, hippocampus and amygdala.

12

13

## Results

### 14 Involvement of $\beta$ -arrestin 2 in the modulation of anxiety-like behavior

15 In 2016, Astra Zeneca revealed that their novel  $\delta$ OR selective agonist AZD2327 (**Fig. 1a**,  
16 **Left**) was capable of reducing anxiety-like behavior in mice (Richards et al., 2016).  
17 AZD2327 is not commercially available, but is structurally similar to SNC80, a commercially  
18 available  $\delta$ OR selective agonist (**Fig. 1a, Right**). SNC80 is a known super-recruiter of  $\beta$ -  
19 arrestin 2 (Chiang et al., 2016) (**Fig. 1b**) and similar to AZD2327 exhibits anxiolytic-like  
20 effects in rodents (Saitoh et al., 2004; van Rijn et al., 2010) . These previous findings led us  
21 to hypothesize that  $\beta$ -arrestin 2 may be required for the anxiolytic effects of SNC80 and  
22 AZD2327. Using two models of anxiety-like behavior, the elevated plus maze (EPM) test and  
23 dark-light box transition test (**Fig. 1c**), we measured the behavioral effects of SNC80 in  $\beta$ -  
24 arrestin 2 KO mice, at a dose known to produce anxiolytic-like effects in wild-type (WT)  
25 mice (van Rijn et al., 2010). As expected, systemic administration of SNC80 (20 mg/kg, s.c.)

1 significantly increased the time WT mice spent in the open arm (*elevated plus maze test*: **Fig.**  
2 **1d**; two-way ANOVA, Drug effect:  $F_{1,68} = 8.781, p=0.004$ ) and the light chamber (*Dark-light*  
3 *box test*: **Fig. 1e**; Drug effect:  $F_{1,59} = 4.978, p=0.03$ ). As we predicted, the anxiolytic effects  
4 of SNC80 were attenuated in  $\beta$ -arrestin 2 KO mice (*Elevated plus maze test*: **Fig. 1d**;  
5 Genotype effect:  $F_{1,68} = 3.15, p=0.08$ ; *Dark-light box test*: **Fig. 1e**; Genotype effect:  $F_{1,59} =$   
6  $1.039, p=0.312$ ). Although the total movement in the elevated plus maze was slightly lower  
7 in  $\beta$ -arrestin 2 KO mice than WT mice, no drug effects were observed in both genotypes  
8 (*elevated plus maze test*: **Fig. 1f**; two-way ANOVA, Drug vs. Genotype effect:  $F_{1,68} = 0.339,$   
9  $p=0.56$ ; Genotype effect:  $F_{1,68} = 20.7, p<0.0001$ ; Drug effect:  $F_{1,68} = 0.796, p=0.38$ ).  
10 Likewise, no statistical difference in total transition was observed in the dark light transition  
11 box test (*dark-light box test*: **Fig. 1g**; two-way ANOVA, Drug vs. Genotype effect:  $F_{1,57} =$   
12  $1.754, p=0.19$ ; Genotype effect:  $F_{1,57} = 0.1222, p<0.0001$ ; Drug effect:  $F_{1,57} = 0.037, p=0.85$ );  
13 however, as previously described, SNC80 produced hyperlocomotive behavior in mice  
14 ((Chiang et al., 2016), **Fig. S1**).

15

## 16 **The $\beta$ -arrestin recruiting $\delta$ OR agonist SNC80 strongly activates ERK1/2 *in vitro* and *in*** 17 ***vivo***

18 Activation of  $\kappa$ OR has been associated with  $\beta$ -arrestin 2-mediated p38 phosphorylation  
19 (Bruchas et al., 2006). To determine if  $\delta$ OR agonism similarly stimulates mitogen-activated  
20 protein kinases (MAPKs), we measured p38, JNK, and ERK1/2 activation in Chinese  
21 Hamster Ovarian cells stably expressing  $\delta$ OR and  $\beta$ -arrestin 2 (CHO- $\delta$ OR- $\beta$ Arr2) following  
22 stimulation with 10  $\mu$ M SNC80, a concentration that will fully activate G-protein signaling  
23 and induce  $\beta$ -arrestin 2 recruitment (Robins et al., 2018b). We found that SNC80 led to a  
24 rapid increase in ERK1/2 phosphorylation within 3 minutes in CHO- $\delta$ OR- $\beta$ Arr2 cells, which  
25 lasted until 60 minutes, in agreement with previous  $\delta$ OR-mediated ERK activation in CHO

1 cells (Rozenfeld and Devi, 2007). We did not observe strong activation of p38 and JNK by  
2 SNC80 (**Fig. 2a**). The  $\delta$ OR mediated ERK1/2 signaling in these cells were not an artifact of  
3 the recombinant overexpression of  $\delta$ OR and  $\beta$ -arrestin 2 in the CHO cells as we observed a  
4 similar profile for ERK1/2 activation in NG108-15 neuroblastoma cells endogenously  
5 expressing  $\delta$ OR and  $\beta$ -arrestin (Cen et al., 2001; Eisinger et al., 2002; Klee et al., 1982) (**Fig.**  
6 **2b**; one-way ANOVA,  $F_{4,30}=6.958$ ,  $p<0.0001$ ). We similarly found ERK1/2 activation in  
7 several mouse brain regions, known to express  $\delta$ ORs, including the dorsal hippocampus, the  
8 amygdala and the striatum (Chu Sin Chung et al., 2015; Erbs et al., 2015) (**Fig. 2c-e**). The  
9 SNC80-induced ERK1/2 activation in these regions was confirmed and quantified by the  
10 Western blot analysis of flash-frozen tissue punches upon collection (**Fig. 2f**). Here, we  
11 observed that SNC80 (20 mg/kg, i.p.) significantly increased ERK1/2 phosphorylation at the  
12 10-minute time-point in all tested brain regions except for the ventral hippocampus of WT  
13 mice (**Fig. 2g-k**; see **Table S1** for one-way ANOVA and post-hoc multiple comparison), and  
14 these activations returned to basal levels 30 minutes after the SNC80 administration.

15

### 16 **$\beta$ -arrestin 2 is required to activate ERK1/2 signaling in the limbic structures of the** 17 **brain**

18 To determine if  $\beta$ -arrestin 2 is responsible for the ERK1/2 activation in the tested brain  
19 regions (**Fig. 2g-k**), we injected 20 mg/kg of SNC80 in the  $\beta$ -arrestin 2 KO mice (**Fig. 3a**)  
20 and measured levels of ERK1/2 activation in the five brain regions tested in **Figure 2**. While,  
21 SNC80 still strongly activated ERK1/2 in the striatum and the nucleus accumbens of the  $\beta$ -  
22 arrestin 2 KO mice (**Fig. 3b-c**; see **Table S1** for one-way ANOVA and post-hoc multiple  
23 comparison), we did not observe significant SNC80-induced ERK1/2 activation in the  
24 amygdala, the ventral hippocampus and the dorsal hippocampus of these KO mice (**Fig. 3d-f**;  
25 see **Table S1** for one-way ANOVA and post-hoc multiple comparison).

1

## 2 **ERK1/2 signaling plays a key role in the SNC80-mediated anxiolytic-like effects**

3 We next assessed if the anxiolytic effects of SNC80 were dependent on ERK1/2 activation.  
4 We administered wild-type mice with SL327, a MEK1/2 inhibitor that indirectly prevents  
5 ERK1/2 activation, (**Fig. 4a**) (Tohgo et al., 2002). We found that SL327 (50 mg/kg, s.c.)  
6 ablated the anxiolytic-like effects of SNC80 (20 mg/kg, i.p.) in WT mice (**Fig. 4b**, one-way  
7 ANOVA,  $F_{3,34}=12.35$ ,  $p<0.0001$ ). Thus, SNC80 anxiolytic-like behavior relied on the  
8 presence of  $\beta$ -arrestin 2 (**Fig. 1d,e**) and MEK/ERK1/2 activation (**Fig. 2g-k**). The  
9 hippocampus is a brain region associated with anxiety-like behavior in the elevated plus maze  
10 (File et al., 2000) ~~40837844~~ and  $\delta$ OR-agonism in the dorsal hippocampus, as well as the  
11 amygdala reduces anxiety-like behavior in the open field test (Saitoh et al., 2018; Solati et al.,  
12 2010). These published findings agree with our observation of SNC80-induced  $\beta$ -arrestin 2-  
13 dependent ERK1/2 activity specifically in these two brain regions (**Fig. 3d,e**). Therefore, if  
14 the  $\beta$ -arrestin-mediated ERK1/2 signaling in these two regions was critical for the anxiolytic-  
15 like effects of SNC80, we would expect ERK1/2 activity to be abolished in these regions in  
16 the mice co-treated with SNC80 and SL327. Indeed, we found that SL327 effectively  
17 decreased SNC80-induced ERK1/2 activity in the dorsal hippocampus and the amygdala (**Fig.**  
18 **4c,d**, see **Table S2** for detailed statistics).

19

## 20 **Fear-potentiated startle behavior is correlated with ERK1/2 activity but is not mediated** 21 **by $\beta$ -arrestin 2**

22 Besides reducing anxiety-like behavior,  $\delta$ OR activation can also alleviate conditioned fear-  
23 related behavior (Saitoh et al., 2004; Sugiyama et al., 2019). Based on our results and  
24 previous studies, we hypothesized that SNC80 may similarly reduce fear-related behavior  
25 through a mechanism that involves  $\beta$ -arrestin 2. To measure conditioned fear, we utilized a



1 mouse behavior paradigm of fear-potentiated startle (FPS) (**Fig. 5a**). In WT mice (**Fig. 5b**),  
2 we noted that SNC80 (20 mg/kg, i.p.) significantly reduced startle responses to the  
3 unconditioned ‘noise’ cue as well as to the conditioned ‘light+noise’ cue (**Fig. 5c**; two-way  
4 ANOVA, stimuli x drug effects:  $F_{2,120}=20.42$ ,  $p<0.0001$ , stimuli effects:  $F_{2,120} = 92.8$ ,  
5  $p<0.0001$ , drug effects:  $F_{1,120}= 63.99$ ,  $p<0.0001$ ), resulting in a significant reduction in %  
6 FPS response (**Fig. 5d**; unpaired t-test,  $p=0.0085$ ). To our surprise, we found that SNC80 was  
7 equally effective in reducing % FPS responses in  $\beta$ -arrestin 2 KO mice (**Fig. 5e-f**; two-way  
8 ANOVA, stimuli x drug effects:  $F_{2,42}=20.22$ ,  $p<0.0001$ , stimuli effects:  $F_{2,42} = 51.52$ ,  
9  $p<0.0001$ , drug effects:  $F_{1,42}= 40.4$ ,  $p<0.0001$ ; noise:  $p=0.01$ , light+noise:  $p<0.0001$  after  
10 Bonferroni’s multiple comparison; **Fig. 5g**; unpaired t-test,  $p=0.0003$ ; **Fig. 5d,g**; comparison  
11 between WT and  $\beta$ -arrestin 2 KO via two-way ANOVA, Genotype x Drug effect:  $F_{1,53}=1.306$ ,  
12  $p=2.583$ ; Genotype effect:  $F_{1,53}=5.055$ ,  $p=0.029$ ; Drug effect:  $F_{1,53}=18.98$ ,  $p<0.0001$ ). While  
13 SNC80 is a very efficacious recruiter of  $\beta$ -arrestin, it still also fully activates  $G_i$  protein  
14 signaling (Chiang et al., 2016; Robins et al., 2018b). Thus, we next hypothesized that the  
15 observed fear-reducing effects of SNC80 could be mediated through  $G_i$  protein signaling. To  
16 address this hypothesis, we utilized a  $\delta$ OR selective agonist, TAN67, which is a poor  
17 recruiter of  $\beta$ -arrestin (**Fig. 5f**), and considered  $G_i$  protein-biased (Chiang et al., 2016; Robins  
18 et al., 2018b). However, when we administered TAN67 (25 mg/kg, i.p.) to our WT mice (**Fig.**  
19 **5h**), we found that TAN67 did not significantly change startle to the noise or to the  
20 light+noise stimuli (**Fig. 5i**; two-way ANOVA, stimuli x drug effects:  $F_{2,42}=0.725$ ,  $p=0.491$ ,  
21 stimuli effects:  $F_{2,42} = 25.06$ ,  $p<0.0001$ , drug effects:  $F_{1,42} = 0.275$ ,  $p=0.603$ ), but it did  
22 produce a significant increase in %FPS (**Fig. 5j**; unpaired t-test,  $p<0.0001$ ). The lack of a  
23 direct effect of TAN67 on noise-alone startle is in agreement with our previous finding that  
24 TAN67 did not change basal anxiety-like behavior in the elevated plus maze and dark-light  
25 transition test (van Rijn et al., 2010). Interestingly, our Western blot analysis of ERK1/2

1 activities in WT mice revealed that this  $G_i$  protein-biased agonist, TAN67, decreased ERK1/2  
2 phosphorylation in the dorsal striatum, the nucleus accumbens, the dorsal hippocampus and  
3 the amygdala (**Fig. 6a-d**). In the ventral hippocampus, TAN67 did not alter ERK1/2 activity  
4 (**Fig. 6e**), which was similar to the lack of ERK1/2 modulation by SNC80 in this region (**Fig.**  
5 **2m**) and may be indicative of low  $\delta$ OR expression in the ventral region as previously  
6 described (Mansour et al., 1987).

7

### 8 **Potential roles for ERK1/2 and $\beta$ -arrestin 1 in the modulation of conditioned-fear** 9 **behavior**

10 Our results suggest that SNC80 reduces conditioned fear through a mechanism that does not  
11 involve  $\beta$ -arrestin 2 or G protein signaling. Therefore, we next hypothesized that the effect  
12 may be mediated by  $\beta$ -arrestin 1 instead. However, SNC80 is known to induce severe  
13 seizures in  $\beta$ -arrestin 1 KO mice (Vicente-Sanchez et al., 2018), preventing us from testing  
14 the FPS response of SNC80 in this strain. Instead, we measured SNC80-induced ERK1/2  
15 phosphorylation in the  $\beta$ -arrestin 1 KO mice. In comparison to WT mice (**Fig. 2g-k**), genetic  
16 knockout of  $\beta$ -arrestin 1 prevented SNC80-mediated ERK1/2 phosphorylation in the dorsal  
17 striatum and nucleus accumbens (**Fig. 6f-g**; see **Table S3** for one-way ANOVA and post-hoc  
18 multiple comparison). In the amygdala and dorsal hippocampus of  $\beta$ -arrestin 1 KO mice,  
19 SNC80 did increase ERK1/2 phosphorylation (**Fig. 6h-i**), but in contrast to the response  
20 observed in WT mice, the activation was sustained for at least 30 minutes. Additionally, we  
21 observed the same trend in the ventral hippocampus (**Fig. 6j**), a region where we had  
22 observed no  $\delta$ OR agonist-mediated modulation of ERK1/2 in WT mice (**Fig. 2k and Fig. 6e**).  
23 Thus, we hypothesized that the increased ERK1/2 in these regions is most likely a result of  
24 seizure activity and not necessarily a result of  $\delta$ OR-mediated effects.

25

1

2

## Discussion

3 Here, we investigated the hypothesis that  $\beta$ -arrestin can modulate anxiety- and conditioned  
4 fear-related behavior via downstream MAPK activation. By utilizing G protein- and  $\beta$ -  
5 arrestin-biased  $\delta$ OR agonists together with  $\beta$ -arrestin-isoform selective knockout mice, we  
6 discovered that G protein,  $\beta$ -arrestin 1, and  $\beta$ -arrestin 2 uniquely modulated ERK1/2 activity  
7 resulting in differential outcomes in mouse models of anxiety/fear-related behavior. Our  
8 results suggest that the reduction in anxiety-like behavior by SNC80 required the presence of  
9  $\beta$ -arrestin 2 as well as activation of ERK1/2. Distinctly in the dorsal hippocampus, we found  
10 that ERK1/2 activation was  $\beta$ -arrestin 2-dependent (**Fig. 7a**). Notably, G protein-biased  
11 signaling by TAN67 reduced ERK1/2 phosphorylation and was correlated with increased  
12 FPS (**Fig. 7b**). We found that SNC80-induced ERK1/2 activation in the nucleus accumbens  
13 and the dorsal striatum required  $\beta$ -arrestin 1, which may be part of the mechanism for SNC80  
14 to decrease FPS (**Fig. 7c**).

15 *Differential roles for  $\beta$ -arrestin isoforms in neuropsychiatric behavior.* The  $\beta$ -arrestin  
16 proteins were discovered in quick succession (Attramadal et al., 1992; Lohse et al., 1990).  
17 Surprisingly, despite the availability of genetic KO mice for each isoform (Bohn et al., 1999;  
18 Conner et al., 1997). Studies investigating  $\beta$ -arrestin in the CNS have largely focused on  $\beta$ -  
19 arrestin 2 and have generally neglected  $\beta$ -arrestin 1 (Latapy and Beaulieu, 2013; Whalen et  
20 al., 2011). A potential reason for the preference of studying  $\beta$ -arrestin 2 may be that when the  
21  $\beta$ -arrestin 2 knockout mice were generated their first utilization was to highlight the proteins'  
22 involvement with the CNS-mediated adverse effects of  $\mu$ -opioid receptor agonism (Bohn et  
23 al., 2000; Raehal et al., 2005). Researchers have only recently begun to utilize  $\beta$ -arrestin 1  
24 KO mice to study various neurological disorders. In 2016, Pradhan *et al.* found that different  
25  $\delta$ OR agonists either preferentially recruited  $\beta$ -arrestin 1 leading to  $\delta$ OR degradation or

1 recruited  $\beta$ -arrestin 2 causing  $\delta$ OR resensitization (Pradhan et al., 2016). A study in 2017  
2 found that amphetamine-induced hyperlocomotion was amplified in  $\beta$ -arrestin 1 KO mice,  
3 but attenuated in  $\beta$ -arrestin 2 KO mice (Zurkovsky et al., 2017), further emphasizing the  
4 importance of studying both  $\beta$ -arrestin isoforms.

5 As mentioned, our study further identified that SNC80-induced anxiolytic-like effects  
6 were  $\beta$ -arrestin 2-dependent. However,  $\beta$ -arrestin 2 KO mice still exhibited the fear-reducing  
7 effect of SNC80, which could suggest a potential role for  $\beta$ -arrestin 1 in the modulation of  
8 fear-related behavior. Particularly, we also noted that  $\beta$ -arrestin 1 KO abolished SNC80-  
9 induced ERK1/2 activation in the striatum and nucleus accumbens. Our findings were in line  
10 with the extensive *in-situ* hybridization studies on differential  $\beta$ -arrestin isoform levels in  
11 neonatal and postnatal rats (Gurevich et al., 2002, 2004) and studies showing relatively high  
12  $\beta$ -arrestin 1 and low  $\beta$ -arrestin 2 expressions in the striatal regions (Attramadal et al., 1992;  
13 Bjork et al., 2008; Gurevich et al., 2002). In contrast, SNC80-induced ERK1/2 activation in  
14 the dorsal hippocampus and amygdala was  $\beta$ -arrestin 2-dependent, which agreed with reports  
15 of stronger expression of this isoform in those areas (Attramadal et al., 1992; Bjork et al.,  
16 2008). Unfortunately, we were limited in our ability to assess whether SNC80-induced  
17 reduction in FPS would be attenuated in  $\beta$ -arrestin 1 KO mice, as SNC80 produces severe  
18 seizures in these mice (Vicente-Sanchez et al., 2018), a phenomenon we have also observed  
19 ourselves and found to be accompanied by strong and persistent ERK1/2 activation in the  
20 dorsal hippocampus. Further investigation of the roles of  $\beta$ -arrestin 1 in neuropsychiatric  
21 behavior may be feasible using a conditional knockout approach; currently conditional  $\beta$ -  
22 arrestin 2 knockout mice already exist (Huang et al., 2018), but conditional  $\beta$ -arrestin 1  
23 knockout mice have not yet been reported.

24 *A unique role for  $G_i$  protein signaling and ERK1/2 signaling in conditioned fear-*  
25 *related behavior.* In contrast to the  $\beta$ -arrestin-mediated activation of ERK1/2, we found that

1 selectively activating the G protein pathway of the  $\delta$ OR using TAN67, a known weak  
2 recruiter of  $\beta$ -arrestin 1 and 2 (Chiang et al., 2016) (**Fig. S2**) decreased ERK1/2 activation,  
3 including in the striatum and the amygdala, and was associated with increased FPS. This  
4 result is in agreement with the observation and that blocking  $G_{i/o}$  protein signaling using  
5 pertussis toxin in the basolateral amygdala reduced FPS (Melia et al., 1992) and parallels  
6 finding that TAN67 did not reduce unconditioned anxiety-like behavior in naïve mice (van  
7 Rijn et al., 2010). Additionally, a study in ovariectomized mice found that estradiol benzoate,  
8 an anxiogenic estradiol prodrug (Morgan and Pfaff, 2002), decreased ERK in the  
9 hippocampus (Anchan et al., 2014), which supports our finding that decreased ERK1/2 is  
10 correlated with increased fear. It is noteworthy that both  $G_i$  protein and  $\beta$ -arrestin can activate  
11 ERK1/2 albeit via different mechanisms (Goldsmith and Dhanasekaran, 2007; Gutkind,  
12 2000). One explanation for our observation is that TAN67 competes with the endogenous  
13  $\delta$ OR agonist Leu-enkephalin, which is a much more efficacious recruiter of  $\beta$ -arrestin  
14 (Chiang et al., 2016) (**Fig. S3**). Importantly, based on observations of enhanced anxiety-like  
15 behavior in preproenkephalin KO mice, Leu-enkephalin has anxiolytic-like effects by itself  
16 (Kung et al., 2010; Ragnauth et al., 2001), which is in line with reports that the  $\delta$ OR  
17 antagonist, naltrindole, is anxiogenic (Narita et al., 2006). As a weak  $\beta$ -arrestin recruiter,  
18 TAN67 would attenuate any baseline Leu-enkephalin-induced  $\beta$ -arrestin-mediated ERK  
19 activity (**Fig. S3**). In contrast, because SNC80 is a stronger  $\beta$ -arrestin recruiter than Leu-  
20 enkephalin, it will elevate basal ERK1/2 activity produced by endogenous opioids. This  
21 hypothesis would also explain why SNC80-induced ERK1/2 activation is quite variable and  
22 produces on average only a two-fold increase.

23  *$\beta$ -arrestin serves as a scaffold for a range of kinases and effectors.* In our study, we  
24 found that  $\delta$ OR agonism strongly activates ERK1/2 compared to the other tested MAPKs,  
25 p38 and JNK, and that the ERK1/2 activity induced by SNC80 was negatively correlated with

1 FPS. Other GPCRs, besides the  $\delta$ OR, may also require  $\beta$ -arrestin-dependent ERK1/2  
2 signaling for modulation of fear. Specifically, in the infralimbic prefrontal cortex,  $\beta$ -  
3 adrenergic receptor activation can promote the extinction of contextual fear memory (Do-  
4 Monte et al., 2010). In a recent study, it was shown that in this same brain region  $\beta$ -arrestin 2-  
5 dependent ERK1/2 activation was required for  $\beta$ -adrenergic receptors agonists to stimulate  
6 extinction learning of cocaine-induced reward memories (Huang et al., 2018).  $\beta$ -arrestin 2-  
7 mediated signaling in the CNS is not exclusive to ERK1/2 signaling; following  $\kappa$ OR  
8 activation,  $\beta$ -arrestin 2 can scaffold with p38 as part of a potential mechanism for the  
9 aversive effects of  $\kappa$ OR agonists (Bruchas et al., 2007). A  $\beta$ -arrestin 2 scaffold of AKT,  
10 GSK3 $\beta$  and PP2A has been proposed as a mechanism for stabilizing mood (O'Brien et al.,  
11 2011), highlighting that  $\beta$ -arrestin signaling is also not limited to MAPKs. In fact, because  $\beta$ -  
12 arrestin 1, in contrast to  $\beta$ -arrestin 2, contains a nuclear translocation sequence (Hoepfner et  
13 al., 2012), this enables it to enter the nucleus and regulate gene transcription (Kang et al.,  
14 2005; Shi et al., 2007). While in this study we report  $\delta$ ORs require  $\beta$ -arrestin-dependent ERK  
15 signaling for reduction in anxiety-like behavior, it is certainly possible that other GPCRs may  
16 engage different intracellular signaling pathways following  $\beta$ -arrestin recruitment.

17 *Fear- and anxiety-like behaviors rely on shared but distinct neural circuits.* In our  
18 study, we observed that  $\beta$ -arrestin 2-dependent ERK1/2 activity in the dorsal hippocampus  
19 was associated with reduced anxiety-like behavior. Generally, CA1 regions of the ventral  
20 hippocampus are associated with responding to contextually-conditioned anxiogenic stimuli  
21 than dorsal CA1 regions (Fanselow and Dong, 2010; Jimenez et al., 2018), whereas the  
22 dorsal hippocampus is involved with cognitive functions, including exploration, navigation  
23 and memory (Kheirbek et al., 2013). Still, our finding that  $\delta$ OR signaling in the dorsal  
24 hippocampus is connected to the anxiolytic-like effects of SNC80, agrees with a study  
25 showing that intra-dorsal CA1 injection of the  $\delta$ OR antagonist naltrindole is anxiogenic

1 (Solati et al., 2010). Additionally, the anxiolytic-like effects of SNC80 may also involve  $\beta$ -  
2 arrestin 2-dependent ERK1/2 signaling in the amygdala, a region more commonly associated  
3 innate anxiety-like behavior (Felix-Ortiz et al., 2013; Tye et al., 2011). The basolateral  
4 amygdala (BLA) also plays an important role in fear conditioning (Janak and Tye, 2015),  
5 including FPS (Terburg et al., 2018). The BLA receives dopaminergic inputs from the ventral  
6 tegmental area and projects to the nucleus accumbens. It has been proposed that  
7 dopaminergic signaling in the BLA is important for cue-dependent fear-conditioning, such as  
8 FPS (Fadok et al., 2009) and that the BLA to nucleus accumbens projection is critical for  
9 consolidation of memories associated with aversive effects such as foot shock (Fadok et al.,  
10 2010; LaLumiere et al., 2005).

11 Our finding that ERK1/2 activation in the striatal regions was ablated in  $\beta$ -arrestin 1  
12 KO mice points to a role for striatal  $\beta$ -arrestin 1-mediated ERK1/2 signaling in the  
13 modulation of the expression of conditioned fear-related behavior. Processing and executing  
14 emotional behaviors in tasks such as the elevated plus maze and FPS tests engages multiple  
15 overlapping, yet distinct, brain regions and circuits involved in memory retrieval, locomotion,  
16 decision making, reward, and mood (Janak and Tye, 2015). Further studies with circuit-based  
17 approaches are necessary to assess the role of biased signaling pathways in the acquisition  
18 and expression of conditioned fear-related behavior.

19 *Beneficial roles of  $\beta$ -arrestin signaling.* For the longest time,  $\beta$ -arrestin 2 has been  
20 associated solely with adverse effects of opioid activation, including tolerance, constipation,  
21 respiratory depression, aversion and alcohol use (Raehal and Bohn, 2011; Raehal et al., 2005;  
22 van Rijn et al., 2010). These studies fueled a drive to develop G protein-biased opioids to  
23 treat pain and other disorders with an improved therapeutic window (Manglik et al., 2016;  
24 Mores et al., 2019). Yet, recently a number of studies have started to push back against this  
25 narrative (Austin Zamarripa et al., 2018; Hill et al., 2018; Kliewer et al., 2019). Clearly,  $\beta$ -

1 arrestin signaling is not inherently negative as the therapeutic effects of lithium and  
2 fluoxetine seem to depend on  $\beta$ -arrestin 2 (David et al., 2009). The increased propensity for  
3  $\beta$ -arrestin 1 KO mice to experience SNC80-induced seizure points to a potential beneficial  
4 role for this isoform in maintaining seizure threshold, which could be of use in the treatment  
5 of epilepsy. In this study, we provide additional insights regarding potential therapeutic  
6 benefits of  $\beta$ -arrestin signaling in reducing anxiety-like behavior. Providing adequate relief of  
7 chronic pain is not trivial, partly because it is often associated with negative affect (Corder et  
8 al., 2019; Massaly et al., 2019) including anxiety, which may exacerbate pain (al Absi and  
9 Rokke, 1991).  $\delta$ OR agonists have been proposed as potential treatment for chronic pain  
10 disorders (Pradhan et al., 2011), partly because they have the ability to not only provide  
11 analgesia, but also treat comorbid anxiety and depression (Perrine et al., 2006; Saitoh et al.,  
12 2004; van Rijn et al., 2010). However, our results would argue that developing G protein-  
13 biased  $\delta$ OR agonists may produce drugs that are suboptimal for the treatment of complex  
14 chronic pain; our findings suggest such a drug would not alleviate co-morbid fear and anxiety,  
15 but potentially even worsen these symptoms. Thus, our study results argue in favor of a  
16 reassessment of drug development efforts that seek solely to identify G protein-biased drugs.  
17 Instead, we propose that efforts should be directed towards the development of drugs with  
18 finely tuned bias and, if possible, towards development of molecules that are biased against a  
19 single  $\beta$ -arrestin isoform rather than both isoforms.

20 *Conclusion.* Overall, our results begin to reveal the complex- and context-specific  
21 nature of GPCR biased signaling in modulation of fear-related and anxiety-like behavior.  
22 These results expand our current understanding of therapeutic effects of  $\beta$ -arrestin signaling  
23 in mood disorders, which ultimately may aid development of more efficacious  
24 pharmacological treatment options for these disorders.

25



1

## Author Contributions

2 MJ.K.: formal analysis, investigation, writing – original draft, writing – review & editing,  
3 visualization; T.C.: formal analysis, investigation, writing – review & editing; G.E.M.:  
4 formal analysis, investigation, writing – review & editing; A.M.M. formal analysis,  
5 investigation; A.M.G. formal analysis, investigation, writing – review & editing; J.A.C.:  
6 formal analysis, writing – review & editing, supervision; R.M.vR.: Conceptualization, formal  
7 analysis, investigation, writing – original draft, writing – review & editing, visualization,  
8 supervision, project administration, funding acquisition

9

10

11

## Acknowledgements

12 This work was funded by a NARSAD Young Investigator Award from the Brain and  
13 Behavior Research Foundation (#23603 to RMvR) and the National Institute on Alcohol  
14 Abuse and Alcoholism (AA025368, AA026949, AA026675) and Drug Abuse (DA045897).  
15 We also appreciate Dr. Marcus M. Weera for technical assistance with the fear-conditioning  
16 experiments. Included diagrams were created with BioRender.

17

18

## Declaration of Interests

19 The authors declare that the research was conducted in the absence of any commercial or  
20 financial relationships that could be construed as a potential conflict of interest.

21

22

## Figure legends

23 **Figure 1. Beneficial role for  $\beta$ -arrestin 2 in reducing anxiety-like behavior** (a) Chemical  
24 similarity between AZD2327, a  $\delta$ OR agonist used in phase II clinical trials for anxious

1 major depressive disorder and SNC80. **(b)** Scheme highlighting that SNC80 is  $\delta$ OR  
2 selective agonist, that activates Gi proteins but also strongly recruits  $\beta$ -arrestin 2. **(c)**  
3 Schematic diagram of the elevated plus maze test and dark-light box test. **(d)** The  $\beta$ -arrestin-  
4 biased  $\delta$ OR agonist, SNC80 (20 mg/kg, s.c.), significantly increased percentage of time spent  
5 in open arms in WT mice (n=15). but not  $\beta$ -arrestin 2 KO mice (n=21). **(e)** SNC80 increased  
6 percentage of time spent in light box in WT mice (control: n=12, SNC80: n=11), but not in  $\beta$ -  
7 arrestin 2 KO mice (n=20). **(f)** The total time of movements were equal between drug  
8 treatments. **(g)** No statistical significance was observed in the total transitions between light  
9 and dark chambers. (Significance was calculated by two-way ANOVA followed by a Sidak's  
10 multiple comparison; \* $p$ <0.05; all values are shown as individual data points  $\pm$  S.E.M.).

11

12 **Figure 2. The anxiolytic agonist SNC80 activates ERK1/2 in vitro and in the limbic and**  
13 **striatal regions of the brain (a)** 10  $\mu$ M SNC80 strongly increased ERK1/2 phosphorylation,  
14 compared to p38 and JNK, in CHO cells stably expressing  $\delta$ OR and  $\beta$ -arrestin 2. A  
15 representative Western blot image is presented to the right. **(b)** SNC80 increased ERK1/2  
16 phosphorylation in a time-dependent manner, in NG-108-15 cells endogenously expressing  
17  $\delta$ OR. A representative Western blot image is shown on the right. Representative  
18 immunofluorescence staining images of the limbic regions **(c)** and striatal regions **(d)** from  
19 mice 10 minute post administration of saline or SNC80 (20 mg./kg i.p.; Green: ERK; Red:  
20 pERK; Blue: DAPI; Image was stitched at 10x magnification and the scale is provided in the  
21 image). **(e)** 20x magnification images of the hippocampal/amygdalar and striatal slices (The  
22 corresponding location is marked in white square in 10x images). **(f)** Representative images of  
23 brain sections with micropunctures of five specified brain regions for the Western blot  
24 analysis. **(g-k)** Activation of ERK1/2 protein activity following systemic administration of  
25 SNC80 in five wild-type mice brain regions. Representative Western blot images are depicted

1 below the respective bar graph (For (a), significance was measured by two-way ANOVA  
2 followed by a Dunnett's multiple comparison. For (c, i-m), significance was analyzed by one-  
3 way ANOVA followed by a Tukey's multiple comparison; \* $p < 0.05$ , \*\* $p < 0.01$ , \*\*\*\* $p <$   
4  $0.0001$ ; all values are shown as individual data points  $\pm$  S.E.M.).

5

6 **Figure 3. ERK1/2 activation in the amygdala and the dorsal hippocampus are  $\beta$ -arrestin**

7 **2 dependent (a)** Schematic diagram of the cellular context in  $\beta$ -arrestin 2 genetic KO mice.

8 SNC80 (20 mg/kg, i.p.) induced ERK1/2 activation in the dorsal striatum (b) and nucleus

9 accumbens (c).  $\beta$ -arrestin 2 KO ablated the SNC80-induced ERK1/2 activation in the dorsal

10 hippocampus (d) and the amygdala (e) with no effects in the ventral hippocampus. (f)

11 Representative Western blot images are shown to the right of the related bar graph.

12 (Significance was analyzed by one-way ANOVA followed by a Tukey's multiple

13 comparison; \* $p < 0.05$ , \*\* $p < 0.01$ ; all values are shown as individual data points  $\pm$  S.E.M.).

14

15 **Figure 4. ERK1/2 is required for the anxiolytic-like effects induced by SNC80 (a)** A

16 schematic diagram of SL327 induced inhibition of SNC80 mediated ERK1/2 signaling. (b)

17 SL327 (50 mg/kg, s.c.), attenuated the anxiolytic-like effects of SNC80 (20 mg/kg i.p.) in

18 WT mice (control: n=8, SNC80: n=12, SNC+SL: n=12, SL327: n=12). (c-d) SL327

19 significantly inhibited SNC80-induced ERK1/2 phosphorylation in the dorsal hippocampus

20 and the amygdala (Significance was calculated by one-way ANOVA followed by a Sidak's

21 or Tukey's multiple comparison; \* $p < 0.05$ , \*\* $p < 0.01$ , \*\*\* $p < 0.001$ , \*\*\*\* $p < 0.0001$ , # $p < 0.05$ ;

22 all values are shown as individual data points  $\pm$  S.E.M.; SNC+SL means SNC80+SL327 and

23 SL means SL327).

24

1 **Figure 5. Unique modulation of fear-potentiated startle (FPS) by a  $\beta$ -arrestin-biased**  
2 **and G protein-biased  $\delta$ OR agonist (a)** Schematic representation of the three-day  
3 experimental paradigm of the fear potentiated startle test; drugs were administered prior to  
4 the tests on the third day (See [Figure S4](#) for Day 1 acoustic startle test). **(b-d)** SNC80 (n=21)  
5 reduced raw startle amplitudes to noise or light+noise and % FPS during the FPS test in WT  
6 mice. **(e-g)** SNC80 also reduced raw startle amplitudes to noise or light+noise and % FPS in  
7  $\beta$ -arrestin 2 KO mice (n=8). **(h-j)** Yet, G protein-biased agonist, TAN67, increased % FPS in  
8 WT mice (n=8) (Significance was measured by two-way ANOVA followed by a Tukey's  
9 multiple comparison or unpaired t-test; \* $p < 0.05$ , \*\* $p < 0.01$ , \*\*\* $p < 0.001$ , \*\*\*\* $p < 0.0001$ ;  
10 all values are shown as individual data points  $\pm$  S.E.M.).

11

12 **Figure 6. Differential roles for G protein and  $\beta$ -arrestin 1 in  $\delta$ OR agonist-induced**  
13 **ERK1/2 activation (a-e)** The G protein-biased  $\delta$ OR agonist TAN67 (25 mg/kg, i.p.),  
14 decreased the basal ERK1/2 activity in all tested brain regions of wild-type mice.  
15 Representative Western blot images are depicted next to each related bar graph. **(f-j)**.  
16 Systemic administration of SNC80 (20 mg/kg, i.p.) did not activate ERK1/2 in the striatal  
17 regions of  $\beta$ -arrestin 1 KO mice but resulted in persistent ERK1/2 activation in the dorsal and  
18 ventral hippocampus and amygdala (Significance was analyzed by one-way ANOVA  
19 followed by a Tukey's multiple comparison; \* $p < 0.05$ , \*\* $p < 0.01$ ; all values are shown as  
20 individual data points  $\pm$  S.E.M.).

21

22 **Figure 7. Graphical summary**  $\delta$ OR agonists differentially induce ERK activation in a  $\beta$ -  
23 arrestin isoform specific manner to modulate anxiety- and conditioned fear-related behaviors.  
24 SNC80 induced  $\beta$ -arrestin 2-mediated ERK1/2 activation (*Cellular Makeup*) in the  
25 hippocampus and amygdala (*Localization*) decreased anxiety-like behavior **(a)**, whereas an

1 increase in conditioned fear-related behavior (*Behavior*) by TAN67 can be linked to  
2 decreased ERK1/2 activity in all tested brain regions except for the ventral hippocampus (**b**).  
3 Decreased FPS could not be correlated with G protein or  $\beta$ -arrestin 2 signaling, but may  
4 involve  $\beta$ -arrestin -1 dependent ERK1/2 signaling in the dorsal striatum and nucleus  
5 accumbens (**c**).

6

7

8

9

## 1 **STAR Methods**

2 **Animals** Wild-type (WT) C57BL/6 male mice were purchased from Envigo (Indianapolis,  
3 IN), and  $\beta$ -arrestin 1 or 2 global knockout (KO) mice were bred in our facility (Chiang et al.,  
4 2016; Robins et al., 2018a). Adult mice (8-10 weeks,  $24 \pm 2$ g) were group housed (3-5 mice)  
5 in a single ventilated Plexiglas cage. Mice were maintained at ambient temperature (21°C) in  
6 an animal housing facility approved by the Association for Assessment and Accreditation of  
7 Laboratory Animal Care and animals were kept on a reversed 12-hour dark-light cycle (lights  
8 off at 10:00, lights on at 22:00). Food and water were provided ad libitum. Purchased mice  
9 were acclimated for one week prior to the experiments. All animal protocols (#1305000864  
10 by RMvR) were preapproved by Purdue Animal Care and Use Committee and were in  
11 accordance with the National Institutes of Health's Guide for the Care and Use of Laboratory  
12 Animals.

13 **Drug preparation and administration** SNC80 (#076410, Tocris, Thermo Fisher Scientific,  
14 Waltham, MA) was diluted in slightly acidic saline pH5-6. TAN67 (#092110, Tocris,  
15 Thermo Fisher Scientific) was diluted in saline, and SL327 (#19691, Tocris, Thermo Fisher  
16 Scientific) was diluted in 5% DMSO, 10% Cremophore (Millipore Sigma, Burlington, MA)  
17 and 85% saline. 20 mg/kg SNC80 was subcutaneously administered 30 minutes prior to the  
18 tests in **Fig. 1d-g**, **Fig. 4b** and **Fig. S1**, and 50 mg/kg SL327 was subcutaneously  
19 administered 60 minutes prior to the administration of SNC80 for **Fig. 4**. For **Fig. 2-6** and  
20 **Fig. S4**, either 20 mg/kg SNC80 or 25 mg/kg TAN67 was intraperitoneally administered at  
21 the indicated timepoint prior to the testing. The dose of SNC80 and TAN67 was determined  
22 based on our previous study (van Rijn et al., 2010) and our preliminary studies (data not  
23 shown). Separate batches of mice with no prior history of drug injection were used for the  
24 brain collection and behavioral tests to test earlier time-points of ERK1/2 signaling (such as  
25 10 minutes).

1 **Elevated-plus maze test** The elevated-plus maze test was performed as previously described  
2 (van Rijn et al., 2010). Mice were allowed to explore the maze for 5 minutes, and arm entries  
3 and time spent in each arm were recorded with a camera positioned above the maze.

4 **Dark–light transition box test** The test was performed based on previously established  
5 protocols (Robins et al., 2018a; van Rijn et al., 2010) Testing was conducted without a  
6 habituation session to the boxes and a 1/2 area dark insert was placed in the locomotor boxes,  
7 leaving the remaining 1/2 of the area lit as described previously (Bourin and Hascoet,  
8 2003)(Bourin and Hascoet, 2003). Two LED lights were inserted above the light portion of  
9 the testing chamber where the lux of the light region ranged from 390-540 lumens and dark  
10 chamber lux ranged from 0-12 lumens. For testing, animals were placed in the light portion  
11 of the chamber and testing began upon animal entry. Time spent in the dark and light  
12 chambers as well as their locomotor activity was recorded for 5 minutes with a photobeam-  
13 based tracking system.

14 **Fear potentiated startle (FPS) test** Startle reflexes of mice were recorded in the startle  
15 reflex chambers (25.8 x 25 x 26.5 cm) using the Hamilton Kinder Startle Monitor system  
16 (Kinder Scientific, Poway, CA). Mice groups were counterbalanced, such that no significant  
17 differences between startle reflexes were observed between groups (**Fig. S4**). On the  
18 conditioning day, all subjects were conditioned with 40 conditioning trials by a fixed 2  
19 minute inter-trial interval (ITI), and FPS responses were tested on the following day. The fear  
20 conditioning and FPS parameters were based on a previously established protocol (Barrenha  
21 and Chester, 2007).

22 **Preparation of tissue homogenates** After drug injections, mice were euthanized by carbon  
23 dioxide asphyxiation and rapidly decapitated. Based on our previous studies, we have  
24 particularly chosen carbon dioxide asphyxiation over other euthanasia methods that may  
25 potentially increase basal ERK1/2 activity in the brain (Ko et al., 2019). The collected brains

1 were first sliced as coronal sections (1.5-2.0 mm) with a brain matrix (#RBMS-205C, Kent  
2 scientific, Torrington, CT), and then flash-frozen in dry-ice-chilled 2-methylbutane (-40 °C)  
3 (#03551-4, Fisher Scientific). Regions of interest were collected from these slices using a 1  
4 mm biopsy micropunch (#15110-10, Miltex, Plainsboro, NJ) as follows: dorsal striatum and  
5 nucleus accumbens (A/P: +0.5 mm to +1.5 mm), dorsal hippocampus and amygdala (A/P: -1  
6 mm to -2 mm), and ventral hippocampus (A/P: -2 mm to -4 mm) (Paxinos and Franklin,  
7 2004). The punches targeted a specific region and produced enough tissue to run several blots.  
8 However, it is noteworthy that the extracted tissue may contain small amounts of tissue from  
9 neighboring regions. For example, while the punches for the amygdala primarily consisted of  
10 the BLA, the tissue will also have included a small portion of the central amygdala. Collected  
11 tissues were further homogenized with a tissue grinder (#357535 & 357537, DWK Life  
12 Sciences, Millville, NJ) in RIPA buffer mixed Halt<sup>TM</sup> Protease and Phosphatase Inhibitor  
13 Cocktail (#1861280, Thermo Fisher Scientific). Samples were further prepared based on  
14 previously established protocols (Ko et al., 2019). Data depicted in **Fig. 2i-m** also includes  
15 the data collected for SNC80 at the 0 min or 10 min time points in the experiment depicted in  
16 **Fig. 4c,d** to represent the full range of observed SNC80 induced ERK1/2 activation in mice  
17 tested in separate cohorts at different occasions.

18 **Cell culture** Chinese hamster ovarian CHO- $\delta$ OR- $\beta$ Arr2 cells (DiscoverX, Fremont, CA)  
19 U2OS- $\delta$ OR- $\beta$ Arr1 (DiscoverX), and NG-108-15 cells (HB-12317<sup>TM</sup>, ATCC®, Manassas,  
20 VA) were cultured as recommended by the manufacturer and maintained at 37° C/5 % CO<sub>2</sub>.  
21 Cells were seeded in a clear 6 well plate (Corning<sup>TM</sup>, Thermo Fisher Scientific) with 250,000  
22 cells/2 mL/well. On the following day, all growth media was aspirated and changed into 1  
23 mL serum-free Opti-MEM (#31985070, Gibco®, Thermo Fisher Scientific). The next day,  
24 cells were challenged with 10  $\mu$ M drugs (SNC80) for a specific duration (0, 3, 6, 20, and 60  
25 minutes). All drugs were diluted in Opti-MEM prior to administration. The media was



1 aspirated following the challenge and 100  $\mu$ L RIPA buffer was added to collect the samples  
2 on ice. Using cell scrapers (#353089, Thermo Fisher Scientific), all samples were dislodged  
3 from the 6 well plate, collected and stored at  $-30^{\circ}$  C until usage. For the Western blot, the  
4 collected samples were quantified with the Bradford assay and samples were prepared with 4  
5 x Laemmli and boiled at  $95^{\circ}$  C for 5 minutes. The CHO- $\delta$ OR- $\beta$ Arr2 cells were also used to  
6 measure  $\beta$ -arrestin recruitment using the DiscoverX PathHunter Assay as previously  
7 described (Chiang et al., 2016).

8 **SDS-Page and Western blot** Samples (20  $\mu$ L containing 10  $\mu$ g protein) were loaded per  
9 well of a NuPage 4-12 % Bis-Tris gradient gels (#NP0336BOX, Thermo Fisher Scientific),  
10 and the SDS-Page gel was subsequently transferred to nitrocellulose membranes (#1620115,  
11 BioRad) by the Western blot. Membranes were incubated following previously established  
12 protocols (Ko et al., 2019). For reproducibility, detailed information regarding the antibodies  
13 used in the study are listed in **Table S4**. Prepared samples were scanned using the LiCor  
14 Odyssey® CLx Scanner (Li-Cor, Lincoln, NE). By utilizing the Li-Cor secondary antibodies,  
15 we were able to detect the MAPK, pMAPK, and  $\alpha$ -Tubulin on the same blot without the need  
16 of stripping/reblotting. In the same membrane, each band was cut based on their size. For  
17 instance, ERK1/2 and pERK1/2 bands were collected around 42/44 kDa and  $\alpha$ -Tubulin band  
18 was collected around 50 kDa in the same membrane. For statistical analysis, we normalized  
19 the pMAPK/MAPK ratio to  $\alpha$ -Tubulin in case drug treatment changed ERK1/2 levels.

20 **Preparation of tissue for immunofluorescence** To preserve the intact ERK1/2 activity in  
21 vivo for fluorescence microscopy, mice were transcardially perfused before isolation of brain  
22 tissue. Thirty minutes prior to transcardiac perfusion, mice were administered with 100/10  
23 mg/kg Ketamine/Xylazine. Ten minutes prior to perfusion, 20 mg/kg SNC80 (i.p.) or a  
24 corresponding volume of saline was administered to the mice. Mice were then perfused with  
25 30 mL of cold PBS and 4% paraformaldehyde (#100503-916, VWR, Radnor, PA) and were

1 immediately decapitated to collect the brains. The brains were fixated in 4%  
2 paraformaldehyde overnight, dehydrated in 30% sucrose, and then embedded in Frozen  
3 Section Compound (#3801480, Leica, Wetzlar, Germany). Frozen brains were sliced at a  
4 width of 30  $\mu\text{m}$  using the Leica cryostat and permeabilized in 100% methanol at - 20  $^{\circ}\text{C}$  for  
5 10 minutes. The slices were blocked in 5 % Normal goat serum (#S26-100ml, Millipore  
6 Sigma) for an hour then stained with primary antibodies as listed in [Table S4](#). For  
7 immunofluorescence labeling, the sections were incubated in the secondary antibodies  
8 according to the previously established protocol (Kim et al., 2018) and as listed in [Table S4](#).  
9 After the final washing, the nuclei of the sections were stained and the slices were mounted  
10 on a glass slide with Vectashield® (#H-1200, Vector lab, Burlingame, CA). Images were  
11 acquired with a Nikon confocal microscope and assembled in Adobe Photoshop CS6 (Adobe).  
12 **Statistical analysis** The maximum amplitude of the startle response was measured from the  
13 average of all responses for each trial type (12 noise-alone, 12 light+noise) of each mouse.  
14 Fear-potentiated startle response was analyzed using raw (maximum) startle amplitudes and  
15 proportional changes of each trial type (noise-alone, light+noise), which is shown as % FPS  
16 in the graphs. The proportional change score (% FPS) was calculated as follows: (startle  
17 response to light and noise – startle response to noise)/startle response to noise x 100.  
18 Thus, %FPS is a sensitive measure that adjusts for individual and group differences (e.g.,  
19 possible non-specific effects of drug treatment) in startle response magnitude that may be  
20 observed on noise-alone and light + noise trials (Walker and Davis, 2002).

21 All data are presented as individual data points (or means)  $\pm$  standard error of the  
22 mean (S.E.M.). Assays with one independent variable were analyzed for statistical  
23 significance using a one-way Analysis of Variance (ANOVA), whereas assays with two  
24 independent variables were analyzed using a two-way ANOVA. If a significant deviation of  
25 the mean was identified, an appropriate post-hoc analysis was performed as indicated.

1 Gaussian distribution of our datasets was assessed using the D’augostino and Pearson  
2 analysis. We excluded one outlier in our wild-type cohort that received SNC80 and one that  
3 received TAN-67 in the FPS assay based on the Grubbs’ test ( $\alpha = 0.05$ ). In the dark-light and  
4 elevated plus maze tests we excluded subjects that were frozen/stationary for >95% of the  
5 experimental time. All statistical analysis was conducted using GraphPad Prism 7 (GraphPad  
6 Software, La Jolla, CA).

7

8

9

### References

- 10 Akimova, E., Lanzenberger, R., and Kasper, S. (2009). The serotonin-1A receptor in anxiety  
11 disorders. *Biol Psychiatry* 66, 627-635.
- 12 al Absi, M., and Rokke, P.D. (1991). Can anxiety help us tolerate pain? *Pain* 46, 43-51.
- 13 Allen, J.A., Yost, J.M., Setola, V., Chen, X., Sassano, M.F., Chen, M., Peterson, S., Yadav,  
14 P.N., Huang, X.P., Feng, B., *et al.* (2011). Discovery of beta-arrestin-biased dopamine D2  
15 ligands for probing signal transduction pathways essential for antipsychotic efficacy. *Proc*  
16 *Natl Acad Sci U S A* 108, 18488-18493.
- 17 Anchan, D., Clark, S., Pollard, K., and Vasudevan, N. (2014). GPR30 activation decreases  
18 anxiety in the open field test but not in the elevated plus maze test in female mice. *Brain*  
19 *Behav* 4, 51-59.
- 20 Atkins, C.M., Selcher, J.C., Petraitis, J.J., Trzaskos, J.M., and Sweatt, J.D. (1998). The  
21 MAPK cascade is required for mammalian associative learning. *Nat Neurosci* 1, 602-609.
- 22 Attramadal, H., Arriza, J.L., Aoki, C., Dawson, T.M., Codina, J., Kwatra, M.M., Snyder, S.H.,  
23 Caron, M.G., and Lefkowitz, R.J. (1992). Beta-arrestin2, a novel member of the arrestin/beta-  
24 arrestin gene family. *J Biol Chem* 267, 17882-17890.
- 25 Austin Zamarripa, C., Edwards, S.R., Qureshi, H.N., Yi, J.N., Blough, B.E., and Freeman,  
26 K.B. (2018). The G-protein biased mu-opioid agonist, TRV130, produces reinforcing and  
27 antinociceptive effects that are comparable to oxycodone in rats. *Drug Alcohol Depend* 192,  
28 158-162.
- 29 Barrenha, G.D., and Chester, J.A. (2007). Genetic correlation between innate alcohol  
30 preference and fear-potentiated startle in selected mouse lines. *Alcohol Clin Exp Res* 31,  
31 1081-1088.

- 1 Beaulieu, J.M., Sotnikova, T.D., Marion, S., Lefkowitz, R.J., Gainetdinov, R.R., and Caron,  
2 M.G. (2005). An Akt/beta-arrestin 2/PP2A signaling complex mediates dopaminergic  
3 neurotransmission and behavior. *Cell* 122, 261-273.
- 4 Bjork, K., Rimondini, R., Hansson, A.C., Terasmaa, A., Hyytia, P., Heilig, M., and Sommer,  
5 W.H. (2008). Modulation of voluntary ethanol consumption by beta-arrestin 2. *FASEB J* 22,  
6 2552-2560.
- 7 Bohn, L.M., Gainetdinov, R.R., Lin, F.T., Lefkowitz, R.J., and Caron, M.G. (2000). Mu-  
8 opioid receptor desensitization by beta-arrestin-2 determines morphine tolerance but not  
9 dependence. *Nature* 408, 720-723.
- 10 Bohn, L.M., Lefkowitz, R.J., Gainetdinov, R.R., Peppel, K., Caron, M.G., and Lin, F.T.  
11 (1999). Enhanced morphine analgesia in mice lacking beta-arrestin 2. *Science* 286, 2495-  
12 2498.
- 13 Bourin, M., and Hascoet, M. (2003). The mouse light/dark box test. *European journal of*  
14 *pharmacology* 463, 55-65.
- 15 Bruchas, M.R., Land, B.B., Aita, M., Xu, M., Barot, S.K., Li, S., and Chavkin, C. (2007).  
16 Stress-induced p38 mitogen-activated protein kinase activation mediates kappa-opioid-  
17 dependent dysphoria. *J Neurosci* 27, 11614-11623.
- 18 Bruchas, M.R., Macey, T.A., Lowe, J.D., and Chavkin, C. (2006). Kappa opioid receptor  
19 activation of p38 MAPK is GRK3- and arrestin-dependent in neurons and astrocytes. *J Biol*  
20 *Chem* 281, 18081-18089.
- 21 Cen, B., Yu, Q., Guo, J., Wu, Y., Ling, K., Cheng, Z., Ma, L., and Pei, G. (2001). Direct  
22 binding of beta-arrestins to two distinct intracellular domains of the delta opioid receptor. *J*  
23 *Neurochem* 76, 1887-1894.
- 24 Chiang, T., Sansuk, K., and van Rijn, R.M. (2016). beta-Arrestin 2 dependence of delta  
25 opioid receptor agonists is correlated with alcohol intake. *Br J Pharmacol* 173, 332-343.
- 26 Chu Sin Chung, P., Keyworth, H.L., Martin-Garcia, E., Charbogne, P., Darcq, E., Bailey, A.,  
27 Filliol, D., Matifas, A., Scherrer, G., Ouagazzal, A.M., *et al.* (2015). A novel anxiogenic role  
28 for the delta opioid receptor expressed in GABAergic forebrain neurons. *Biol Psychiatry* 77,  
29 404-415.
- 30 Conner, D.A., Mathier, M.A., Mortensen, R.M., Christe, M., Vatner, S.F., Seidman, C.E., and  
31 Seidman, J.G. (1997). beta-Arrestin1 knockout mice appear normal but demonstrate altered  
32 cardiac responses to beta-adrenergic stimulation. *Circ Res* 81, 1021-1026.

- 1 Corder, G., Ahanonu, B., Grewe, B.F., Wang, D., Schnitzer, M.J., and Scherrer, G. (2019).
- 2 An amygdalar neural ensemble that encodes the unpleasantness of pain. *Science* *363*, 276-
- 3 281.
- 4 Coyle, J.T., and Duman, R.S. (2003). Finding the intracellular signaling pathways affected by
- 5 mood disorder treatments. *Neuron* *38*, 157-160.
- 6 David, D.J., Samuels, B.A., Rainer, Q., Wang, J.W., Marsteller, D., Mendez, I., Drew, M.,
- 7 Craig, D.A., Guiard, B.P., Guilloux, J.P., *et al.* (2009). Neurogenesis-dependent and -
- 8 independent effects of fluoxetine in an animal model of anxiety/depression. *Neuron* *62*, 479-
- 9 493.
- 10 de la Mora, M.P., Gallegos-Cari, A., Arizmendi-Garcia, Y., Marcellino, D., and Fuxe, K.
- 11 (2010). Role of dopamine receptor mechanisms in the amygdaloid modulation of fear and
- 12 anxiety: Structural and functional analysis. *Prog Neurobiol* *90*, 198-216.
- 13 Do-Monte, F.H., Kincheski, G.C., Pavesi, E., Sordi, R., Assreuy, J., and Carobrez, A.P.
- 14 (2010). Role of beta-adrenergic receptors in the ventromedial prefrontal cortex during
- 15 contextual fear extinction in rats. *Neurobiol Learn Mem* *94*, 318-328.
- 16 Eisinger, D.A., Ammer, H., and Schulz, R. (2002). Chronic morphine treatment inhibits
- 17 opioid receptor desensitization and internalization. *J Neurosci* *22*, 10192-10200.
- 18 Erbs, E., Faget, L., Scherrer, G., Matifas, A., Filliol, D., Vonesch, J.L., Koch, M., Kessler, P.,
- 19 Hentsch, D., Birling, M.C., *et al.* (2015). A mu-delta opioid receptor brain atlas reveals
- 20 neuronal co-occurrence in subcortical networks. *Brain Struct Funct* *220*, 677-702.
- 21 Fadok, J.P., Darvas, M., Dickerson, T.M., and Palmiter, R.D. (2010). Long-term memory for
- 22 pavlovian fear conditioning requires dopamine in the nucleus accumbens and basolateral
- 23 amygdala. *PLoS One* *5*, e12751.
- 24 Fadok, J.P., Dickerson, T.M., and Palmiter, R.D. (2009). Dopamine is necessary for cue-
- 25 dependent fear conditioning. *J Neurosci* *29*, 11089-11097.
- 26 Fanselow, M.S., and Dong, H.W. (2010). Are the dorsal and ventral hippocampus
- 27 functionally distinct structures? *Neuron* *65*, 7-19.
- 28 Felix-Ortiz, A.C., Beyeler, A., Seo, C., Leppla, C.A., Wildes, C.P., and Tye, K.M. (2013).
- 29 BLA to vHPC inputs modulate anxiety-related behaviors. *Neuron* *79*, 658-664.
- 30 File, S.E., Kenny, P.J., and Cheeta, S. (2000). The role of the dorsal hippocampal
- 31 serotonergic and cholinergic systems in the modulation of anxiety. *Pharmacol Biochem*
- 32 *Behav* *66*, 65-72.
- 33 Goldsmith, Z.G., and Dhanasekaran, D.N. (2007). G protein regulation of MAPK networks.
- 34 *Oncogene* *26*, 3122-3142.

- 1 Gurevich, E.V., Benovic, J.L., and Gurevich, V.V. (2002). Arrestin2 and arrestin3 are  
2 differentially expressed in the rat brain during postnatal development. *Neuroscience* *109*,  
3 421-436.
- 4 Gurevich, E.V., Benovic, J.L., and Gurevich, V.V. (2004). Arrestin2 expression selectively  
5 increases during neural differentiation. *J Neurochem* *91*, 1404-1416.
- 6 Gutkind, J.S. (2000). Regulation of mitogen-activated protein kinase signaling networks by G  
7 protein-coupled receptors. *Sci STKE* *2000*, re1.
- 8 Hahn, Y.K., Paris, J.J., Lichtman, A.H., Hauser, K.F., Sim-Selley, L.J., Selley, D.E., and  
9 Knapp, P.E. (2016). Central HIV-1 Tat exposure elevates anxiety and fear conditioned  
10 responses of male mice concurrent with altered mu-opioid receptor-mediated G-protein  
11 activation and beta-arrestin 2 activity in the forebrain. *Neurobiol Dis* *92*, 124-136.
- 12 Herry, C., Trifilieff, P., Micheau, J., Luthi, A., and Mons, N. (2006). Extinction of auditory  
13 fear conditioning requires MAPK/ERK activation in the basolateral amygdala. *Eur J*  
14 *Neurosci* *24*, 261-269.
- 15 Hill, R., Disney, A., Conibear, A., Sutcliffe, K., Dewey, W., Husbands, S., Bailey, C., Kelly,  
16 E., and Henderson, G. (2018). The novel mu-opioid receptor agonist PZM21 depresses  
17 respiration and induces tolerance to antinociception. *Br J Pharmacol* *175*, 2653-2661.
- 18 Hoepfner, C.Z., Cheng, N., and Ye, R.D. (2012). Identification of a nuclear localization  
19 sequence in beta-arrestin-1 and its functional implications. *J Biol Chem* *287*, 8932-8943.
- 20 Huang, B., Li, Y., Cheng, D., He, G., Liu, X., and Ma, L. (2018). beta-Arrestin-biased beta-  
21 adrenergic signaling promotes extinction learning of cocaine reward memory. *Sci Signal* *11*.
- 22 Janak, P.H., and Tye, K.M. (2015). From circuits to behaviour in the amygdala. *Nature* *517*,  
23 284-292.
- 24 Jimenez, J.C., Su, K., Goldberg, A.R., Luna, V.M., Biane, J.S., Ordek, G., Zhou, P., Ong,  
25 S.K., Wright, M.A., Zweifel, L., *et al.* (2018). Anxiety Cells in a Hippocampal-Hypothalamic  
26 Circuit. *Neuron* *97*, 670-683 e676.
- 27 Kang, J., Shi, Y., Xiang, B., Qu, B., Su, W., Zhu, M., Zhang, M., Bao, G., Wang, F., Zhang,  
28 X., *et al.* (2005). A nuclear function of beta-arrestin1 in GPCR signaling: regulation of  
29 histone acetylation and gene transcription. *Cell* *123*, 833-847.
- 30 Kheirbek, M.A., Drew, L.J., Burghardt, N.S., Costantini, D.O., Tannenholz, L., Ahmari, S.E.,  
31 Zeng, H., Fenton, A.A., and Hen, R. (2013). Differential control of learning and anxiety  
32 along the dorsoventral axis of the dentate gyrus. *Neuron* *77*, 955-968.

- 1 Kim, J.W., Ko, M.J., Gonzales, E.L., Kang, R.J., Kim, D.G., Kim, Y., Seung, H., Oh, H.A.,  
2 Eun, P.H., and Shin, C.Y. (2018). Social support rescues acute stress-induced cognitive  
3 impairments by modulating ERK1/2 phosphorylation in adolescent mice. *Sci Rep* 8, 12003.
- 4 Kindt, M., Soeter, M., and Vervliet, B. (2009). Beyond extinction: erasing human fear  
5 responses and preventing the return of fear. *Nat Neurosci* 12, 256-258.
- 6 Klee, W.A., Simonds, W.F., Sweat, F.W., Burke, T.R., Jr., Jacobson, A.E., and Rice, K.C.  
7 (1982). Identification of a Mr 58 000 glycoprotein subunit of the opiate receptor. *FEBS Lett*  
8 150, 125-128.
- 9 Kliewer, A., Schmiedel, F., Sianati, S., Bailey, A., Bateman, J.T., Levitt, E.S., Williams, J.T.,  
10 Christie, M.J., and Schulz, S. (2019). Phosphorylation-deficient G-protein-biased mu-opioid  
11 receptors improve analgesia and diminish tolerance but worsen opioid side effects. *Nat*  
12 *Commun* 10, 367.
- 13 Ko, M.J., Mulia, G.E., and van Rijn, R.M. (2019). Commonly Used Anesthesia/Euthanasia  
14 Methods for Brain Collection Differentially Impact MAPK Activity in Male and Female  
15 C57BL/6 Mice. *Front Cell Neurosci* 13, 96.
- 16 Kung, J.C., Chen, T.C., Shyu, B.C., Hsiao, S., and Huang, A.C. (2010). Anxiety- and  
17 depressive-like responses and c-fos activity in preproenkephalin knockout mice:  
18 oversensitivity hypothesis of enkephalin deficit-induced posttraumatic stress disorder. *J*  
19 *Biomed Sci* 17, 29.
- 20 LaLumiere, R.T., Nawar, E.M., and McGaugh, J.L. (2005). Modulation of memory  
21 consolidation by the basolateral amygdala or nucleus accumbens shell requires concurrent  
22 dopamine receptor activation in both brain regions. *Learn Mem* 12, 296-301.
- 23 Land, B.B., Bruchas, M.R., Schattauer, S., Giardino, W.J., Aita, M., Messinger, D., Hnasko,  
24 T.S., Palmiter, R.D., and Chavkin, C. (2009). Activation of the kappa opioid receptor in the  
25 dorsal raphe nucleus mediates the aversive effects of stress and reinstates drug seeking. *Proc*  
26 *Natl Acad Sci U S A* 106, 19168-19173.
- 27 Latapy, C., and Beaulieu, J.M. (2013). beta-Arrestins in the central nervous system. *Prog Mol*  
28 *Biol Transl Sci* 118, 267-295.
- 29 Lefkowitz, R.J., and Shenoy, S.K. (2005). Transduction of receptor signals by beta-arrestins.  
30 *Science* 308, 512-517.
- 31 Li, Y., Li, H., Liu, X., Bao, G., Tao, Y., Wu, Z., Xia, P., Wu, C., Li, B., and Ma, L. (2009).  
32 Regulation of amygdalar PKA by beta-arrestin-2/phosphodiesterase-4 complex is critical for  
33 fear conditioning. *Proc Natl Acad Sci U S A* 106, 21918-21923.

- 1 Lohse, M.J., Benovic, J.L., Codina, J., Caron, M.G., and Lefkowitz, R.J. (1990). beta-
- 2 Arrestin: a protein that regulates beta-adrenergic receptor function. *Science* 248, 1547-1550.
- 3 Manglik, A., Lin, H., Aryal, D.K., McCorvy, J.D., Dengler, D., Corder, G., Levit, A., Kling,
- 4 R.C., Bernat, V., Hubner, H., *et al.* (2016). Structure-based discovery of opioid analgesics
- 5 with reduced side effects. *Nature* 537, 185-190.
- 6 Mansour, A., Khachaturian, H., Lewis, M.E., Akil, H., and Watson, S.J. (1987).
- 7 Autoradiographic differentiation of mu, delta, and kappa opioid receptors in the rat forebrain
- 8 and midbrain. *J Neurosci* 7, 2445-2464.
- 9 Massaly, N., Copits, B.A., Wilson-Poe, A.R., Hipolito, L., Markovic, T., Yoon, H.J., Liu, S.,
- 10 Walicki, M.C., Bhatti, D.L., Sirohi, S., *et al.* (2019). Pain-Induced Negative Affect Is
- 11 Mediated via Recruitment of The Nucleus Accumbens Kappa Opioid System. *Neuron* 102,
- 12 564-573 e566.
- 13 Melia, K.R., Falls, W.A., and Davis, M. (1992). Involvement of pertussis toxin sensitive G-
- 14 proteins in conditioned fear-potentiated startle: possible involvement of the amygdala. *Brain*
- 15 *Res* 584, 141-148.
- 16 Mores, K.L., Cummins, B.R., Cassell, R.J., and van Rijn, R.M. (2019). A Review of the
- 17 Therapeutic Potential of Recently Developed G Protein-Biased Kappa Agonists. *Front*
- 18 *Pharmacol* 10, 407.
- 19 Morgan, M.A., and Pfaff, D.W. (2002). Estrogen's effects on activity, anxiety, and fear in two
- 20 mouse strains. *Behav Brain Res* 132, 85-93.
- 21 Narita, M., Kaneko, C., Miyoshi, K., Nagumo, Y., Kuzumaki, N., Nakajima, M., Nanjo, K.,
- 22 Matsuzawa, K., Yamazaki, M., and Suzuki, T. (2006). Chronic pain induces anxiety with
- 23 concomitant changes in opioidergic function in the amygdala. *Neuropsychopharmacology* 31,
- 24 739-750.
- 25 O'Brien, W.T., Huang, J., Buccafusca, R., Garskof, J., Valvezan, A.J., Berry, G.T., and Klein,
- 26 P.S. (2011). Glycogen synthase kinase-3 is essential for beta-arrestin-2 complex formation
- 27 and lithium-sensitive behaviors in mice. *J Clin Invest* 121, 3756-3762.
- 28 Paxinos, G., and Franklin, K.B. (2004). *The mouse brain in stereotaxic coordinates* (Gulf
- 29 professional publishing).
- 30 Perrine, S.A., Hoshaw, B.A., and Unterwald, E.M. (2006). Delta opioid receptor ligands
- 31 modulate anxiety-like behaviors in the rat. *Br J Pharmacol* 147, 864-872.
- 32 Pradhan, A.A., Befort, K., Nozaki, C., Gaveriaux-Ruff, C., and Kieffer, B.L. (2011). The
- 33 delta opioid receptor: an evolving target for the treatment of brain disorders. *Trends*
- 34 *Pharmacol Sci* 32, 581-590.



- 1 Pradhan, A.A., Perroy, J., Walwyn, W.M., Smith, M.L., Vicente-Sanchez, A., Segura, L.,
- 2 Bana, A., Kieffer, B.L., and Evans, C.J. (2016). Agonist-Specific Recruitment of Arrestin
- 3 Isoforms Differentially Modify Delta Opioid Receptor Function. *J Neurosci* 36, 3541-3551.
- 4 Raehal, K.M., and Bohn, L.M. (2011). The role of beta-arrestin2 in the severity of
- 5 antinociceptive tolerance and physical dependence induced by different opioid pain
- 6 therapeutics. *Neuropharmacology* 60, 58-65.
- 7 Raehal, K.M., Walker, J.K., and Bohn, L.M. (2005). Morphine side effects in beta-arrestin 2
- 8 knockout mice. *J Pharmacol Exp Ther* 314, 1195-1201.
- 9 Ragnauth, A., Schuller, A., Morgan, M., Chan, J., Ogawa, S., Pintar, J., Bodnar, R.J., and
- 10 Pfaff, D.W. (2001). Female preproenkephalin-knockout mice display altered emotional
- 11 responses. *Proc Natl Acad Sci U S A* 98, 1958-1963.
- 12 Richards, E.M., Mathews, D.C., Luckenbaugh, D.A., Ionescu, D.F., Machado-Vieira, R.,
- 13 Niciu, M.J., Duncan, W.C., Nolan, N.M., Franco-Chaves, J.A., Hudzik, T., *et al.* (2016). A
- 14 randomized, placebo-controlled pilot trial of the delta opioid receptor agonist AZD2327 in
- 15 anxious depression. *Psychopharmacology (Berl)* 233, 1119-1130.
- 16 Robins, M.T., Chiang, T., Berry, J.N., Ko, M.J., Ha, J.E., and van Rijn, R.M. (2018a).
- 17 Behavioral Characterization of beta-Arrestin 1 Knockout Mice in Anxiety-Like and Alcohol
- 18 Behaviors. *Front Behav Neurosci* 12, 54.
- 19 Robins, M.T., Chiang, T., Mores, K.L., Alongkronrusmee, D., and van Rijn, R.M. (2018b).
- 20 Critical Role for Gi/o-Protein Activity in the Dorsal Striatum in the Reduction of Voluntary
- 21 Alcohol Intake in C57Bl/6 Mice. *Front Psychiatry* 9, 112.
- 22 Rozenfeld, R., and Devi, L.A. (2007). Receptor heterodimerization leads to a switch in
- 23 signaling: beta-arrestin2-mediated ERK activation by mu-delta opioid receptor heterodimers.
- 24 *FASEB J* 21, 2455-2465.
- 25 Saitoh, A., Kimura, Y., Suzuki, T., Kawai, K., Nagase, H., and Kamei, J. (2004). Potential
- 26 anxiolytic and antidepressant-like activities of SNC80, a selective delta-opioid agonist, in
- 27 behavioral models in rodents. *J Pharmacol Sci* 95, 374-380.
- 28 Saitoh, A., Suzuki, S., Soda, A., Ohashi, M., Yamada, M., Oka, J.I., Nagase, H., and Yamada,
- 29 M. (2018). The delta opioid receptor agonist KNT-127 in the prelimbic medial prefrontal
- 30 cortex attenuates veratrine-induced anxiety-like behaviors in mice. *Behav Brain Res* 336, 77-
- 31 84.
- 32 Shi, Y., Feng, Y., Kang, J., Liu, C., Li, Z., Li, D., Cao, W., Qiu, J., Guo, Z., Bi, E., *et al.*
- 33 (2007). Critical regulation of CD4<sup>+</sup> T cell survival and autoimmunity by beta-arrestin 1. *Nat*
- 34 *Immunol* 8, 817-824.

- 1 Solati, J., Zarrindast, M.R., and Salari, A.A. (2010). Dorsal hippocampal opioidergic system  
2 modulates anxiety-like behaviors in adult male Wistar rats. *Psychiatry Clin Neurosci* *64*, 634-  
3 641.
- 4 Sugiyama, A., Yamada, M., Furuie, H., Gotoh, L., Saitoh, A., Nagase, H., Oka, J.I., and  
5 Yamada, M. (2019). Systemic administration of a delta opioid receptor agonist, KNT-127,  
6 facilitates extinction learning of fear memory in rats. *J Pharmacol Sci* *139*, 174-179.
- 7 Takahashi, L.K. (2001). Role of CRF(1) and CRF(2) receptors in fear and anxiety. *Neurosci*  
8 *Biobehav Rev* *25*, 627-636.
- 9 Terburg, D., Scheggia, D., Triana Del Rio, R., Klumpers, F., Ciobanu, A.C., Morgan, B.,  
10 Montoya, E.R., Bos, P.A., Giobellina, G., van den Burg, E.H., *et al.* (2018). The Basolateral  
11 Amygdala Is Essential for Rapid Escape: A Human and Rodent Study. *Cell* *175*, 723-735  
12 e716.
- 13 Tohgo, A., Pierce, K.L., Choy, E.W., Lefkowitz, R.J., and Luttrell, L.M. (2002). beta-  
14 Arrestin scaffolding of the ERK cascade enhances cytosolic ERK activity but inhibits ERK-  
15 mediated transcription following angiotensin AT1a receptor stimulation. *J Biol Chem* *277*,  
16 9429-9436.
- 17 Tovote, P., Fadok, J.P., and Luthi, A. (2015). Neuronal circuits for fear and anxiety. *Nat Rev*  
18 *Neurosci* *16*, 317-331.
- 19 Tye, K.M., Prakash, R., Kim, S.Y., Fenno, L.E., Grosenick, L., Zarabi, H., Thompson, K.R.,  
20 Gradinaru, V., Ramakrishnan, C., and Deisseroth, K. (2011). Amygdala circuitry mediating  
21 reversible and bidirectional control of anxiety. *Nature* *471*, 358-362.
- 22 van Rijn, R.M., Brissett, D.I., and Whistler, J.L. (2010). Dual efficacy of delta opioid  
23 receptor-selective ligands for ethanol drinking and anxiety. *J Pharmacol Exp Ther* *335*, 133-  
24 139.
- 25 Vicente-Sanchez, A., Dripps, I.J., Tipton, A.F., Akbari, H., Akbari, A., Jutkiewicz, E.M., and  
26 Pradhan, A.A. (2018). Tolerance to high-internalizing delta opioid receptor agonist is  
27 critically mediated by arrestin 2. *Br J Pharmacol* *175*, 3050-3059.
- 28 Walker, D.L., and Davis, M. (2002). Quantifying fear potentiated startle using absolute  
29 versus proportional increase scoring methods: implications for the neurocircuitry of fear and  
30 anxiety. *Psychopharmacology (Berl)* *164*, 318-328.
- 31 Whalen, E.J., Rajagopal, S., and Lefkowitz, R.J. (2011). Therapeutic potential of beta-  
32 arrestin- and G protein-biased agonists. *Trends Mol Med* *17*, 126-139.

- 1 Zurkovsky, L., Sedaghat, K., Ahmed, M.R., Gurevich, V.V., and Gurevich, E.V. (2017).
- 2 Arrestin-2 and arrestin-3 differentially modulate locomotor responses and sensitization to
- 3 amphetamine. *Neuropharmacology* *121*, 20-29.
- 4

# Figure 1

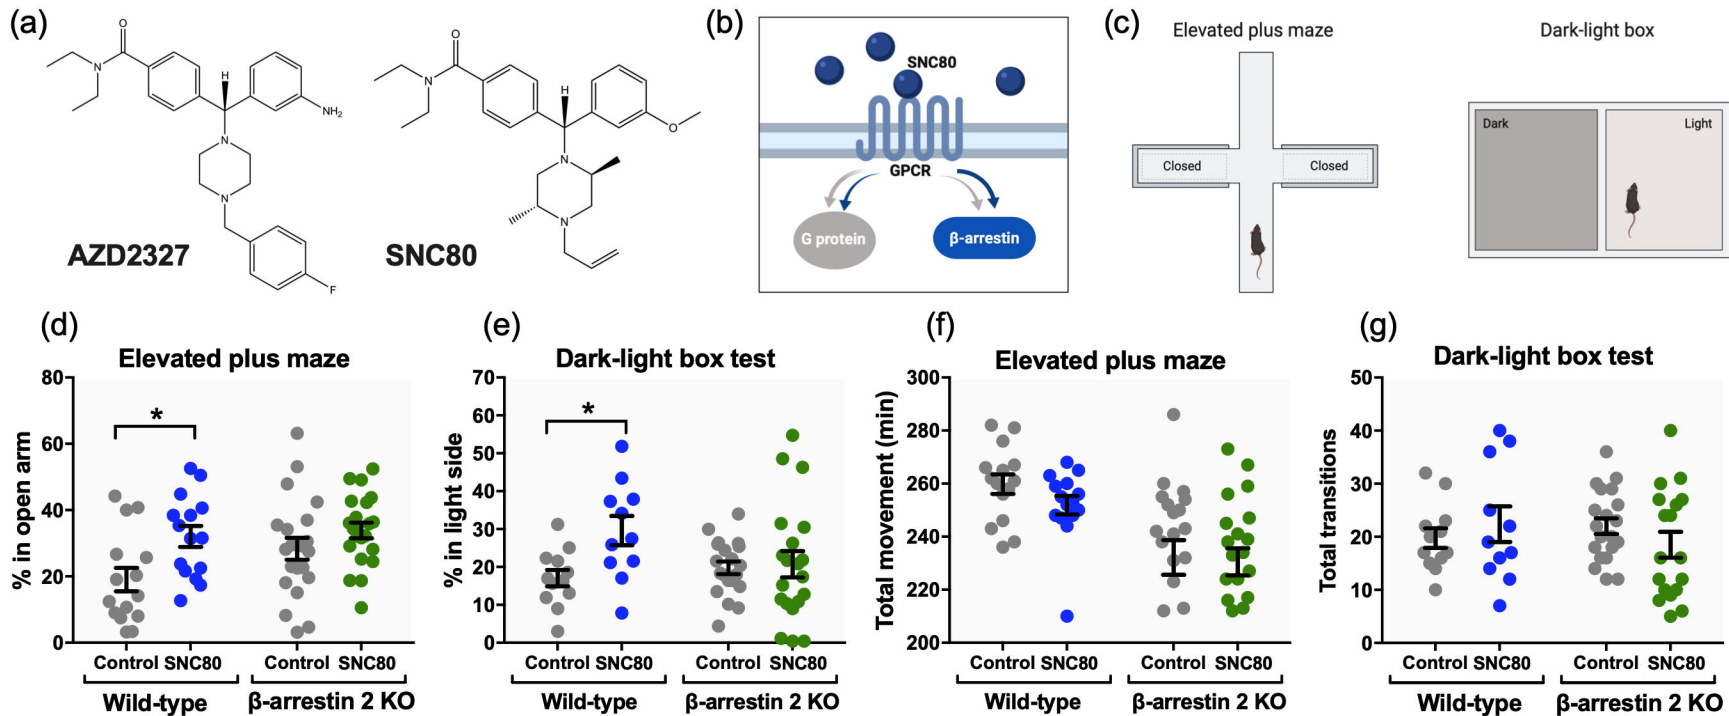

# Figure 2

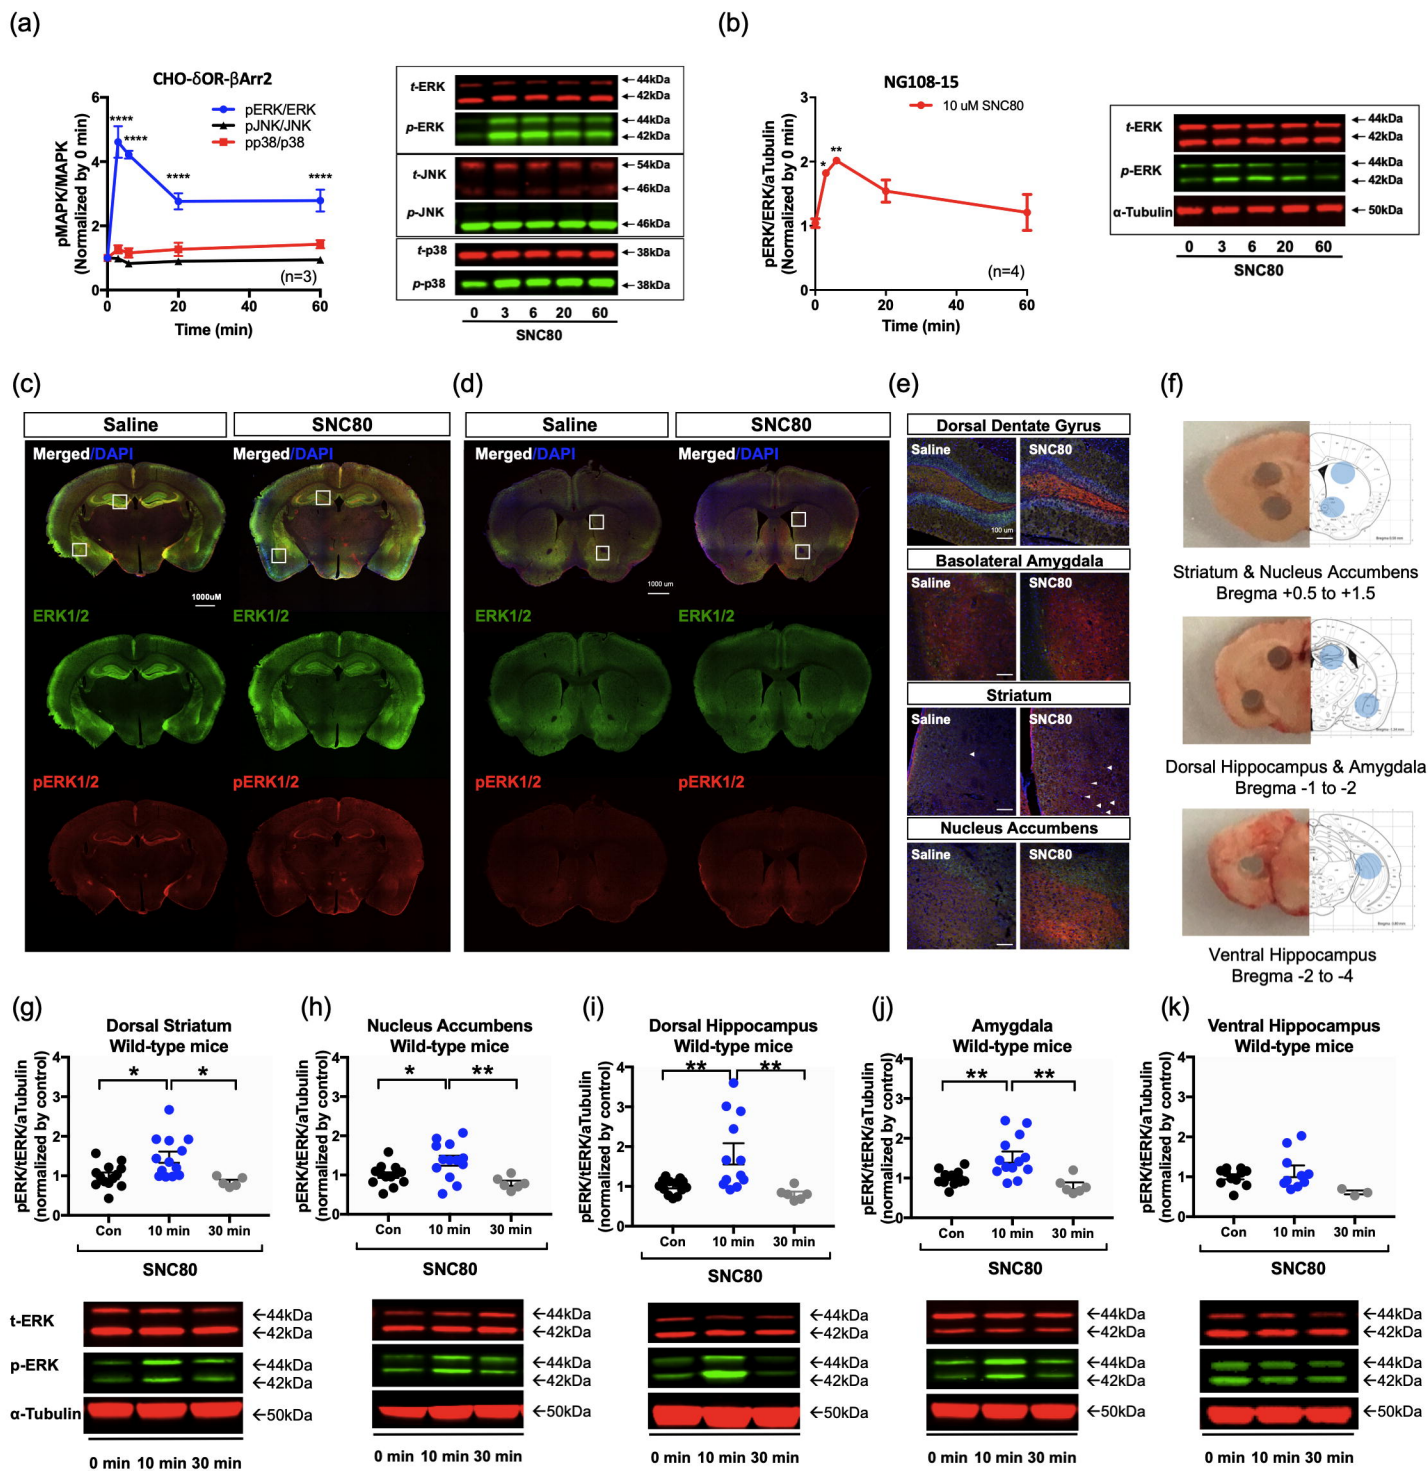

# Figure 3

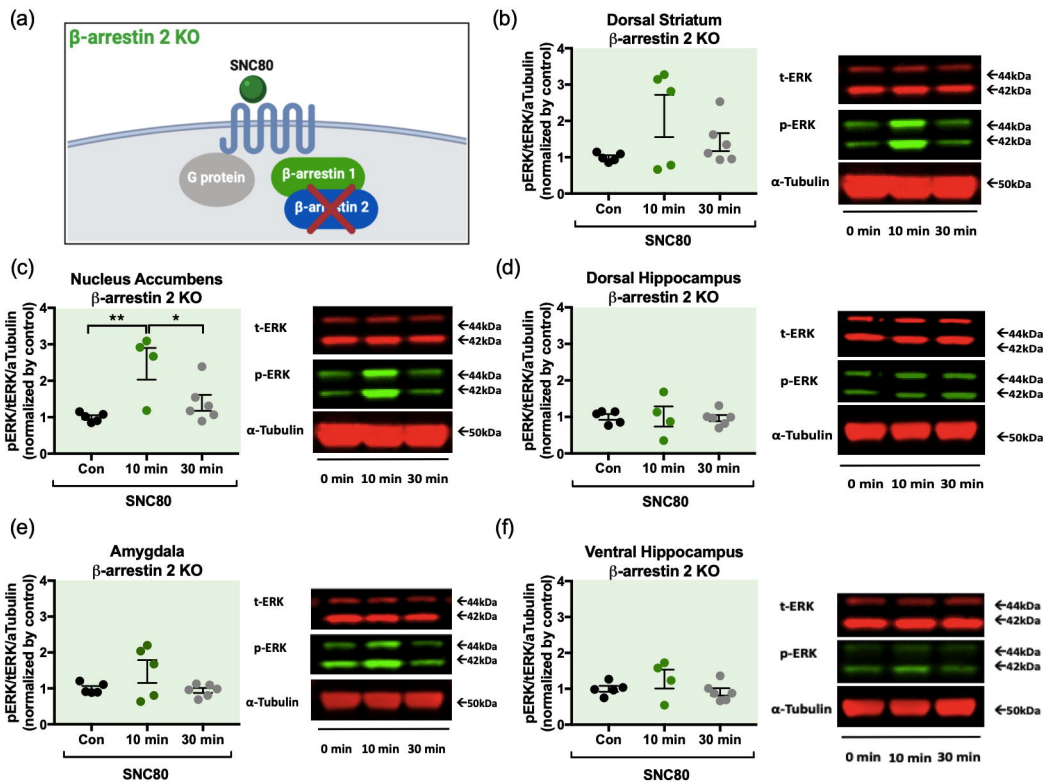

# Figure 4

(a)

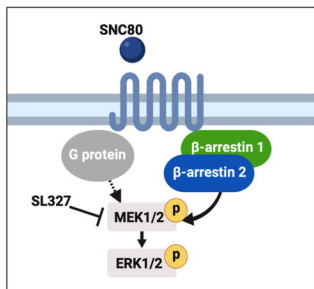

(b)

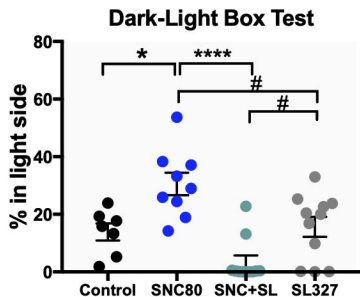

(c)

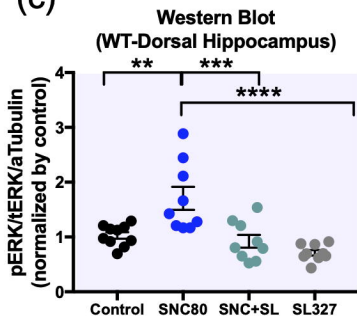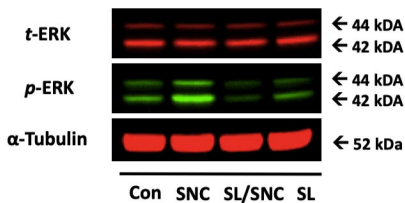

(d)

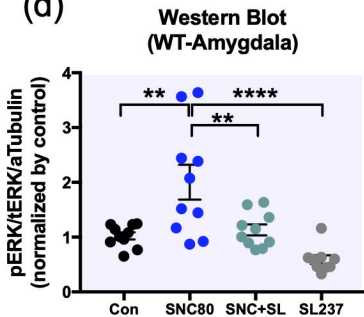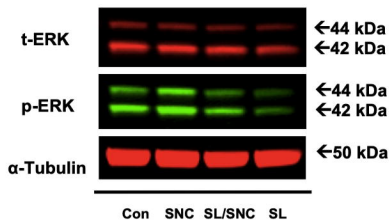

# Figure 5

(a)

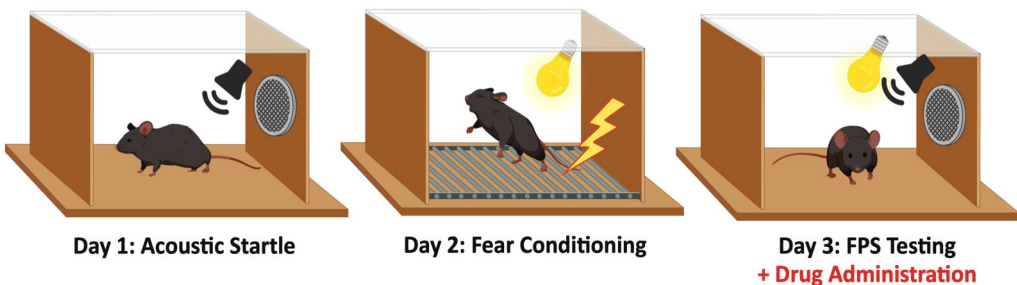

(b)

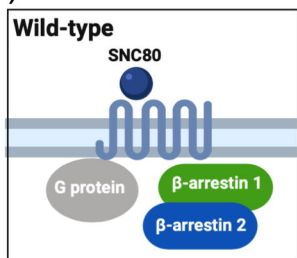

(c)

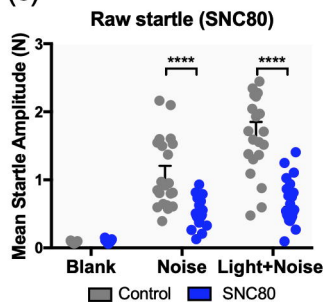

(d)

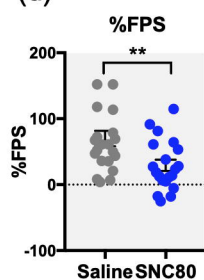

(e)

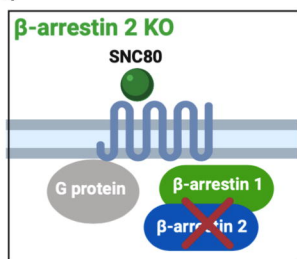

(f)

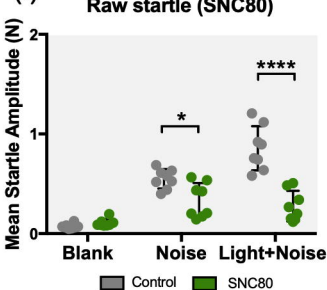

(g)

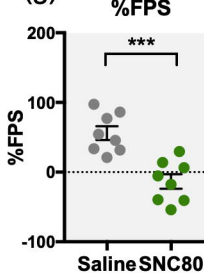

(h)

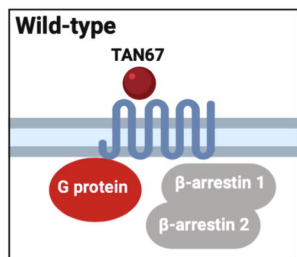

(i)

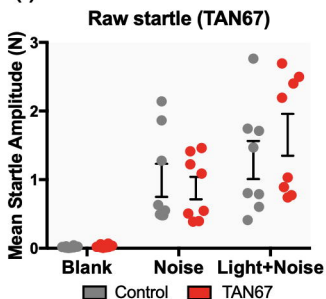

(j)

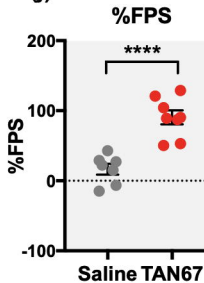



# Figure 6

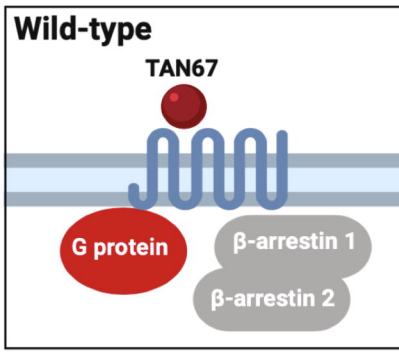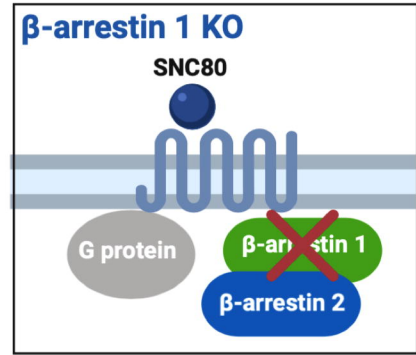

Wild-type

β-arrestin 1 KO

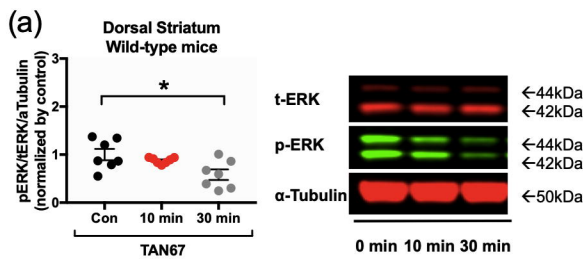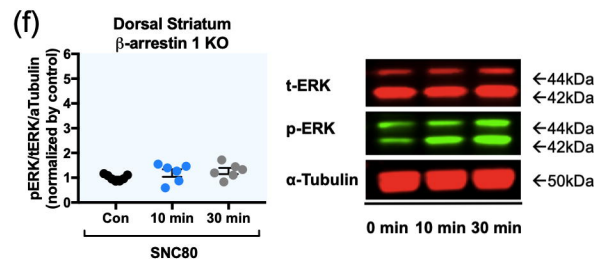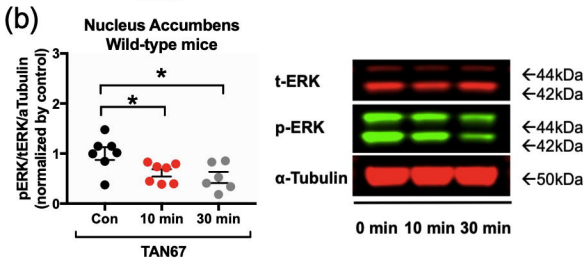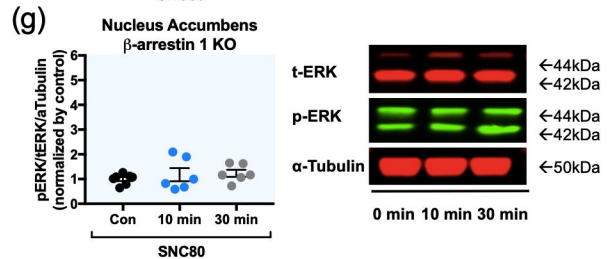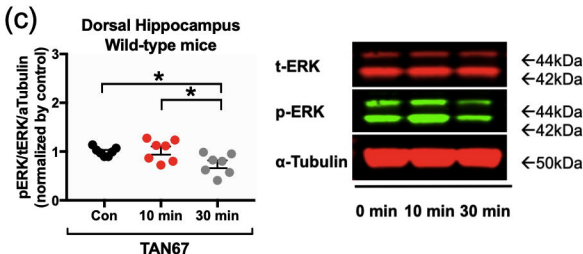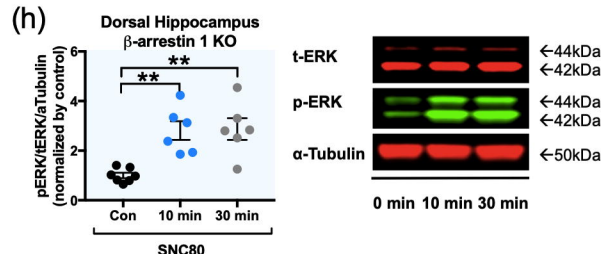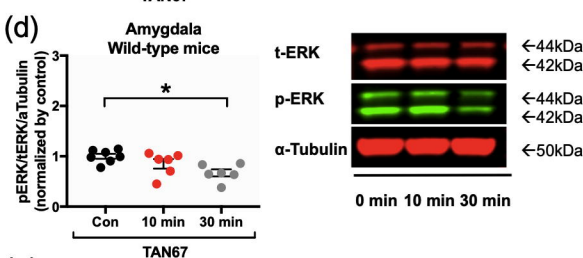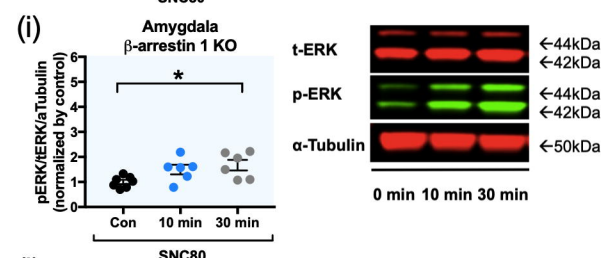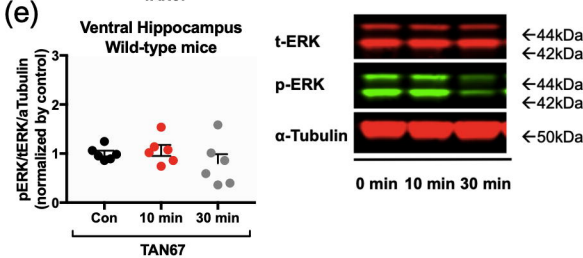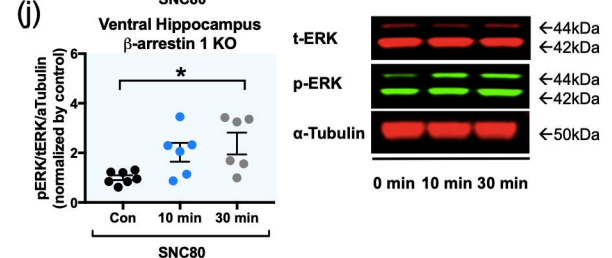

Figure 7

| Localization                                                                                                                                      | Cellular Makeup                                                 | Behavior                                |
|---------------------------------------------------------------------------------------------------------------------------------------------------|-----------------------------------------------------------------|-----------------------------------------|
| <p><b>a</b> Dorsal Hippocampus &amp; Amygdala</p> 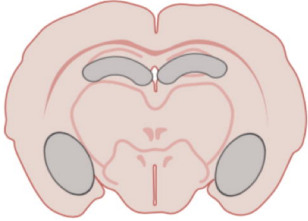               | <p>SNC80</p> <p>G protein</p> <p>β-arrestin 2</p> <p>ERK1/2</p> | <p>Decreased anxiety-like behavior</p>  |
| <p><b>b</b> All tested regions (Except for the ventral hip)</p>  | <p>TAN67</p> <p>G protein</p> <p>β-arrestin</p> <p>ERK1/2</p>   | <p>Increased fear-related behavior</p>  |
| <p><b>c</b> Striatum &amp; Nucleus Accumbens</p>               | <p>SNC80</p> <p>G protein</p> <p>β-arrestin 1</p> <p>ERK1/2</p> | <p>Decreased fear-related behavior?</p> |
