1 **Title page**

2 **Title:**  $\beta$ -arrestin-dependent ERK signaling positively correlates with reduced anxiety-like and  
3 conditioned fear-related behavior in mice.

4

5 **Authors:** Mee Jung Ko<sup>1,3,4</sup>, Terrance Chiang<sup>1†</sup>, Arbaaz A. Mukadam<sup>1,2</sup>, Grace E. Mulia<sup>1,4</sup>, Anna  
6 M. Gutridge<sup>1,3</sup>, Angel Lin<sup>1</sup>, Julia A. Chester<sup>2,3,4</sup>, Richard M. van Rijn<sup>1,3,4,5\*</sup>

7

8 **Affiliations:**

9 <sup>1</sup>Department of Medicinal Chemistry and Molecular Pharmacology, College of Pharmacy, Purdue  
10 University, West Lafayette, IN, 47907, USA

11 <sup>2</sup>Department of Psychological Sciences, College of Health and Human Sciences, Purdue  
12 University, West Lafayette, IN, 47907, USA

13 <sup>3</sup>Purdue Institute for Integrative Neuroscience, West Lafayette, IN, 47907, USA

14 <sup>4</sup>Purdue Interdisciplinary Life Sciences Graduate Program, West Lafayette, IN, 47907, USA

15 <sup>5</sup>Purdue Institute for Drug Discovery, West Lafayette, IN, 47907, USA

16 †Current address: Department of Neurosurgery, Stanford University School of Medicine, Palo  
17 Alto, CA 94305

18 \*Corresponding author: [rvanrijn@purdue.edu](mailto:rvanrijn@purdue.edu)

19

20 **One sentence summary:** Using pharmacological and genetic strategies, we reveal the importance  
21 of non-canonical  $\beta$ -arrestin-mediated G protein-coupled receptor signaling in anxiety-like  
22 behaviors.

23

1 **Abstract**

2 Exposure to anxiety- or fear-invoking stimuli initiates a convergence of executive actions  
3 orchestrated by multiple proteins and neurotransmitters across the brain. Dozens of G protein-  
4 coupled receptors (GPCRs) have been linked to regulation of fear and anxiety. GPCR signaling  
5 involves canonical G protein pathways but may also engage downstream kinases and effectors  
6 through  $\beta$ -arrestin scaffolds. Here, we investigate whether  $\beta$ -arrestin signaling can regulate  
7 anxiety-like and fear-related behavior. Using the  $\delta$ -opioid receptor ( $\delta$ OR) as a model GPCR, we  
8 found that  $\beta$ -arrestin 2-dependent activation of extracellular signal-regulated kinases (ERK1/2) in  
9 the dorsal hippocampus and the amygdala are critical for  $\delta$ OR agonist-induced anxiolytic-like  
10 effects. In contrast, G protein-mediated  $\delta$ OR signaling was associated with decreased ERK1/2  
11 activity and increased fear-related behavior. Our results also indicate unique contributions for  $\beta$ -  
12 arrestin isoforms in modulation of anxiety-like and fear-related behavior. Overall, our findings  
13 highlight the significance of non-canonical  $\beta$ -arrestin signaling in the regulation of emotions.

## 1 Introduction

2 Anxiety- and fear-related behaviors are evolutionary adaptive behaviors important for  
3 human survival. However, excessive stimulation of the neural circuits that regulate anxiety- and  
4 fear-related behaviors can manifest as psychiatric disorders, such as post-traumatic stress disorder  
5 and phobias. The expression of anxiety- and fear-related behaviors is regulated by complex  
6 integration of both internal and external physiological and sensory cues that influence reflexive  
7 behavior, cognitive control, and executive functions. Accordingly, behavioral correlates of anxiety  
8 and fear are regulated by a harmonious activity of neurotransmitters and cellular actions across  
9 many overlapping and distinct neural circuits (1).

10 With regard to cellular actions underlying (patho-)physiological behavior, G protein-  
11 coupled receptors (GPCRs) play an important role in neuronal signaling. GPCRs bind  
12 neurotransmitters and initiate intracellular signal transduction pathways which ultimately affect  
13 neuronal excitability, neurotransmitter release and synaptic plasticity. GPCRs, including  
14 serotonergic (2), dopaminergic (3), adrenergic (4), opioidergic (5) and corticotropin-releasing  
15 factor receptors (6) have well-documented roles in the modulation of anxiety and fear and thus are  
16 exciting drug targets to treat anxiety disorders.

17 Although drug development at GPCRs has traditionally focused on the canonical G protein  
18 pathways, the prior two decades have introduced arrestin-dependent signaling as a new concept of  
19 GPCR signal transduction. In particular, the ‘non-visual’ arrestins 2 and 3, referred here as  $\beta$ -  
20 arrestin 1 and 2, respectively, have been studied for their ability to drive G-protein-independent  
21 signaling (7). The primary role of  $\beta$ -arrestins is to desensitize GPCRs, for example increases  $\beta$ -  
22 arrestin 2 expression in mice amygdala, caused by HIV1-tat infection, leads to significant  
23 reduction in morphine efficacy in this region (8). Beyond desensitization,  $\beta$ -arrestin 2 may also

1 partake in receptor signaling by scaffolding with various kinases. For example,  $\beta$ -arrestin 2 p38  
2 MAP kinase signaling has been linked to the aversive effects of  $\kappa$ -opioid receptor ( $\kappa$ OR) agonists  
3 (5, 9), whereas a  $\beta$ -arrestin 2-GSK3 $\beta$ /AKT scaffold appears to be driving the antipsychotic effects  
4 of dopamine D<sub>2</sub> receptors agonists (10, 11). Currently, few studies have investigated how signaling  
5 scaffolds involving the  $\beta$ -arrestin isoforms may influence anxiety- and fear-like behavior. It is  
6 important to begin to address this gap in our current knowledge of the GPCR modulation of  
7 psychiatric behavior, especially since the majority of medications that target GPCRs were  
8 developed without consideration of the potential adverse or therapeutic effects of  $\beta$ -arrestin  
9 signaling. Yet, it is now possible to develop molecules that preferentially activate or avoid  $\beta$ -  
10 arrestin signaling and thus have the potential to treat psychiatric disorders more effectively and  
11 with a wider therapeutic window (12, 13).

12 Here, we describe our efforts to elucidate the roles of  $\beta$ -arrestin isoforms in mediating  
13 GPCR signaling in relation to the modulation of anxiety and fear-like behavior. We chose to utilize  
14 the  $\delta$ -opioid receptor ( $\delta$ OR) as a model GPCR for multiple reasons. Previous studies have shown  
15 that the  $\delta$ OR selective agonist SNC80 is an efficacious recruiter of  $\beta$ -arrestin 1 and 2 proteins (14-  
16 16), and has anxiolytic-like (17, 18) and fear-reducing effects (17, 19). Moreover, the  $\delta$ OR-  
17 selective agonist TAN67, which is a poor  $\beta$ -arrestin 2 recruiter does not reduce anxiety-like  
18 behavior in naïve mice (20), providing support for our hypothesis that  $\beta$ -arrestin 2 signaling is  
19 correlated with and reduced anxiety-like behavior.

20 Mitogen activated protein kinases (MAPKs) have been implicated with mood disorders  
21 and can scaffold with  $\beta$ -arrestin (21, 22). Studies have suggested that MAPK signaling, specifically  
22 ERK1/2, in the hippocampus and the basolateral amygdala is required for the acquisition and  
23 extinction of fear memory (23, 24). Therefore, we further hypothesize that  $\beta$ -arrestin-dependent

1 MAPK signaling may contribute to anxiety-like and fear-related behavior. To test our hypotheses,  
2 we assessed the degree to which  $\beta$ -arrestin isoforms and MAPK activation were involved in  $\delta$ OR  
3 agonist-mediated modulation of unconditioned anxiety-related behavior and cued-induced fear-  
4 related behavior. Our results suggest that ERK1/2 activity is differentially modulated by G protein  
5 and  $\beta$ -arrestin signaling and is correlated with anxiety-like and fear-related responses in C57BL/6  
6 mice. We noted that different  $\beta$ -arrestin isoforms were involved in the activation of ERK1/2 across  
7 various brain regions, including the striatum, hippocampus and amygdala.

8

9

## Results

10 **Involvement of  $\beta$ -arrestin 2 in the modulation of anxiety-like behavior** In 2016, Astra Zeneca  
11 revealed that their novel  $\delta$ OR-selective agonist AZD2327 (**Fig. 1a**) was capable of reducing  
12 anxiety-like behavior in mice (25). While AZD2327 is not commercially available it is structurally  
13 similar to SNC80, a commercially available  $\delta$ OR-selective agonist (**Fig. 1a**). SNC80 is a known  
14 super-recruiter of  $\beta$ -arrestin 2 (14) (**Fig. 1b**) and similar to AZD2327 exhibits anxiolytic-like  
15 effects in rodents (17, 20). These previous findings led us to hypothesize that  $\beta$ -arrestin 2 may be  
16 required for the anxiolytic effects of SNC80 and AZD2327. Using two models of anxiety-like  
17 behavior, the elevated plus maze (EPM) test and dark-light box transition test (**Fig. 1c**), we  
18 measured the behavioral effects of SNC80 in  $\beta$ -arrestin 2 KO mice at a dose known to produce  
19 anxiolytic-like effects in wild-type (WT) mice (20). As expected, systemic administration of  
20 SNC80 (20 mg/kg, s.c.) significantly increased the time WT mice spent in the open arm of the  
21 elevated plus maze (**Fig. 1d**; see **Table S1** for two-way ANOVA and post-hoc multiple comparison)  
22 and the light chamber of dark-light transition box (**Fig. 1e**; see **Table S1** for two-way ANOVA  
23 and post-hoc multiple comparison). As we predicted, the anxiolytic effects of SNC80 were

1 attenuated in  $\beta$ -arrestin 2 KO mice (**Fig. 1d and e**; see **Table S1** for two-way ANOVA and post-  
2 hoc multiple comparison). Although the total movement in the elevated plus maze was slightly  
3 lower in  $\beta$ -arrestin 2 KO mice than WT mice, no drug effects were observed in both genotypes  
4 (**Fig. 1f**; see **Table S1** for two-way ANOVA and post-hoc multiple comparison). Likewise, no  
5 statistical difference in total transition was observed in the dark light transition box test (**Fig. 1g**  
6 see **Table S1** for two-way ANOVA and post-hoc multiple comparison); however, as previously  
7 described, SNC80 produced hyperlocomotive behavior in mice ((14), **Fig. S1**, see **Table S1** for  
8 detailed statistics).

9  
10 **The  $\beta$ -arrestin recruiting  $\delta$ OR agonist SNC80 strongly activates ERK1/2 in vitro and in vivo**

11 Activation of  $\kappa$ OR has been associated with  $\beta$ -arrestin 2-mediated p38 phosphorylation (9). To  
12 determine if  $\delta$ OR agonism similarly stimulates mitogen-activated protein kinases (MAPKs), we  
13 measured p38, JNK, and ERK1/2 activation in Chinese Hamster Ovarian cells stably expressing  
14  $\delta$ OR and  $\beta$ -arrestin 2 (CHO- $\delta$ OR- $\beta$ Arr2) following stimulation with 10  $\mu$ M SNC80, a  
15 concentration that will fully activate G-protein signaling and induce  $\beta$ -arrestin 2 recruitment (26).  
16 We found that SNC80 led to a rapid increase in ERK1/2 phosphorylation within 3 minutes in  
17 CHO- $\delta$ OR- $\beta$ Arr2 cells, which lasted until 60 minutes, in agreement with previous  $\delta$ OR-mediated  
18 ERK activation in CHO cells (27). We did not observe strong activation of p38 and JNK by SNC80  
19 (**Fig. 2a**). The  $\delta$ OR mediated ERK1/2 signaling in these cells were not an artifact of the  
20 recombinant overexpression of  $\delta$ OR and  $\beta$ -arrestin 2 in the CHO cells as we observed a similar  
21 profile for ERK1/2 activation in NG108-15 neuroblastoma cells endogenously expressing  $\delta$ OR  
22 and  $\beta$ -arrestin (28-30) (**Fig. 2b**). We similarly found ERK1/2 activation in several mouse brain  
23 regions, known to express  $\delta$ ORs, including the dorsal hippocampus, the amygdala and the striatum

1 (31, 32) (**Fig. 2c**). The SNC80-induced ERK1/2 activation in these regions was confirmed and  
2 quantified by the Western blot analysis of flash-frozen tissue punches upon collection (**Fig. 2d**).  
3 Here, we observed that SNC80 (20 mg/kg, i.p.) significantly increased ERK1/2 phosphorylation  
4 at the 10-minute time-point in all tested brain regions except for the ventral hippocampus of WT  
5 mice (**Fig. 2e-i**; see **Table S2** for one-way ANOVA and post-hoc multiple comparison), and these  
6 activations returned to basal levels 30 minutes after the SNC80 administration. The SNC80-  
7 induced ERK1/2 activation was not observed in the dorsal hippocampus and the amygdala of  $\delta$ OR  
8 KO mice (**Fig. S2**), further confirming this unique profile of ERK1/2 activation by SNC80 is  
9 mediated by  $\delta$ OR.

10

11  **$\beta$ -arrestin 2 is required to activate ERK1/2 signaling in the limbic structures of the brain** To  
12 determine if  $\beta$ -arrestin 2 is responsible for the ERK1/2 activation observed in wild-type mice, we  
13 quantified ERK1/2 activation across the same hippocampal, striatal and amygdalar regions of  $\beta$ -  
14 arrestin 2 KO mice (**Fig. 3a**) upon systemic administration of SNC80 (20 mg/kg, i.p.) (**Fig. 3b**).  
15 While SNC80 still strongly activated ERK1/2 in the nucleus accumbens (**Fig. 3c**; see **Table S2** for  
16 one-way ANOVA and post-hoc multiple comparison) and revealed an increasing trend of ERK1/2  
17 activation in striatum (**Fig. 3b**; see **Table S2** for one-way ANOVA and post-hoc multiple  
18 comparison) of the  $\beta$ -arrestin 2 KO mice, we did not observe significant SNC80-induced ERK1/2  
19 activation in the dorsal hippocampus, the amygdala, and the dorsal hippocampus of  $\beta$ -arrestin 2  
20 KO mice (**Fig. 3e-g**; see **Table S2** for one-way ANOVA and post-hoc multiple comparison).

21

22 **ERK1/2 signaling plays a key role in the SNC80-mediated anxiolytic-like effects** We next  
23 assessed if the anxiolytic effects of SNC80 were dependent on ERK1/2 activation. We

1 administered wild-type mice with SL327 (50 mg/kg, s.c.), a MEK1/2 inhibitor that indirectly  
2 prevents ERK1/2 activation, (**Fig. 4a**) (33). We found that pre-administration of SL327 ablated  
3 the anxiolytic-like effects of SNC80 (20 mg/kg, i.p.) in WT mice (**Fig. 4b**; see **Table S3** for one-  
4 way ANOVA and post-hoc multiple comparison). The hippocampus is a brain region associated  
5 with anxiety-like behavior in the elevated plus maze (34) and  $\delta$ OR-agonism in the dorsal  
6 hippocampus, and the amygdala is associated with reduced anxiety-like behavior in the open field  
7 test (18, 35). These published findings agree with our observation of SNC80-induced  $\beta$ -arrestin 2-  
8 dependent ERK1/2 activity specifically in these two brain regions (**Fig. 3e,f**). Therefore, if the  $\beta$ -  
9 arrestin-mediated ERK1/2 signaling in these two regions was critical for the anxiolytic-like effects  
10 of SNC80, we would expect ERK1/2 activity to be abolished in these regions in the mice with  
11 SNC80 (20 mg/kg, i.p.) and SL327 (50 mg/kg, s.c.). Indeed, we found that SL327 effectively  
12 decreased SNC80-induced ERK1/2 activity in the dorsal hippocampus and the amygdala (**Fig.**  
13 **4c,d**, see **Table S3** for detailed statistics), but not in the dorsal striatum, the nucleus accumbens,  
14 and the ventral hippocampus (**Fig. S3**, see **Table S3** for detailed statistics). As an additional  
15 approach to investigate the importance of  $\beta$ -arrestin 2 signaling on ERK1/2 signaling and anxiety-  
16 like behavior, we utilized a  $\delta$ OR agonist that is a weaker  $\beta$ -arrestin recruiter than SNC80.  
17 Specifically, we utilized ADL5859, which affinity ( $K_i = 0.84$  nM) and G-protein potency ( $EC_{50} = 20$   
18 nM) at  $\delta$ OR is not significantly different from SNC80 ( $K_i = 1.2$  nM,  $EC_{50} = 10$  nM, (36)), but has  
19 50-fold lower potency ( $pEC_{50} = 6.6 \pm 0.1$ , **Fig. S4a**) and slightly lower efficacy ( $E_{max} = 119\% \pm 5$ ,  
20 relative to Leu-enkephalin **Fig. S4a**) than SNC80 ( $pEC_{50} = 8.2 \pm 0.1$ ,  $E_{max} = 142\% \pm 9$ , (14)). Systemic  
21 administration of ADL5859 (30 mg/kg, p.o.) at a dose that produces robust  $\delta$ OR-mediated  
22 analgesia (37) did not result in ERK1/2 activation in the dorsal hippocampus and the amygdala  
23 (**Fig. S4b,c**) nor reduce anxiety-like behavior (**Fig. S4d**), suggesting that ERK1/2 activation in the



1 dorsal hippocampus and the amygdala as well as  $\delta$ OR-mediated anxiolytic effects require a strong  
2 recruitment of  $\beta$ -arrestin 2.  
3  
4 **Fear-potentiated startle behavior is correlated with ERK1/2 activity but is not mediated by**  
5  **$\beta$ -arrestin 2.** Besides reducing anxiety-like behavior,  $\delta$ OR activation can also alleviate  
6 conditioned fear-related behavior (17, 38). Based on our results and previous studies, we  
7 hypothesized that SNC80 may similarly reduce fear-related behavior through a mechanism that  
8 involves  $\beta$ -arrestin 2. To measure conditioned fear, we utilized a mouse behavior paradigm of fear-  
9 potentiated startle (FPS) (Fig. 5a). Mice groups were counterbalanced, such that no significant  
10 differences between startle reflexes were observed between groups (Fig. S5). In WT mice (Fig.  
11 5b), we noted that SNC80 (20 mg/kg, i.p.) significantly reduced startle responses to the  
12 unconditioned ‘noise’ cue as well as to the conditioned ‘light+noise’ cue (Fig. 5c; see Table S4  
13 for two-way ANOVA and post-hoc multiple comparison). The reduction produced by ‘light+noise’  
14 is larger than the reduction produced by ‘noise’, and thus these reductions result in a significant  
15 reduction in % FPS response (Fig. 5d; p-value is indicated in figure legends). We also measured  
16 if SNC80 would alter %FPS at a dose of 10 mg/kg (i.p.), as this dose of SNC80 has been shown  
17 to be effective in other studies effect (17, 95), but in our hands we did not observe any significant  
18 effects (Fig. S6). To our surprise, we found that SNC80 was equally effective in reducing % FPS  
19 responses in  $\beta$ -arrestin 2 KO mice (Fig. 5e,f; see Table S4 for two-way ANOVA and post-hoc  
20 multiple comparison; Fig. 5g; p-value is indicated in figure legends). While SNC80 is a very  
21 efficacious recruiter of  $\beta$ -arrestin, it still also fully activates  $G_i$  protein signaling (14, 26). Thus, we  
22 next hypothesized that the observed fear-reducing effects of SNC80 could be mediated through  $G_i$   
23 protein signaling. To address this hypothesis, we utilized a  $\delta$ OR selective agonist, TAN67, which

1 is a very poor recruiter of  $\beta$ -arrestin, and considered  $G_i$  protein-biased (14, 26). However, when  
2 we administered TAN67 (25 mg/kg, i.p.) to our WT mice (Fig. 5h), TAN67 did not significantly  
3 change startle to the ‘noise’ or to the ‘light+noise’ stimuli (Fig. 5i; see Table S4 for two-way  
4 ANOVA). However, there was a significant increase in %FPS (Fig. 5j; p-value is indicated in  
5 figure legends). The lack of a direct effect of TAN67 on noise-alone startle is in agreement with  
6 our previous finding that TAN67 did not change basal anxiety-like behavior in the elevated plus  
7 maze and dark-light transition test (20). Our Western blot analysis of ERK1/2 activities in WT  
8 mice revealed that TAN67, decreased ERK1/2 phosphorylation in the dorsal striatum, the nucleus  
9 accumbens, the dorsal hippocampus, and the amygdala (Fig. 6a-d). In the ventral hippocampus,  
10 TAN67 did not alter ERK1/2 activity (Fig. 6e), which was similar to the lack of ERK1/2  
11 modulation by SNC80 in this region (Fig. 2i) and may be indicative of low  $\delta$ OR expression in the  
12 ventral region as previously described (39).

13

#### 14 **Potential roles for ERK1/2 and $\beta$ -arrestin 1 in the modulation of conditioned-fear behavior**

15 Our results suggest that SNC80 reduces conditioned fear through a mechanism that does not  
16 involve  $\beta$ -arrestin 2 or G protein signaling. Therefore, we next hypothesized that the effect may be  
17 mediated by  $\beta$ -arrestin 1 instead. SNC80 is a potent and efficacious recruiter of  $\beta$ -arrestin  
18 (pEC<sub>50</sub> = 7.9 ± 0.2, E<sub>max</sub> = 86% ± 5), particularly compared to TAN-67, which recruits  $\beta$ -arrestin  
19 1 with much lower efficacy (pEC<sub>50</sub> = 7.7 ± 0.4, E<sub>max</sub> = 14% ± 2) (Fig. S7). However, SNC80 is  
20 known to induce severe seizures in  $\beta$ -arrestin 1 KO mice (16), preventing us from testing the FPS  
21 response of SNC80 in this strain. Instead, we measured SNC80-induced ERK1/2 phosphorylation  
22 in the  $\beta$ -arrestin 1 KO mice. SNC80 (20 mg/kg, i.p.) was systemically administered at indicated  
23 timepoints. In comparison to WT mice (Fig. 2e-i), genetic knockout of  $\beta$ -arrestin 1 prevented

1 SNC80-mediated ERK1/2 phosphorylation in the dorsal striatum and nucleus accumbens (**Fig. 6f-**  
2 **g**; see **Table S5** for one-way ANOVA and post-hoc multiple comparison). In the amygdala and  
3 dorsal hippocampus of  $\beta$ -arrestin 1 KO mice, SNC80 did increase ERK1/2 phosphorylation (**Fig.**  
4 **6h-i**), but in contrast to the response observed in WT mice, the activation was sustained for at least  
5 30 minutes. Additionally, we observed ERK1/2 activation in the ventral hippocampus (**Fig. 6j**), a  
6 region where we had observed no  $\delta$ OR agonist-mediated modulation of ERK1/2 in WT mice (**Fig.**  
7 **2i** and **Fig. 6e**), suggesting this pattern of ERK1/2 activity may not be  $\delta$ OR-mediated and is most  
8 likely a result of seizure activity.

9

10

## Discussion

11 Here, we investigated the hypothesis that  $\beta$ -arrestin can modulate anxiety- and conditioned fear-  
12 related behavior through downstream MAPK activation. By utilizing G protein- and  $\beta$ -arrestin-  
13 biased  $\delta$ OR agonists together with  $\beta$ -arrestin-isoform selective knockout mice, we discovered that  
14 G protein,  $\beta$ -arrestin 1, and  $\beta$ -arrestin 2 uniquely modulated ERK1/2 activity resulting in  
15 differential outcomes in mouse models of anxiety/fear-related behavior. Our results suggest that  
16 the reduction in anxiety-like behavior by SNC80 required the presence of  $\beta$ -arrestin 2 as well as  
17 activation of ERK1/2. Distinctly in the dorsal hippocampus, we found that ERK1/2 activation was  
18  $\beta$ -arrestin 2-dependent (**Fig. 7a**). We also found that SNC80-induced ERK1/2 activation in the  
19 nucleus accumbens and the dorsal striatum required  $\beta$ -arrestin 1, which may be part of the  
20 mechanism by which SNC80 decreased FPS (**Fig. 7b**) as well as increase general locomotion (**Fig.**  
21 **S1**). Notably, G protein-biased signaling by TAN67 reduced ERK1/2 phosphorylation and was  
22 correlated with increased FPS (**Fig. 7c**).

1           *Differential roles for  $\beta$ -arrestin isoforms in neuropsychiatric behavior.* The  $\beta$ -arrestin  
2 proteins were discovered in quick succession (40, 41), surprisingly, despite the availability of  
3 genetic KO mice for each isoform (42, 43). Studies investigating  $\beta$ -arrestin in the CNS have largely  
4 focused on  $\beta$ -arrestin 2 and have generally neglected  $\beta$ -arrestin 1 (44, 45). A potential reason for  
5 the preference of studying  $\beta$ -arrestin 2 may be that when the  $\beta$ -arrestin 2 knockout mice were  
6 generated their first utilization was to highlight the proteins' involvement with the CNS-mediated  
7 adverse effects of  $\mu$ -opioid receptor agonism (46, 47). Researchers have only recently begun to  
8 utilize  $\beta$ -arrestin 1 KO mice to study various neurological disorders. In 2016, Pradhan *et al.* found  
9 that different  $\delta$ OR agonists either preferentially recruited  $\beta$ -arrestin 1 leading to  $\delta$ OR degradation  
10 or recruited  $\beta$ -arrestin 2 causing  $\delta$ OR resensitization (15). A study in 2017 found that  
11 amphetamine-induced hyperlocomotion was amplified in  $\beta$ -arrestin 1 KO mice, but attenuated in  
12  $\beta$ -arrestin 2 KO mice (48), further emphasizing the importance of studying both  $\beta$ -arrestin isoforms.

13           While our study identified that SNC80-induced anxiolytic-like effects were  $\beta$ -arrestin 2-  
14 dependent,  $\beta$ -arrestin 2 KO mice still exhibited the fear-reducing effect of SNC80, which could  
15 suggest a potential role for  $\beta$ -arrestin 1 in the modulation of fear-related behavior. Particularly, we  
16 noted that  $\beta$ -arrestin 1 KO abolished SNC80-induced ERK1/2 activation in the striatum and  
17 nucleus accumbens. Our findings were in line with the extensive *in-situ* hybridization studies on  
18 differential  $\beta$ -arrestin isoform levels in neonatal and postnatal rats (49, 50) and studies showing  
19 relatively high  $\beta$ -arrestin 1 and low  $\beta$ -arrestin 2 expressions in the striatal regions (41, 49, 51). In  
20 contrast, SNC80-induced ERK1/2 activation in the dorsal hippocampus and amygdala was  $\beta$ -  
21 arrestin 2-dependent, which agreed with reports of stronger expression of this isoform in those  
22 areas (41, 51). Unfortunately, we were limited in our ability to assess whether SNC80-induced  
23 reduction in FPS would be attenuated in  $\beta$ -arrestin 1 KO mice, as SNC80 produces severe seizures

1 in these mice (16), a phenomenon we have also observed ourselves and found to be accompanied  
2 by strong and persistent ERK1/2 activation in the dorsal hippocampus. Further investigation of the  
3 roles of  $\beta$ -arrestin 1 in neuropsychiatric behavior may be feasible using a conditional knockout  
4 approach; currently conditional  $\beta$ -arrestin 2 knockout mice already exist (52), but conditional  $\beta$ -  
5 arrestin 1 knockout mice have not yet been reported.

6 *A unique role for  $G_i$  protein signaling and ERK1/2 signaling in conditioned fear-related*  
7 *behavior.* In contrast to the  $\beta$ -arrestin-mediated activation of ERK1/2, we found that selective G  
8 protein signaling at the  $\delta$ OR by TAN67 decreased ERK1/2 activation (Fig. 6a-d) and was  
9 associated with increased FPS (Fig. 5j). TAN67 is a known weak recruiter of  $\beta$ -arrestin 1 and 2  
10 (14) (Fig. S7). This result is in agreement with the observation and that blocking  $G_{i/o}$  protein  
11 signaling using pertussis toxin in the basolateral amygdala reduced FPS (53) and parallels finding  
12 that TAN67 did not reduce unconditioned anxiety-like behavior in naïve mice (20). Additionally,  
13 a study in ovariectomized mice found that estradiol benzoate, an anxiogenic estradiol prodrug (54),  
14 decreased ERK in the hippocampus (55), which supports our finding that decreased ERK1/2 is  
15 correlated with increased fear. It is noteworthy that both  $G_i$  protein and  $\beta$ -arrestin can activate  
16 ERK1/2 albeit through different mechanisms (56, 57). One explanation for our observation is that  
17 TAN67 competes with the endogenous  $\delta$ OR agonist Leu-enkephalin, which is a much more  
18 efficacious recruiter of  $\beta$ -arrestin (14) (Fig. S8). Based on observations of enhanced anxiety-like  
19 behavior in preproenkephalin KO mice, Leu-enkephalin has anxiolytic-like effects by itself (58,  
20 59), which is in line with reports that the  $\delta$ OR antagonist, naltrindole, is anxiogenic (60). As a  
21 weak  $\beta$ -arrestin recruiter, TAN67 would attenuate any baseline Leu-enkephalin-induced  $\beta$ -  
22 arrestin-mediated ERK activity (Fig. S8). Because ADL5859 has a low potency for  $\beta$ -arrestin 2  
23 recruitment, the same pharmacological principle described above holds true, with the exception

1 that at supersaturating doses, ADL5859 will begin to efficaciously recruit  $\beta$ -arrestin 2, whereas  
2 TAN-67 will not. In contrast, because SNC80 is a stronger  $\beta$ -arrestin recruiter than Leu-enkephalin,  
3 it will elevate basal ERK1/2 activity produced by endogenous opioids. This hypothesis would also  
4 explain why SNC80-induced ERK1/2 activation is quite variable and produces on average only a  
5 two-fold increase in pERK1/2 levels.

6  *$\beta$ -arrestin serves as a scaffold for a range of kinases and effectors.* In our study, we found  
7 that  $\delta$ OR agonism strongly activates ERK1/2 compared to p38 and JNK, and that the ERK1/2  
8 activity induced by SNC80 was negatively correlated with FPS. Other GPCRs, besides the  $\delta$ OR,  
9 may also require  $\beta$ -arrestin-dependent ERK1/2 signaling for modulation of fear. For example, in  
10 the infralimbic prefrontal cortex,  $\beta$ -adrenergic receptor activation can promote the extinction of  
11 contextual fear memory (61). In a recent study, it was shown that in this same brain region  $\beta$ -  
12 arrestin 2-dependent ERK1/2 activation was required for  $\beta$ -adrenergic receptors agonists to  
13 stimulate extinction learning of cocaine-induced reward memories (52).  $\beta$ -arrestin 2-mediated  
14 signaling in the CNS is not exclusive to ERK1/2 signaling; following  $\kappa$ OR activation,  $\beta$ -arrestin 2  
15 can scaffold with p38 as part of a potential mechanism for the aversive effects of  $\kappa$ OR agonists  
16 (62). A  $\beta$ -arrestin 2 scaffold of AKT, GSK3 $\beta$  and PP2A has been proposed as a mechanism for  
17 stabilizing mood (63), highlighting that  $\beta$ -arrestin signaling is also not limited to MAPKs. In fact,  
18 because  $\beta$ -arrestin 1, in contrast to  $\beta$ -arrestin 2, contains a nuclear translocation sequence (64), it  
19 can translocate to the nucleus and regulate gene transcription (65, 66). While in this study we  
20 report  $\delta$ ORs require  $\beta$ -arrestin-dependent ERK signaling for reduction in anxiety-like behavior, it  
21 is certainly possible that other GPCRs may engage different intracellular signaling pathways  
22 following  $\beta$ -arrestin recruitment.

1           *Fear- and anxiety-like behaviors rely on shared but distinct neural circuits.* In our study,  
2 we observed that  $\beta$ -arrestin 2-dependent ERK1/2 activity in the dorsal hippocampus was  
3 associated with reduced anxiety-like behavior. Generally, CA1 regions of the ventral hippocampus  
4 are associated with responding to contextually-conditioned anxiogenic stimuli than dorsal CA1  
5 regions (67, 68), whereas the dorsal hippocampus is involved with cognitive functions, including  
6 exploration, navigation and memory (69). Still, our finding that  $\delta$ OR signaling in the dorsal  
7 hippocampus is connected to the anxiolytic-like effects of SNC80, agrees with a study showing  
8 that intra-dorsal CA1 injection of the  $\delta$ OR antagonist naltrindole is anxiogenic (35). Additionally,  
9 the anxiolytic-like effects of SNC80 may also involve  $\beta$ -arrestin 2-dependent ERK1/2 signaling in  
10 the amygdala, a region more commonly associated with innate anxiety-like behavior (70, 71). The  
11 basolateral amygdala (BLA) also plays an important role in fear conditioning (72), including FPS  
12 (73). The BLA receives dopaminergic inputs from the ventral tegmental area and projects to the  
13 nucleus accumbens. It has been proposed that dopaminergic signaling in the BLA is important for  
14 cue-dependent fear-conditioning, such as FPS (74) and that the BLA to nucleus accumbens  
15 projection is critical for consolidation of memories associated with aversive effects such as foot  
16 shock (75, 76). Future studies using conditional  $\beta$ -arrestin and/or  $\delta$ OR KO mice could help assess  
17 to what degree dopamine receptor-mediated  $\beta$ -arrestin signaling is required for the observed  
18 behaviors.

19           Our finding that ERK1/2 activation in the striatal regions was ablated in  $\beta$ -arrestin 1 KO  
20 mice may suggest that striatal  $\beta$ -arrestin 1-mediated ERK1/2 signaling is critical for the modulation  
21 of the expression of conditioned fear-related behavior. Processing and executing emotional  
22 behaviors in tasks such as the elevated plus maze and FPS tests engages multiple overlapping, yet  
23 distinct, brain regions and circuits involved in memory retrieval, locomotion, decision making,



1 reward, and mood (72). Further studies with circuit-based approaches are necessary to assess the  
2 role of biased signaling pathways in the acquisition and expression of conditioned fear-related  
3 behavior.

4 *Beneficial roles of  $\beta$ -arrestin signaling.* For the longest time,  $\beta$ -arrestin 2 has been  
5 associated solely with adverse effects of opioid activation, including tolerance, constipation,  
6 respiratory depression, aversion and alcohol use (20, 46, 77). These studies fueled a drive to  
7 develop G protein-biased opioids to treat pain and other disorders with an improved therapeutic  
8 window (78, 79). Yet, recently a number of studies have started to push back against this narrative  
9 (80-84). Clearly,  $\beta$ -arrestin signaling is not inherently negative as the therapeutic effects of lithium  
10 and fluoxetine and D<sub>2</sub>R agonists seem to depend on  $\beta$ -arrestin 2 (85-87). The increased propensity  
11 for  $\beta$ -arrestin 1 KO mice to experience SNC80-induced seizure points to a potential beneficial role  
12 for this isoform in maintaining seizure threshold, which could be of use in the treatment of epilepsy.  
13 In this study, we provide additional insights regarding potential therapeutic benefits of  $\beta$ -arrestin  
14 signaling in reducing anxiety-like behavior. Providing adequate relief of chronic pain is not trivial,  
15 partly because it is often associated with negative affect (88, 89) including anxiety, which may  
16 exacerbate pain (90).  $\delta$ OR agonists have been proposed as potential treatment for chronic pain  
17 disorders (91), partly because they have the ability to not only provide analgesia, but also treat  
18 comorbid anxiety and depression (17, 20, 92). However, our results would argue that developing  
19 G protein-biased  $\delta$ OR agonists may produce drugs that are suboptimal for the treatment of complex  
20 chronic pain; our findings suggest such a drug would not alleviate co-morbid fear and anxiety, but  
21 potentially even worsen these symptoms. Thus, our study results argue in favor of a reassessment  
22 of drug development efforts that seek solely to identify G protein-biased drugs. Instead, we  
23 propose that efforts should be directed towards the development of drugs with finely tuned bias



1 and, if possible, towards development of molecules that are biased against a single  $\beta$ -arrestin  
2 isoform rather than both isoforms and are circuit-specific.

3 *Conclusion.* Overall, our results begin to reveal the complex- and context-specific nature  
4 of GPCR biased signaling in modulation of fear-related and anxiety-like behavior. These results  
5 expand our current understanding of therapeutic effects of  $\beta$ -arrestin signaling in mood disorders,  
6 which ultimately may aid development of more efficacious pharmacological treatment options for  
7 these disorders.

## 1 **Materials and Methods**

2 **Animals** Wild-type (WT) C57BL/6 male mice were purchased from Envigo (Indianapolis, IN),  
3 and  $\beta$ -arrestin 1 or 2 global knockout (KO) mice as well as  $\delta$ OR KO mice were bred in our facility  
4 (14, 93, 94). The knockout mice have been rederived every three years by crossing the KO mice  
5 with WT C57BL/6 mice from Envigo to reduce genetic drift. Adult mice (8-10 weeks,  $25 \pm 3$ g)  
6 were group housed (3-5 mice) in a single ventilated Plexiglas cage. Mice were maintained at  
7 ambient temperature (21°C) in an animal housing facility approved by the Association for  
8 Assessment and Accreditation of Laboratory Animal Care and animals were kept on a reversed  
9 12-hour dark-light cycle (lights off at 10:00, lights on at 22:00). Food and water were provided ad  
10 libitum. Purchased mice were acclimated for one week prior to the experiments. All animal  
11 protocols (#1305000864 by RMvR) were preapproved by Purdue Animal Care and Use Committee  
12 and were in accordance with the National Institutes of Health's Guide for the Care and Use of  
13 Laboratory Animals.

14 **Drug preparation and administration** SNC80 (#076410, Tocris, Thermo Fisher Scientific,  
15 Waltham, MA) was diluted in slightly acidic saline pH5-6. TAN67 (#092110, Tocris, Thermo  
16 Fisher Scientific) was diluted in sterile saline. SL327 (#19691, Tocris, Thermo Fisher Scientific)  
17 was diluted in 5% DMSO, 10% Cremophore (Millipore Sigma, Burlington, MA) and 85% saline.  
18 ADL5859 (#1751, Axon Medchem, Reston, VA) was diluted in 0.5 % methylcellulose and 0.1 %  
19 tween 80 as indicated in (37). To investigate our hypotheses, we utilized several  $\delta$ OR agonists:  
20 SNC80, TAN67, and ADL5859. Doses for each drug were based on those that proved to impact  
21 behavior through  $\delta$ OR (14, 20, 37). For SNC80, we used a dose of 20 mg/kg (14, 20). We have  
22 also tested 10 mg/kg SNC80 (i.p.). While this dose was effective in other studies effect (17, 95),  
23 in our hands, we did not observe any significant effects (Fig. S6). TAN67 was tested at a dose of

1 25 mg/kg (14, 20), whereas ADL5859 was administered at a dose of 30 mg/kg (37). We also used  
2 the MEK inhibitor SL327 at a 50mg/kg dose to prevent ERK phosphorylation, as this inhibitor has  
3 been reported to cross the blood-brain barrier (96, 97). Except for ADL5859, which was  
4 administered with per oral (p.o.), all drugs were administered either intraperitoneal (i.p.) or  
5 subcutaneous (s.c.), and specific times prior to behavior or brain tissue extraction can be found in  
6 figure legends. Additionally, separate batches of mice with no prior history of drug injection were  
7 used for the brain collection and behavioral tests to test earlier time-points of ERK1/2 signaling  
8 (such as 10 minutes).

9 **Elevated-plus maze test** The elevated-plus maze test was performed as previously described (20).  
10 Mice were allowed to explore the maze for 5 minutes, and arm entries and time spent in each arm  
11 were recorded with a camera positioned above the maze.

12 **Dark–light transition box test** The test was performed based on previously established protocols  
13 (20, 93) Testing was conducted without a habituation session to the boxes and a 1/2 area dark  
14 insert was placed in the locomotor boxes, leaving the remaining 1/2 of the area lit as described  
15 previously (98). Two LED lights were inserted above the light portion of the testing chamber where  
16 the lux of the light region ranged from 390-540 lumens and dark chamber lux ranged from 0-12  
17 lumens. For testing, animals were placed in the light portion of the chamber and testing began  
18 upon animal entry. Time spent in the dark and light chambers as well as their locomotor activity  
19 was recorded for 5 minutes with a photobeam-based tracking system.

20 **Fear potentiated startle (FPS) test** Startle reflexes of mice were recorded in the startle reflex  
21 chambers (25.8 x 25 x 26.5 cm) using the Hamilton Kinder Startle Monitor system (Kinder  
22 Scientific, Poway, CA). On the conditioning day, all subjects were conditioned with 40  
23 conditioning trials by a fixed 2 minute inter-trial interval (ITI), and FPS responses were tested on

1 the following day. The fear conditioning and FPS parameters were based on a previously  
2 established protocol (99).

3 **Preparation of tissue homogenates** After drug injections, mice were euthanized by carbon  
4 dioxide asphyxiation and rapidly decapitated. Based on our previous studies, we have particularly  
5 chosen carbon dioxide asphyxiation over other euthanasia methods that may potentially increase  
6 basal ERK1/2 activity in the brain (100). The collected brains were first sliced as coronal sections  
7 (1.5-2.0 mm) with a brain matrix (#RBMS-205C, Kent scientific, Torrington, CT), and then flash-  
8 frozen in dry-ice-chilled 2-methylbutane (-40 °C) (#03551-4, Fisher Scientific). Regions of  
9 interest were collected from these slices using a 1 mm biopsy micropunch (#15110-10, Miltex,  
10 Plainsboro, NJ) as follows: dorsal striatum and nucleus accumbens (A/P: +0.5 mm to +1.5 mm),  
11 dorsal hippocampus and amygdala (A/P: -1 mm to -2 mm), and ventral hippocampus (A/P: -2 mm  
12 to -4 mm) (101). The punches targeted a specific region and produced enough tissue to run several  
13 blots. However, it is noteworthy that the extracted tissue may contain small amounts of tissue from  
14 neighboring regions. For example, while the punches for the amygdala primarily consisted of the  
15 BLA, the tissue will also have included a small portion of the central amygdala. Collected tissues  
16 were further homogenized with a tissue grinder (#357535 & 357537, DWK Life Sciences,  
17 Millville, NJ) in RIPA buffer mixed Halt™ Protease and Phosphatase Inhibitor Cocktail  
18 (#1861280, Thermo Fisher Scientific). Samples were further prepared based on previously  
19 established protocols (100). Data depicted in Fig. 2e-i also includes the data collected for SNC80  
20 at the 0 min or 10 min time points in the experiment depicted in Fig. 4c,d to represent the full  
21 range of observed SNC80 induced ERK1/2 activation in mice tested in separate cohorts at different  
22 occasions.

1 **Cell culture** Chinese hamster ovarian CHO- $\delta$ OR- $\beta$ Arr2 cells (DiscoverX, Fremont, CA) U2OS-  
2  $\delta$ OR- $\beta$ Arr1 (DiscoverX), and NG-108-15 cells (HB-12317<sup>TM</sup>, ATCC®, Manassas, VA) were  
3 cultured as recommended by the manufacturer and maintained at 37° C/5 % CO<sub>2</sub>. Cells were  
4 seeded in a clear 6 well plate (Corning<sup>TM</sup>, Thermo Fisher Scientific) with 250,000 cells/2 mL/well.  
5 On the following day, all growth media was aspirated and changed into 1 mL serum-free Opti-  
6 MEM (#31985070, Gibco®, Thermo Fisher Scientific). The next day, cells were challenged with  
7 10  $\mu$ M drugs (SNC80) for a specific duration (0, 3, 6, 20, and 60 minutes). All drugs were diluted  
8 in Opti-MEM prior to administration. The media was aspirated following the challenge and 100  
9  $\mu$ L RIPA buffer was added to collect the samples on ice. Using cell scrapers (#353089, Thermo  
10 Fisher Scientific), all samples were dislodged from the 6-well plate, collected and stored at -30° C  
11 until usage. For the Western blot, the collected samples were quantified with the Bradford assay  
12 and samples were prepared with 4 x Laemmli and boiled at 95° C for 5 minutes. The CHO- $\delta$ OR-  
13  $\beta$ Arr2 cells were also used to measure  $\beta$ -arrestin recruitment using the DiscoverX PathHunter  
14 Assay as previously described (14).

15 **SDS-Page and Western blot** Samples (20  $\mu$ L containing 10  $\mu$ g protein) were loaded per well of  
16 a NuPage 4-12 % Bis-Tris gradient gels (#NP0336BOX, Thermo Fisher Scientific), and the SDS-  
17 Page gel was subsequently transferred to nitrocellulose membranes (#1620115, BioRad) by the  
18 Western blot. Membranes were incubated following previously established protocols (100). For  
19 reproducibility, detailed information regarding the antibodies used in the study are listed in **Table**  
20 **S6**. Prepared samples were scanned using the LiCor Odyssey® CLx Scanner (Li-Cor, Lincoln,  
21 NE). By utilizing the Li-Cor secondary antibodies, we were able to detect the MAPK, pMAPK,  
22 and  $\alpha$ -Tubulin on the same blot without the need of stripping/reblotting. In the same membrane,  
23 each band was cut based on their size. For instance, ERK1/2 and pERK1/2 bands were collected

1 around 42/44 kDa and  $\alpha$ -Tubulin band was collected around 50 kDa in the same membrane. For  
2 statistical analysis, we normalized the pMAPK/MAPK ratio to  $\alpha$ -Tubulin in case drug treatment  
3 changed ERK1/2 levels.

4 **Preparation of tissue for immunofluorescence** To preserve the intact ERK1/2 activity in vivo  
5 for fluorescence microscopy, mice were transcardially perfused before isolation of brain tissue.  
6 Thirty minutes prior to transcardiac perfusion, mice were administered with 100/10 mg/kg  
7 Ketamine/Xylazine. Ten minutes prior to perfusion, 20 mg/kg SNC80 (i.p.) or a corresponding  
8 volume of saline was administered to the mice. Mice were then perfused with 30 mL of cold PBS  
9 and 4% paraformaldehyde (#100503-916, VWR, Radnor, PA) and were immediately decapitated  
10 to collect the brains. The brains were fixated in 4% paraformaldehyde overnight, dehydrated in  
11 30% sucrose, and then embedded in Frozen Section Compound (#3801480, Leica, Wetzlar,  
12 Germany). Frozen brains were sliced at a width of 30  $\mu$ m using the Leica cryostat and  
13 permeabilized in 100% methanol at - 20 °C for 10 minutes. The slices were blocked in 5 % Normal  
14 goat serum (#S26-100ml, Millipore Sigma) for an hour then stained with primary antibodies as  
15 listed in **Table S6**. For immunofluorescence labeling, the sections were incubated in the secondary  
16 antibodies according to the previously established protocol (*I02*) and as listed in **Table S6**. After  
17 the final washing, the nuclei of the sections were stained and the slices were mounted on a glass  
18 slide with Vectashield® (#H-1200, Vector lab, Burlingame, CA). Images were acquired with a  
19 Nikon confocal microscope and assembled in Adobe Photoshop CS6 (Adobe).

20 **Statistical analysis** The maximum amplitude of the startle response was measured from the  
21 average of all responses for each trial type (12 noise-alone, 12 light+noise) of each mouse. Fear-  
22 potentiated startle response was analyzed using raw (maximum) startle amplitudes and  
23 proportional changes of each trial type (noise-alone, light+noise), which is shown as % FPS in the

1 graphs. The proportional change score (% FPS) was calculated as follows: (startle response to light  
2 and noise – startle response to noise)/startle response to noise x 100. Thus, %FPS is a sensitive  
3 measure that adjusts for individual and group differences (for example, possible non-specific  
4 effects of drug treatment) in startle response magnitude that may be observed on noise-alone and  
5 light + noise trials (103).

6 All data are presented as individual data points (or means)  $\pm$  standard error of the mean  
7 (S.E.M.). Assays with one independent variable were analyzed for statistical significance using a  
8 one-way Analysis of Variance (ANOVA), whereas assays with two independent variables were  
9 analyzed using a two-way ANOVA. If a significant deviation of the mean was identified, an  
10 appropriate post-hoc analysis was performed as indicated in the supplemental table or the  
11 corresponding figure legends. Gaussian distribution of our datasets was assessed using the  
12 D’augostino and Pearson analysis. We excluded one outlier in our wild-type cohort that received  
13 SNC80 and one that received TAN67 in the FPS assay based on the Grubbs’ test ( $\alpha = 0.05$ ). In the  
14 dark-light and elevated plus maze tests we excluded subjects that were frozen/stationary for >95%  
15 of the experimental time. All statistical analysis was conducted using GraphPad Prism 7  
16 (GraphPad Software, La Jolla, CA).

17

1

## References

- 2 1. P. Tovote, J. P. Fadok, A. Luthi, Neuronal circuits for fear and anxiety. *Nat Rev Neurosci*  
3 **16**, 317-331 (2015).
- 4 2. E. Akimova, R. Lanzenberger, S. Kasper, The serotonin-1A receptor in anxiety disorders.  
5 *Biol Psychiatry* **66**, 627-635 (2009).
- 6 3. M. P. de la Mora, A. Gallegos-Cari, Y. Arizmendi-Garcia, D. Marcellino, K. Fuxe, Role  
7 of dopamine receptor mechanisms in the amygdaloid modulation of fear and anxiety:  
8 Structural and functional analysis. *Prog Neurobiol* **90**, 198-216 (2010).
- 9 4. M. Kindt, M. Soeter, B. Vervliet, Beyond extinction: erasing human fear responses and  
10 preventing the return of fear. *Nat Neurosci* **12**, 256-258 (2009).
- 11 5. B. B. Land *et al.*, Activation of the kappa opioid receptor in the dorsal raphe nucleus  
12 mediates the aversive effects of stress and reinstates drug seeking. *Proc Natl Acad Sci U S*  
13 *A* **106**, 19168-19173 (2009).
- 14 6. L. K. Takahashi, Role of CRF(1) and CRF(2) receptors in fear and anxiety. *Neurosci*  
15 *Biobehav Rev* **25**, 627-636 (2001).
- 16 7. K. L. Pierce, R. T. Premont, R. J. Lefkowitz, Seven-transmembrane receptors. *Nat Rev Mol*  
17 *Cell Biol* **3**, 639-650 (2002).
- 18 8. Y. K. Hahn *et al.*, Central HIV-1 Tat exposure elevates anxiety and fear conditioned  
19 responses of male mice concurrent with altered mu-opioid receptor-mediated G-protein  
20 activation and beta-arrestin 2 activity in the forebrain. *Neurobiol Dis* **92**, 124-136 (2016).
- 21 9. M. R. Bruchas, T. A. Macey, J. D. Lowe, C. Chavkin, Kappa opioid receptor activation of  
22 p38 MAPK is GRK3- and arrestin-dependent in neurons and astrocytes. *J Biol Chem* **281**,  
23 18081-18089 (2006).
- 24 10. J. M. Beaulieu *et al.*, An Akt/beta-arrestin 2/PP2A signaling complex mediates  
25 dopaminergic neurotransmission and behavior. *Cell* **122**, 261-273 (2005).
- 26 11. J. A. Allen *et al.*, Discovery of beta-arrestin-biased dopamine D2 ligands for probing signal  
27 transduction pathways essential for antipsychotic efficacy. *Proc Natl Acad Sci U S A* **108**,  
28 18488-18493 (2011).
- 29 12. J. W. Wisler, K. Xiao, A. R. Thomsen, R. J. Lefkowitz, Recent developments in biased  
30 agonism. *Curr Opin Cell Biol* **27**, 18-24 (2014).



- 1 13. N. M. Urs, S. M. Peterson, M. G. Caron, New Concepts in Dopamine D2 Receptor Biased  
2 Signaling and Implications for Schizophrenia Therapy. *Biol Psychiatry* **81**, 78-85 (2017).
- 3 14. T. Chiang, K. Sansuk, R. M. van Rijn, beta-Arrestin 2 dependence of delta opioid receptor  
4 agonists is correlated with alcohol intake. *Br J Pharmacol* **173**, 332-343 (2016).
- 5 15. A. A. Pradhan *et al.*, Agonist-Specific Recruitment of Arrestin Isoforms Differentially  
6 Modify Delta Opioid Receptor Function. *J Neurosci* **36**, 3541-3551 (2016).
- 7 16. A. Vicente-Sanchez *et al.*, Tolerance to high-internalizing delta opioid receptor agonist is  
8 critically mediated by arrestin 2. *Br J Pharmacol* **175**, 3050-3059 (2018).
- 9 17. A. Saitoh *et al.*, Potential anxiolytic and antidepressant-like activities of SNC80, a selective  
10 delta-opioid agonist, in behavioral models in rodents. *J Pharmacol Sci* **95**, 374-380 (2004).
- 11 18. A. Saitoh *et al.*, The delta opioid receptor agonist KNT-127 in the prelimbic medial  
12 prefrontal cortex attenuates veratrine-induced anxiety-like behaviors in mice. *Behav Brain*  
13 *Res* **336**, 77-84 (2018).
- 14 19. Y. Li *et al.*, Regulation of amygdalar PKA by beta-arrestin-2/phosphodiesterase-4 complex  
15 is critical for fear conditioning. *Proc Natl Acad Sci U S A* **106**, 21918-21923 (2009).
- 16 20. R. M. van Rijn, D. I. Brissett, J. L. Whistler, Dual efficacy of delta opioid receptor-selective  
17 ligands for ethanol drinking and anxiety. *J Pharmacol Exp Ther* **335**, 133-139 (2010).
- 18 21. R. J. Lefkowitz, S. K. Shenoy, Transduction of receptor signals by beta-arrestins. *Science*  
19 **308**, 512-517 (2005).
- 20 22. J. T. Coyle, R. S. Duman, Finding the intracellular signaling pathways affected by mood  
21 disorder treatments. *Neuron* **38**, 157-160 (2003).
- 22 23. C. M. Atkins, J. C. Selcher, J. J. Petraitis, J. M. Trzaskos, J. D. Sweatt, The MAPK cascade  
23 is required for mammalian associative learning. *Nat Neurosci* **1**, 602-609 (1998).
- 24 24. C. Herry, P. Trifilieff, J. Micheau, A. Luthi, N. Mons, Extinction of auditory fear  
25 conditioning requires MAPK/ERK activation in the basolateral amygdala. *Eur J Neurosci*  
26 **24**, 261-269 (2006).
- 27 25. E. M. Richards *et al.*, A randomized, placebo-controlled pilot trial of the delta opioid  
28 receptor agonist AZD2327 in anxious depression. *Psychopharmacology (Berl)* **233**, 1119-  
29 1130 (2016).

- 1 26. M. T. Robins, T. Chiang, K. L. Mores, D. Alongkronrusmee, R. M. van Rijn, Critical Role  
2 for Gi/o-Protein Activity in the Dorsal Striatum in the Reduction of Voluntary Alcohol  
3 Intake in C57Bl/6 Mice. *Front Psychiatry* **9**, 112 (2018).
- 4 27. R. Rozenfeld, L. A. Devi, Receptor heterodimerization leads to a switch in signaling: beta-  
5 arrestin2-mediated ERK activation by mu-delta opioid receptor heterodimers. *FASEB J* **21**,  
6 2455-2465 (2007).
- 7 28. B. Cen *et al.*, Direct binding of beta-arrestins to two distinct intracellular domains of the  
8 delta opioid receptor. *J Neurochem* **76**, 1887-1894 (2001).
- 9 29. W. A. Klee *et al.*, Identification of a Mr 58 000 glycoprotein subunit of the opiate receptor.  
10 *FEBS Lett* **150**, 125-128 (1982).
- 11 30. D. A. Eisinger, H. Ammer, R. Schulz, Chronic morphine treatment inhibits opioid receptor  
12 desensitization and internalization. *J Neurosci* **22**, 10192-10200 (2002).
- 13 31. E. Erbs *et al.*, A mu-delta opioid receptor brain atlas reveals neuronal co-occurrence in  
14 subcortical networks. *Brain Struct Funct* **220**, 677-702 (2015).
- 15 32. P. Chu Sin Chung *et al.*, A novel anxiogenic role for the delta opioid receptor expressed in  
16 GABAergic forebrain neurons. *Biol Psychiatry* **77**, 404-415 (2015).
- 17 33. A. Tohgo, K. L. Pierce, E. W. Choy, R. J. Lefkowitz, L. M. Luttrell, beta-Arrestin  
18 scaffolding of the ERK cascade enhances cytosolic ERK activity but inhibits ERK-  
19 mediated transcription following angiotensin AT1a receptor stimulation. *J Biol Chem* **277**,  
20 9429-9436 (2002).
- 21 34. S. E. File, P. J. Kenny, S. Cheeta, The role of the dorsal hippocampal serotonergic and  
22 cholinergic systems in the modulation of anxiety. *Pharmacol Biochem Behav* **66**, 65-72  
23 (2000).
- 24 35. J. Solati, M. R. Zarrindast, A. A. Salari, Dorsal hippocampal opioidergic system modulates  
25 anxiety-like behaviors in adult male Wistar rats. *Psychiatry Clin Neurosci* **64**, 634-641  
26 (2010).
- 27 36. B. Le Bourdonnec *et al.*, Potent, orally bioavailable delta opioid receptor agonists for the  
28 treatment of pain: discovery of N,N-diethyl-4-(5-hydroxyspiro[chromene-2,4'-piperidine]-  
29 4-yl)benzamide (ADL5859). *J Med Chem* **51**, 5893-5896 (2008).

- 1 37. C. Nozaki *et al.*, delta-Opioid mechanisms for ADL5747 and ADL5859 effects in mice:  
2 analgesia, locomotion, and receptor internalization. *J Pharmacol Exp Ther* **342**, 799-807  
3 (2012).
- 4 38. A. Sugiyama *et al.*, Systemic administration of a delta opioid receptor agonist, KNT-127,  
5 facilitates extinction learning of fear memory in rats. *J Pharmacol Sci* **139**, 174-179 (2019).
- 6 39. A. Mansour, H. Khachaturian, M. E. Lewis, H. Akil, S. J. Watson, Autoradiographic  
7 differentiation of mu, delta, and kappa opioid receptors in the rat forebrain and midbrain.  
8 *J Neurosci* **7**, 2445-2464 (1987).
- 9 40. M. J. Lohse, J. L. Benovic, J. Codina, M. G. Caron, R. J. Lefkowitz, beta-Arrestin: a protein  
10 that regulates beta-adrenergic receptor function. *Science* **248**, 1547-1550 (1990).
- 11 41. H. Attramadal *et al.*, Beta-arrestin2, a novel member of the arrestin/beta-arrestin gene  
12 family. *J Biol Chem* **267**, 17882-17890 (1992).
- 13 42. L. M. Bohn *et al.*, Enhanced morphine analgesia in mice lacking beta-arrestin 2. *Science*  
14 **286**, 2495-2498 (1999).
- 15 43. D. A. Conner *et al.*, beta-Arrestin1 knockout mice appear normal but demonstrate altered  
16 cardiac responses to beta-adrenergic stimulation. *Circ Res* **81**, 1021-1026 (1997).
- 17 44. C. Latapy, J. M. Beaulieu, beta-Arrestins in the central nervous system. *Prog Mol Biol*  
18 *Transl Sci* **118**, 267-295 (2013).
- 19 45. E. J. Whalen, S. Rajagopal, R. J. Lefkowitz, Therapeutic potential of beta-arrestin- and G  
20 protein-biased agonists. *Trends Mol Med* **17**, 126-139 (2011).
- 21 46. K. M. Raehal, J. K. Walker, L. M. Bohn, Morphine side effects in beta-arrestin 2 knockout  
22 mice. *J Pharmacol Exp Ther* **314**, 1195-1201 (2005).
- 23 47. L. M. Bohn, R. R. Gainetdinov, F. T. Lin, R. J. Lefkowitz, M. G. Caron, Mu-opioid  
24 receptor desensitization by beta-arrestin-2 determines morphine tolerance but not  
25 dependence. *Nature* **408**, 720-723 (2000).
- 26 48. L. Zurkovsky, K. Sedaghat, M. R. Ahmed, V. V. Gurevich, E. V. Gurevich, Arrestin-2 and  
27 arrestin-3 differentially modulate locomotor responses and sensitization to amphetamine.  
28 *Neuropharmacology* **121**, 20-29 (2017).
- 29 49. E. V. Gurevich, J. L. Benovic, V. V. Gurevich, Arrestin2 and arrestin3 are differentially  
30 expressed in the rat brain during postnatal development. *Neuroscience* **109**, 421-436 (2002).

- 1 50. E. V. Gurevich, J. L. Benovic, V. V. Gurevich, Arrestin2 expression selectively increases  
2 during neural differentiation. *J Neurochem* **91**, 1404-1416 (2004).
- 3 51. K. Bjork *et al.*, Modulation of voluntary ethanol consumption by beta-arrestin 2. *FASEB J*  
4 **22**, 2552-2560 (2008).
- 5 52. B. Huang *et al.*, beta-Arrestin-biased beta-adrenergic signaling promotes extinction  
6 learning of cocaine reward memory. *Sci Signal* **11**, (2018).
- 7 53. K. R. Melia, W. A. Falls, M. Davis, Involvement of pertussis toxin sensitive G-proteins in  
8 conditioned fear-potentiated startle: possible involvement of the amygdala. *Brain Res* **584**,  
9 141-148 (1992).
- 10 54. M. A. Morgan, D. W. Pfaff, Estrogen's effects on activity, anxiety, and fear in two mouse  
11 strains. *Behav Brain Res* **132**, 85-93 (2002).
- 12 55. D. Anchan, S. Clark, K. Pollard, N. Vasudevan, GPR30 activation decreases anxiety in the  
13 open field test but not in the elevated plus maze test in female mice. *Brain Behav* **4**, 51-59  
14 (2014).
- 15 56. Z. G. Goldsmith, D. N. Dhanasekaran, G protein regulation of MAPK networks. *Oncogene*  
16 **26**, 3122-3142 (2007).
- 17 57. J. S. Gutkind, Regulation of mitogen-activated protein kinase signaling networks by G  
18 protein-coupled receptors. *Sci STKE* **2000**, re1 (2000).
- 19 58. A. Ragnauth *et al.*, Female preproenkephalin-knockout mice display altered emotional  
20 responses. *Proc Natl Acad Sci U S A* **98**, 1958-1963 (2001).
- 21 59. J. C. Kung, T. C. Chen, B. C. Shyu, S. Hsiao, A. C. Huang, Anxiety- and depressive-like  
22 responses and c-fos activity in preproenkephalin knockout mice: oversensitivity hypothesis  
23 of enkephalin deficit-induced posttraumatic stress disorder. *J Biomed Sci* **17**, 29 (2010).
- 24 60. M. Narita *et al.*, Chronic pain induces anxiety with concomitant changes in opioidergic  
25 function in the amygdala. *Neuropsychopharmacology* **31**, 739-750 (2006).
- 26 61. F. H. Do-Monte *et al.*, Role of beta-adrenergic receptors in the ventromedial prefrontal  
27 cortex during contextual fear extinction in rats. *Neurobiol Learn Mem* **94**, 318-328 (2010).
- 28 62. M. R. Bruchas *et al.*, Stress-induced p38 mitogen-activated protein kinase activation  
29 mediates kappa-opioid-dependent dysphoria. *J Neurosci* **27**, 11614-11623 (2007).
- 30 63. W. T. O'Brien *et al.*, Glycogen synthase kinase-3 is essential for beta-arrestin-2 complex  
31 formation and lithium-sensitive behaviors in mice. *J Clin Invest* **121**, 3756-3762 (2011).

- 1 64. C. Z. Hoepfner, N. Cheng, R. D. Ye, Identification of a nuclear localization sequence in  
2 beta-arrestin-1 and its functional implications. *J Biol Chem* **287**, 8932-8943 (2012).
- 3 65. J. Kang *et al.*, A nuclear function of beta-arrestin1 in GPCR signaling: regulation of histone  
4 acetylation and gene transcription. *Cell* **123**, 833-847 (2005).
- 5 66. Y. Shi *et al.*, Critical regulation of CD4+ T cell survival and autoimmunity by beta-arrestin  
6 1. *Nat Immunol* **8**, 817-824 (2007).
- 7 67. J. C. Jimenez *et al.*, Anxiety Cells in a Hippocampal-Hypothalamic Circuit. *Neuron* **97**,  
8 670-683 e676 (2018).
- 9 68. M. S. Fanselow, H. W. Dong, Are the dorsal and ventral hippocampus functionally distinct  
10 structures? *Neuron* **65**, 7-19 (2010).
- 11 69. M. A. Kheirbek *et al.*, Differential control of learning and anxiety along the dorsoventral  
12 axis of the dentate gyrus. *Neuron* **77**, 955-968 (2013).
- 13 70. K. M. Tye *et al.*, Amygdala circuitry mediating reversible and bidirectional control of  
14 anxiety. *Nature* **471**, 358-362 (2011).
- 15 71. A. C. Felix-Ortiz *et al.*, BLA to vHPC inputs modulate anxiety-related behaviors. *Neuron*  
16 **79**, 658-664 (2013).
- 17 72. P. H. Janak, K. M. Tye, From circuits to behaviour in the amygdala. *Nature* **517**, 284-292  
18 (2015).
- 19 73. D. Terburg *et al.*, The Basolateral Amygdala Is Essential for Rapid Escape: A Human and  
20 Rodent Study. *Cell* **175**, 723-735 e716 (2018).
- 21 74. J. P. Fadok, T. M. Dickerson, R. D. Palmiter, Dopamine is necessary for cue-dependent  
22 fear conditioning. *J Neurosci* **29**, 11089-11097 (2009).
- 23 75. R. T. LaLumiere, E. M. Nawar, J. L. McGaugh, Modulation of memory consolidation by  
24 the basolateral amygdala or nucleus accumbens shell requires concurrent dopamine  
25 receptor activation in both brain regions. *Learn Mem* **12**, 296-301 (2005).
- 26 76. J. P. Fadok, M. Darvas, T. M. Dickerson, R. D. Palmiter, Long-term memory for pavlovian  
27 fear conditioning requires dopamine in the nucleus accumbens and basolateral amygdala.  
28 *PLoS One* **5**, e12751 (2010).
- 29 77. K. M. Raehal, L. M. Bohn, The role of beta-arrestin2 in the severity of antinociceptive  
30 tolerance and physical dependence induced by different opioid pain therapeutics.  
31 *Neuropharmacology* **60**, 58-65 (2011).

- 1 78. A. Manglik *et al.*, Structure-based discovery of opioid analgesics with reduced side effects.  
2 *Nature* **537**, 185-190 (2016).
- 3 79. K. L. Mores, B. R. Cummins, R. J. Cassell, R. M. van Rijn, A Review of the Therapeutic  
4 Potential of Recently Developed G Protein-Biased Kappa Agonists. *Front Pharmacol* **10**,  
5 407 (2019).
- 6 80. A. Kliewer *et al.*, Phosphorylation-deficient G-protein-biased mu-opioid receptors  
7 improve analgesia and diminish tolerance but worsen opioid side effects. *Nat Commun* **10**,  
8 367 (2019).
- 9 81. R. Hill *et al.*, The novel mu-opioid receptor agonist PZM21 depresses respiration and  
10 induces tolerance to antinociception. *Br J Pharmacol* **175**, 2653-2661 (2018).
- 11 82. C. Austin Zamarripa *et al.*, The G-protein biased mu-opioid agonist, TRV130, produces  
12 reinforcing and antinociceptive effects that are comparable to oxycodone in rats. *Drug*  
13 *Alcohol Depend* **192**, 158-162 (2018).
- 14 83. A. Kliewer *et al.*, Morphine-induced respiratory depression is independent of beta-  
15 arrestin2 signalling. *Br J Pharmacol*, (2020).
- 16 84. A. Gillis *et al.*, Low intrinsic efficacy for G protein activation can explain the improved  
17 side-effect profile of new opioid agonists. *Science Signaling*, (2020).
- 18 85. D. J. David *et al.*, Neurogenesis-dependent and -independent effects of fluoxetine in an  
19 animal model of anxiety/depression. *Neuron* **62**, 479-493 (2009).
- 20 86. N. M. Urs *et al.*, Distinct cortical and striatal actions of a beta-arrestin-biased dopamine  
21 D2 receptor ligand reveal unique antipsychotic-like properties. *Proc Natl Acad Sci U S A*  
22 **113**, E8178-E8186 (2016).
- 23 87. J. M. Beaulieu *et al.*, A beta-arrestin 2 signaling complex mediates lithium action on  
24 behavior. *Cell* **132**, 125-136 (2008).
- 25 88. G. Corder *et al.*, An amygdalar neural ensemble that encodes the unpleasantness of pain.  
26 *Science* **363**, 276-281 (2019).
- 27 89. N. Massaly *et al.*, Pain-Induced Negative Affect Is Mediated via Recruitment of The  
28 Nucleus Accumbens Kappa Opioid System. *Neuron* **102**, 564-573 e566 (2019).
- 29 90. M. al Absi, P. D. Rokke, Can anxiety help us tolerate pain? *Pain* **46**, 43-51 (1991).



- 1 91. A. A. Pradhan, K. Befort, C. Nozaki, C. Gaveriaux-Ruff, B. L. Kieffer, The delta opioid  
2 receptor: an evolving target for the treatment of brain disorders. *Trends Pharmacol Sci* **32**,  
3 581-590 (2011).
- 4 92. S. A. Perrine, B. A. Hoshaw, E. M. Unterwald, Delta opioid receptor ligands modulate  
5 anxiety-like behaviors in the rat. *Br J Pharmacol* **147**, 864-872 (2006).
- 6 93. M. T. Robins *et al.*, Behavioral Characterization of beta-Arrestin 1 Knockout Mice in  
7 Anxiety-Like and Alcohol Behaviors. *Front Behav Neurosci* **12**, 54 (2018).
- 8 94. R. M. van Rijn, J. L. Whistler, The delta(1) opioid receptor is a heterodimer that opposes  
9 the actions of the delta(2) receptor on alcohol intake. *Biol Psychiatry* **66**, 777-784 (2009).
- 10 95. A. Saitoh *et al.*, Antidepressant-like effects of the delta-opioid receptor agonist SNC80  
11 ([(+)-4-[(alphaR)-alpha-[(2S,5R)-2,5-dimethyl-4-(2-propenyl)-1-piperazinyl]-3-me  
12 thoxyphenyl)methyl]-N,N-diethylbenzamide) in an olfactory bulbectomized rat model.  
13 *Brain Res* **1208**, 160-169 (2008).
- 14 96. J. C. Selcher, C. M. Atkins, J. M. Trzaskos, R. Paylor, J. D. Sweatt, A necessity for MAP  
15 kinase activation in mammalian spatial learning. *Learn Mem* **6**, 478-490 (1999).
- 16 97. E. Valjent, J. C. Corvol, J. M. Trzaskos, J. A. Girault, D. Herve, Role of the ERK pathway  
17 in psychostimulant-induced locomotor sensitization. *BMC Neurosci* **7**, 20 (2006).
- 18 98. M. Bourin, M. Hascoet, The mouse light/dark box test. *Eur J Pharmacol* **463**, 55-65 (2003).
- 19 99. G. D. Barrenha, J. A. Chester, Genetic correlation between innate alcohol preference and  
20 fear-potentiated startle in selected mouse lines. *Alcohol Clin Exp Res* **31**, 1081-1088 (2007).
- 21 100. M. J. Ko, G. E. Mulia, R. M. van Rijn, Commonly Used Anesthesia/Euthanasia Methods  
22 for Brain Collection Differentially Impact MAPK Activity in Male and Female C57BL/6  
23 Mice. *Front Cell Neurosci* **13**, 96 (2019).
- 24 101. G. Paxinos, K. B. Franklin, *The mouse brain in stereotaxic coordinates*. (Gulf professional  
25 publishing, 2004).
- 26 102. J. W. Kim *et al.*, Social support rescues acute stress-induced cognitive impairments by  
27 modulating ERK1/2 phosphorylation in adolescent mice. *Sci Rep* **8**, 12003 (2018).
- 28 103. D. L. Walker, M. Davis, Quantifying fear potentiated startle using absolute versus  
29 proportional increase scoring methods: implications for the neurocircuitry of fear and  
30 anxiety. *Psychopharmacology (Berl)* **164**, 318-328 (2002).

1  
2  
3  
4  
5  
6  
7  
8  
9  
10  
11  
12  
13  
14  
15  
16  
17  
18  
19  
20  
21  
22

### **Acknowledgements**

We appreciate Dr. Marcus M. Weera for technical assistance with the fear-conditioning experiments. Included diagrams were created with BioRender.

### **Funding**

This work was funded by a NARSAD Young Investigator Award from the Brain and Behavior Research Foundation (#23603 to RMvR) and the National Institute on Alcohol Abuse and Alcoholism (AA025368, AA026949, AA026675) and Drug Abuse (DA045897).

### **Author Contributions**

MJ.K.: formal analysis, investigation, writing – original draft, writing – review & editing, visualization; T.C.: formal analysis, investigation, writing – review & editing; G.E.M.: formal analysis, investigation, writing – review & editing; A.A.M.: formal analysis, investigation; A.M.G.: formal analysis, investigation, writing – review & editing; A.L.: formal analysis, investigation; J.A.C.: formal analysis, writing – review & editing, supervision; R.M.vR.: Conceptualization, formal analysis, investigation, writing – original draft, writing – review & editing, visualization, supervision, project administration, funding acquisition.

### **Competing interests**

The authors declare that the research was conducted in the absence of any commercial or financial relationships that could be construed as a potential conflict of interest.



## 1 **Data and Materials Availability**

2 All data needed to evaluate the conclusions in the paper are present in the paper or the  
3 Supplementary Materials.

4

## 5 **Figure legends**

6 **Figure 1. Beneficial role for  $\beta$ -arrestin 2 in reducing anxiety-like behavior** (a) Structural  
7 similarity between AZD2327, a  $\delta$ OR agonist used in phase II clinical trials for anxious major  
8 depressive disorder and SNC80. (b) Scheme highlighting that SNC80 is  $\delta$ OR selective agonist,  
9 that activates  $G_i$  proteins but also strongly recruits  $\beta$ -arrestin 2. (c) Schematic diagram of the  
10 elevated plus maze test and dark-light box test. (d) Systemic administration of  $\beta$ -arrestin-biased  
11  $\delta$ OR agonist, SNC80 (20 mg/kg, s.c.), 30 minutes prior to the testing significantly increased  
12 percentage of time spent in open arms in WT mice (Control: n=15, SNC80: n=15) but not  $\beta$ -arrestin  
13 2 KO mice (Control: n=21, SNC80: n=21). (e) SNC80 increased percentage of time spent in light  
14 box in WT mice (Control: n=12, SNC80: n=11), but not in  $\beta$ -arrestin 2 KO mice (Control: n=20,  
15 SNC80: n=20). (f) The total time of movements were equal between drug treatments. (g) No  
16 statistical significance was observed in the total transitions between light and dark chambers.  
17 (Significance was calculated by two-way ANOVA followed by a Sidak's multiple comparison;  
18 \* $p < 0.05$ ; all values are shown as individual data points  $\pm$  S.E.M.).

19

20 **Figure 2. The anxiolytic agonist SNC80 activates ERK1/2 in vitro and in the limbic and**  
21 **striatal regions of the brain** (a) 10  $\mu$ M SNC80 strongly increased ERK1/2 phosphorylation,  
22 compared to p38 and JNK, in CHO cells stably expressing  $\delta$ OR and  $\beta$ -arrestin 2. A representative  
23 Western blot image is presented to the right. (b) SNC80 increased ERK1/2 phosphorylation in a

1 time-dependent manner, in NG-108-15 cells endogenously expressing  $\delta$ OR. A representative  
2 Western blot image is shown on the right. (c) Representative immunofluorescence staining images  
3 of the limbic regions and striatal regions in WT mice. SNC80 (20 mg/kg, i.p.) was administered  
4 10 minutes prior to the perfusion (Green: ERK; Red: pERK; Blue: DAPI). For stitching images  
5 (Left), 4x magnification was used to stitch the whole brain slices. Enlarged images (Right) were  
6 captured with 20x magnification. Corresponding locations of 20x images were marked in white  
7 square of 4x images (Scale bar for 4x represents 1000  $\mu$ M; Scale bar for 20x represents 100  $\mu$ M).  
8 (d) Representative images of brain sections with micropunctures of five specified brain regions  
9 for the Western blot analysis. (e-i) Activation of ERK1/2 protein activity following systemic  
10 administration of SNC80 in five wild-type mice brain regions. Representative Western blot images  
11 are depicted below the respective bar graph. The number of samples for (g-k) is listed in **Table**  
12 **S2**. (For (a), significance was measured by two-way ANOVA followed by a Dunnett's multiple  
13 comparison. For (b, g-k), significance was analyzed by one-way ANOVA followed by a Tukey's  
14 multiple comparison; \* $p < 0.05$ , \*\* $p < 0.01$ , \*\*\*\* $p < 0.0001$ ; all values are shown as individual  
15 data points  $\pm$  S.E.M.).

16  
17 **Figure 3. ERK1/2 activation in the amygdala and the dorsal hippocampus are  $\beta$ -arrestin 2**  
18 **dependent** (a) Representative immunofluorescence staining images of the limbic regions and  
19 striatal regions in  $\beta$ -arrestin 2 KO mice. SNC80 (20 mg/kg, i.p.) was administered 10 minutes prior  
20 to the perfusion (Green: ERK; Red: pERK; Blue: DAPI). For stitching images (Left), 10x  
21 magnification was used to stitch the whole brain slices. Enlarged images (Right) were captured  
22 with 20x magnification. Corresponding locations of 20x images were marked in white square of  
23 10x images (Scale bar for 10x represents 1000  $\mu$ M; Scale bar for 20x represents 100  $\mu$ M). (b)

1 Schematic diagram of the cellular context in  $\beta$ -arrestin 2 genetic KO mice. SNC80 (20 mg/kg, i.p.)  
2 induced ERK1/2 activation in the dorsal striatum (c) and nucleus accumbens (d).  $\beta$ -arrestin 2 KO  
3 ablated the SNC80-induced ERK1/2 activation in the dorsal hippocampus (e) and the amygdala (f)  
4 with no effects in the ventral hippocampus. (g) Representative Western blot images are shown  
5 to the right of the related bar graph. The number of samples for (c-g) is listed in **Table S2**.  
6 (Significance was analyzed by one-way ANOVA followed by a Tukey's multiple comparison; \*p  
7 < 0.05; all values are shown as individual data points  $\pm$  S.E.M.).

8

9 **Figure 4. ERK1/2 is required for the anxiolytic-like effects induced by SNC80 (a)** A

10 schematic diagram of SL327 induced inhibition of SNC80 mediated ERK1/2 signaling. (b)  
11 SL327 (50 mg/kg, s.c.), which was administered 60 minutes prior to the testing, attenuated the  
12 anxiolytic-like effects of SNC80 (20 mg/kg i.p.) administered 30 minutes prior to the testing in  
13 WT mice (control: n=8, SNC80: n=12, SNC+SL: n=12, SL327: n=12). (c-d) SL327 significantly  
14 inhibited SNC80-induced ERK1/2 phosphorylation in the dorsal hippocampus and the amygdala.  
15 SL327 was also administered 60 minutes prior to the testing, and SNC80 was administered 10  
16 minutes prior to the tissue collection. The number of samples for (c-d) is listed in **Table S3**.  
17 (Significance was calculated by one-way ANOVA followed by a Sidak's or Tukey's multiple  
18 comparison; \*p<0.05, \*\*p<0.01, \*\*\*p<0.001, \*\*\*\*p<0.0001, #p<0.05; all values are shown as  
19 individual data points  $\pm$  S.E.M.; SNC+SL means SNC80+SL327 and SL means SL327).

20

21 **Figure 5. Unique modulation of fear-potentiated startle (FPS) by a  $\beta$ -arrestin-biased and G**

22 **protein-biased  $\delta$ OR agonist (a)** Schematic representation of the three-day experimental

23 paradigm of the fear potentiated startle test; drugs were administered prior to the tests on the

1 third day (See **Figure S5** for Day 1 acoustic startle test). SNC80 (20 mg/kg, i.p.) was  
2 administered 30 minutes prior to the testing. **(b-d)** SNC80 (control: n=21, SNC80: n=21)  
3 reduced raw startle amplitudes to noise or light+noise and % FPS during the FPS test in WT  
4 mice. **(e-g)** SNC80 also reduced raw startle amplitudes to noise or light+noise and % FPS in  $\beta$ -  
5 arrestin 2 KO mice (control: n=8, SNC80: n=8). **(h-j)** Yet, G protein-biased agonist, TAN67,  
6 increased % FPS in WT mice (control: n=8, SNC80: n=8). (Significance was measured by two-  
7 way ANOVA followed by a Sidak's multiple comparison for (c, f, i) or unpaired t-test for (d, g,  
8 j). For (d)  $p=0.0085$ ; for (g)  $p=0.0003$ ; for (j)  $p<0.0001$ ; \* $p < 0.05$ , \*\* $p<0.01$ , \*\*\* $p < 0.001$ ,  
9 \*\*\*\* $p < 0.0001$ . All values are shown as individual data points  $\pm$  S.E.M.).

10

11 **Figure 6. Differential roles for G protein and  $\beta$ -arrestin 1 in  $\delta$ OR agonist-induced ERK1/2**  
12 **activation (a-e)** The G protein-biased  $\delta$ OR agonist TAN67 (25 mg/kg, i.p.), decreased the basal  
13 ERK1/2 activity in all tested brain regions of wild-type mice. Representative Western blot  
14 images are depicted next to each related bar graph. **(f-j)**. Systemic administration of SNC80 (20  
15 mg/kg, i.p.) did not activate ERK1/2 in the striatal regions of  $\beta$ -arrestin 1 KO mice but resulted  
16 in persistent ERK1/2 activation in the dorsal and ventral hippocampus and amygdala. The  
17 number of samples is listed in **Table S5**. (Significance was analyzed by one-way ANOVA  
18 followed by a Tukey's multiple comparison; \* $p < 0.05$ , \*\* $p<0.01$ ; all values are shown as  
19 individual data points  $\pm$  S.E.M.).

20

21 **Figure 7. Graphical summary**  $\delta$ OR agonists differentially induce ERK activation in a  $\beta$ -arrestin  
22 isoform specific manner to modulate anxiety- and conditioned fear-related behaviors. SNC80  
23 induced  $\beta$ -arrestin 2-mediated ERK1/2 activation (Cellular Makeup) in the hippocampus and

1 amygdala (Localization) decreased anxiety-like behavior (**a**), whereas an increase in conditioned  
2 fear-related behavior (Behavior) by TAN67 can be linked to decreased ERK1/2 activity in all  
3 tested brain regions except for the ventral hippocampus (**b**). Decreased FPS could not be correlated  
4 with G protein or  $\beta$ -arrestin 2 signaling, but may involve  $\beta$ -arrestin 1-dependent ERK1/2 signaling  
5 in the dorsal striatum and nucleus accumbens (**c**).  
6

1

## Figure 1

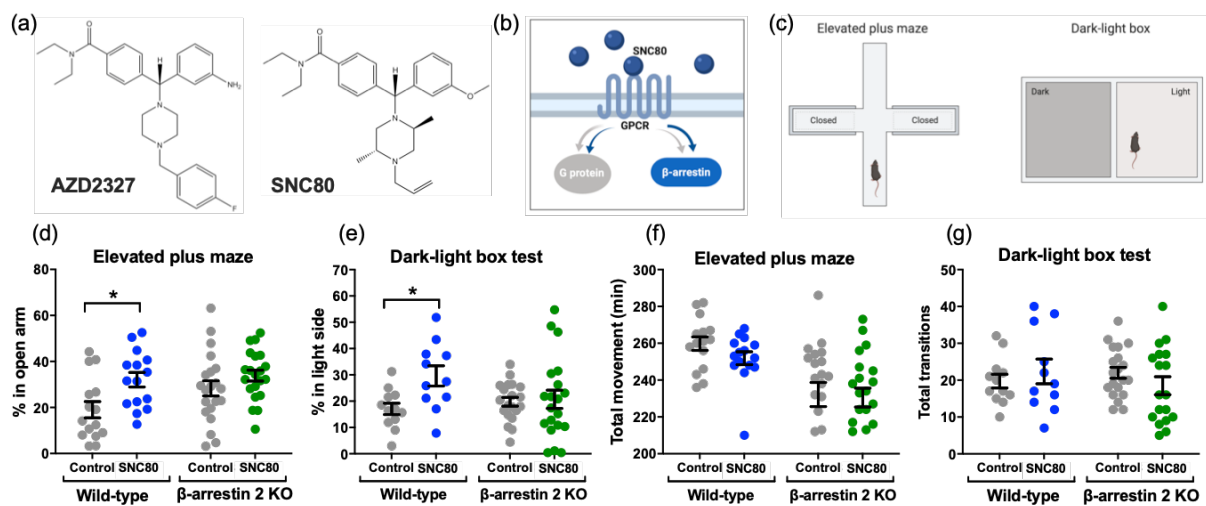

2

1

## Figure 2

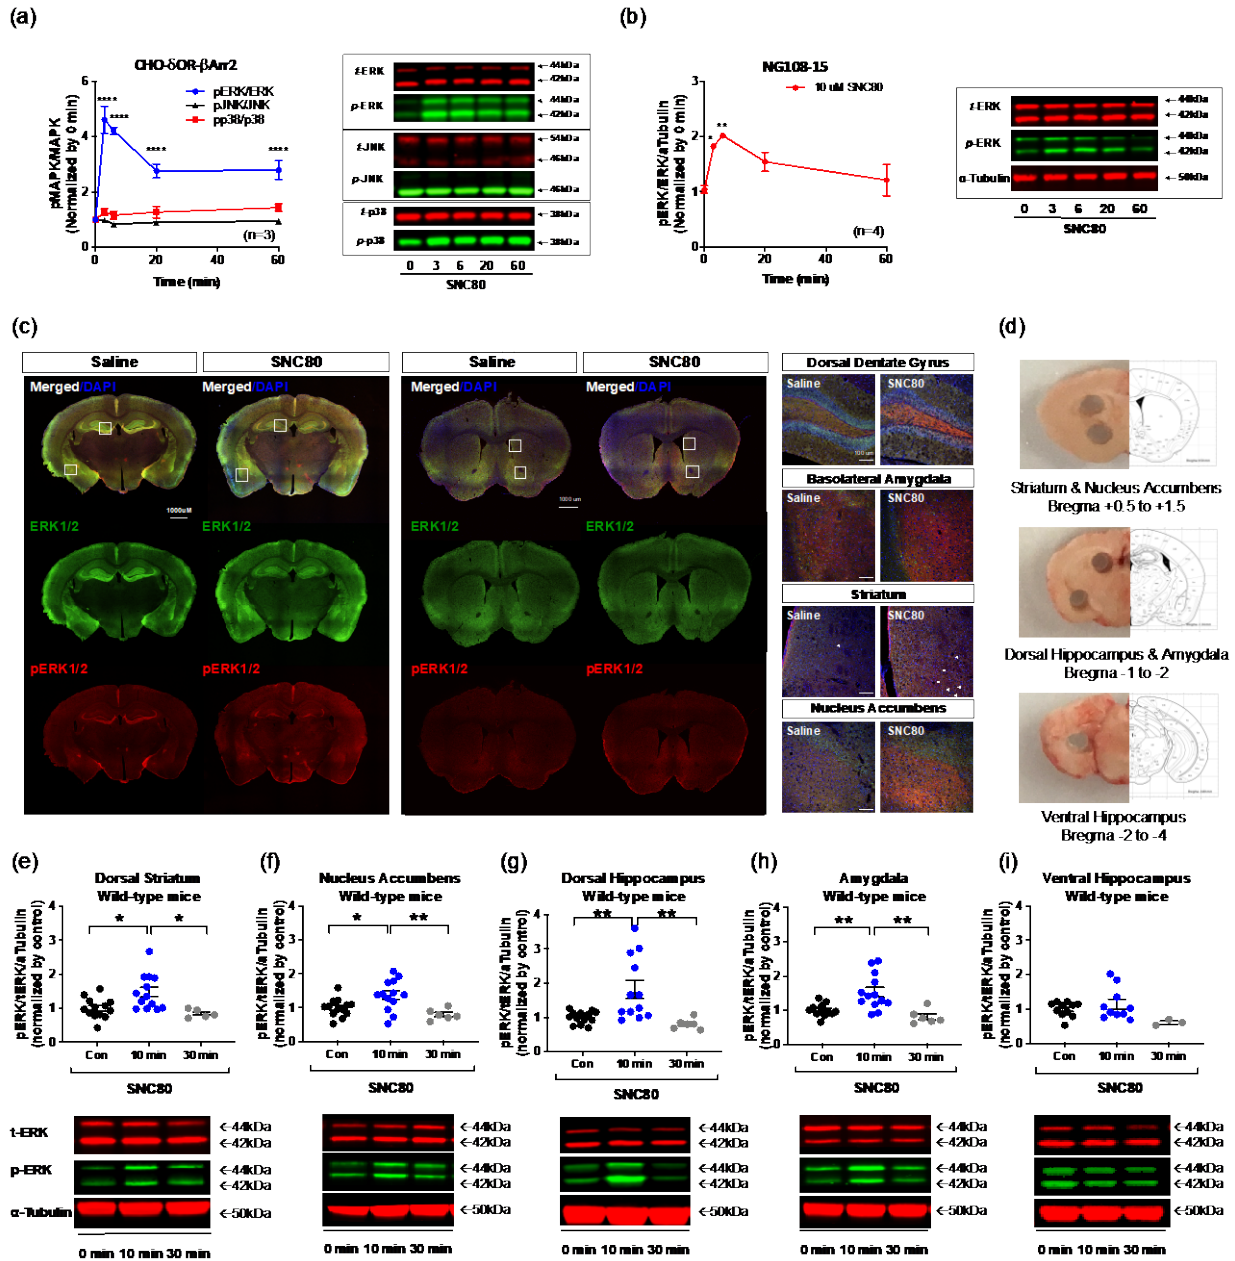

2



1

### Figure 3

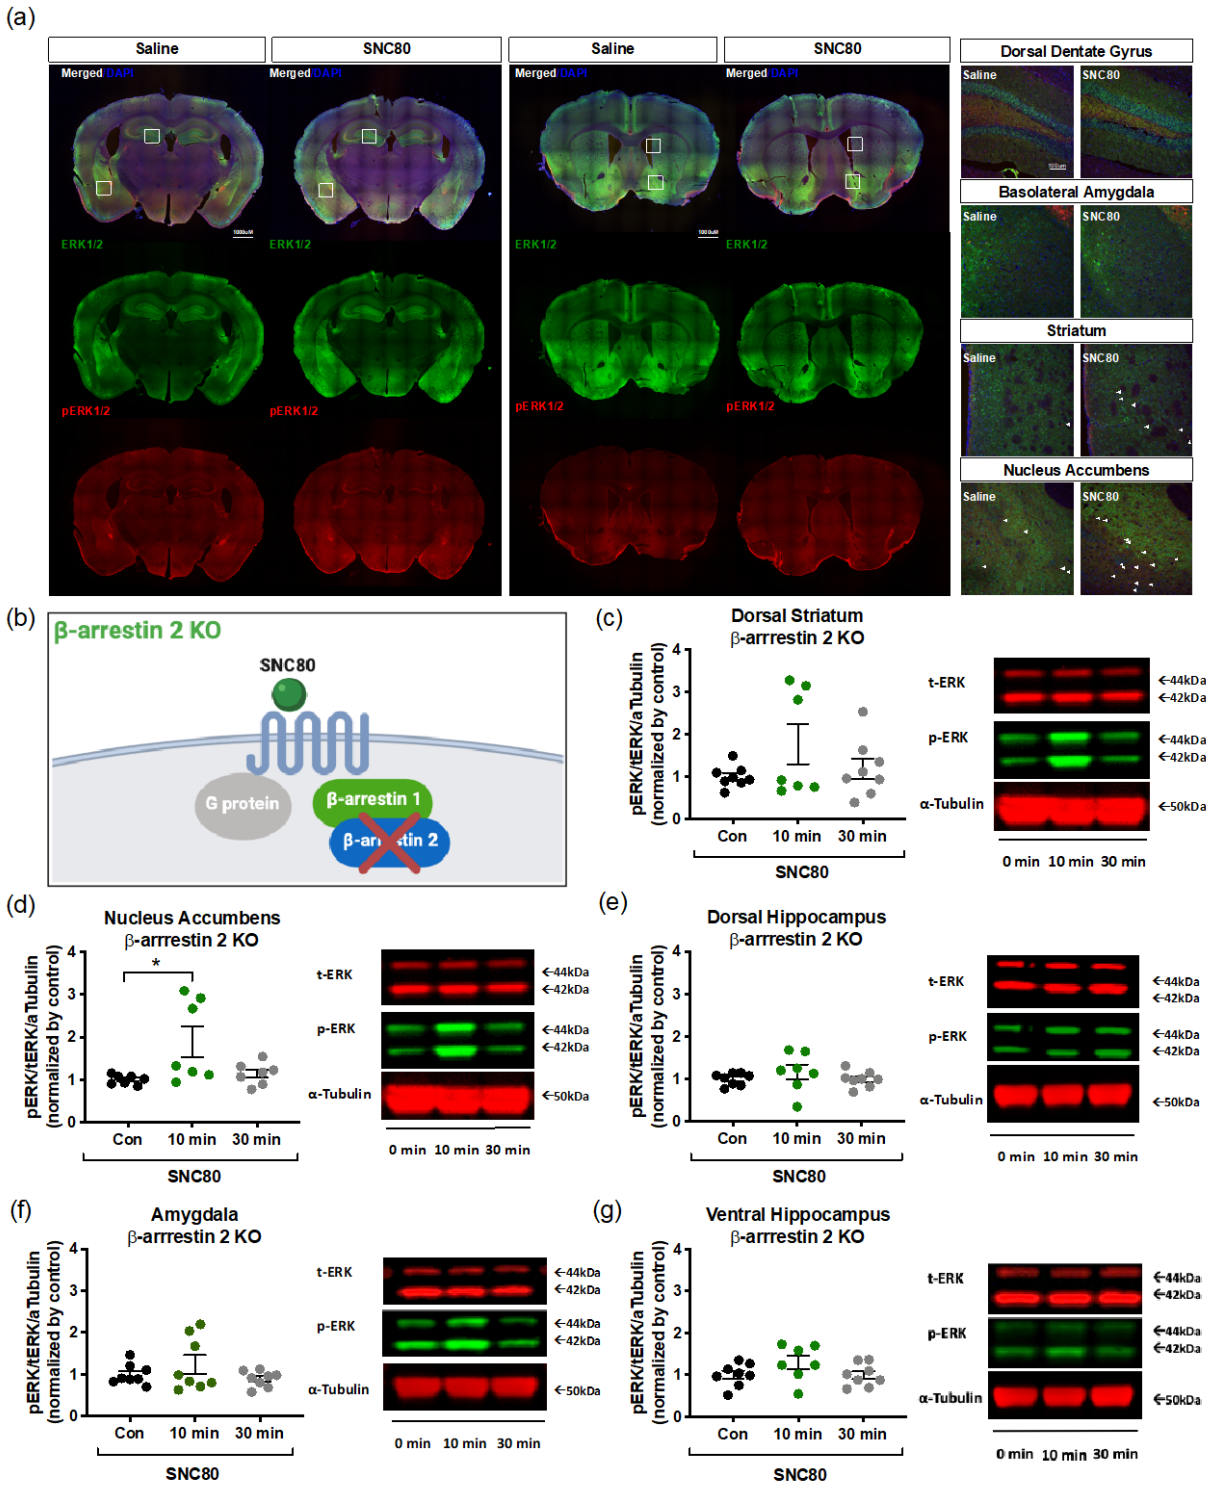

2



1

Figure 4

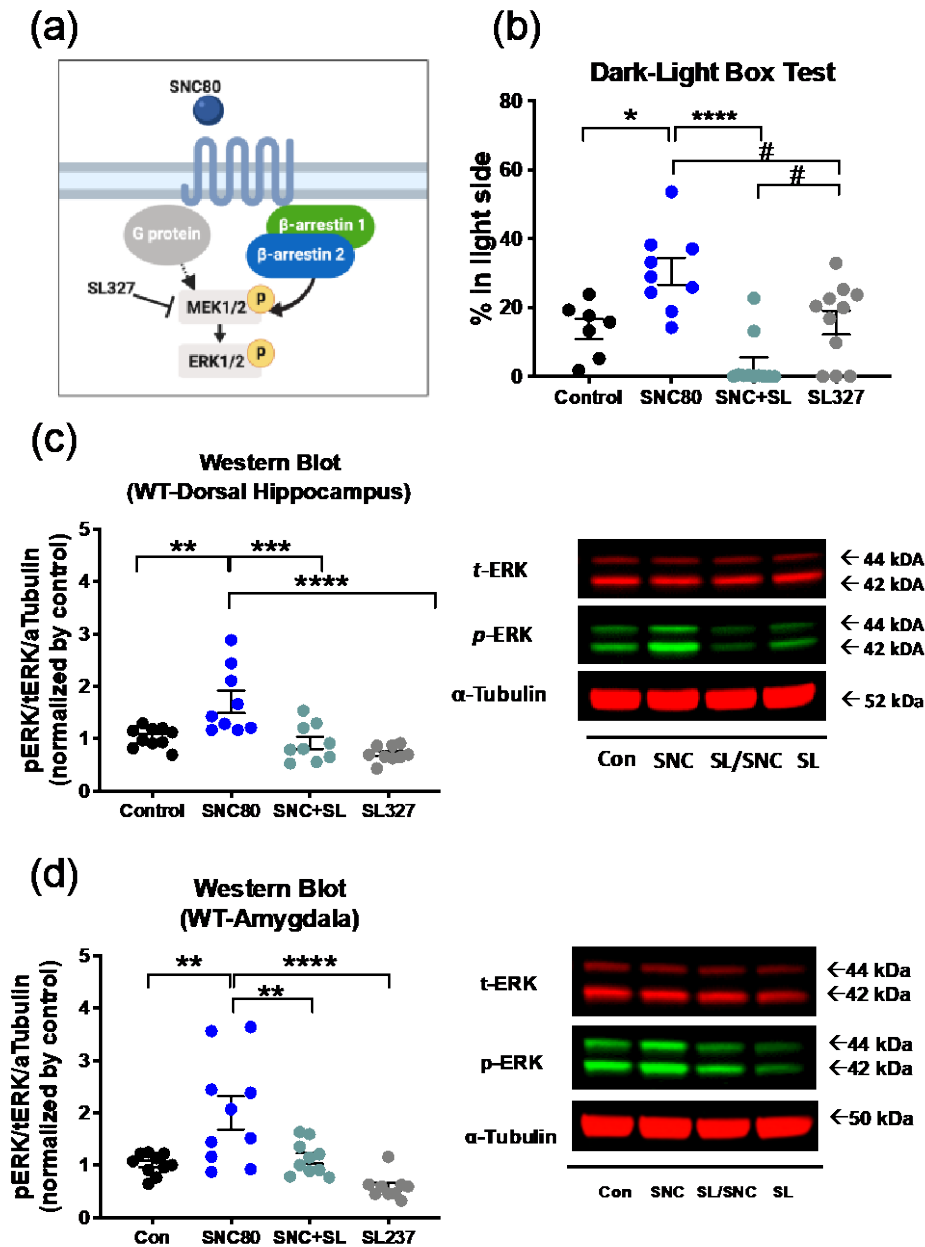

2

1

## Figure 5

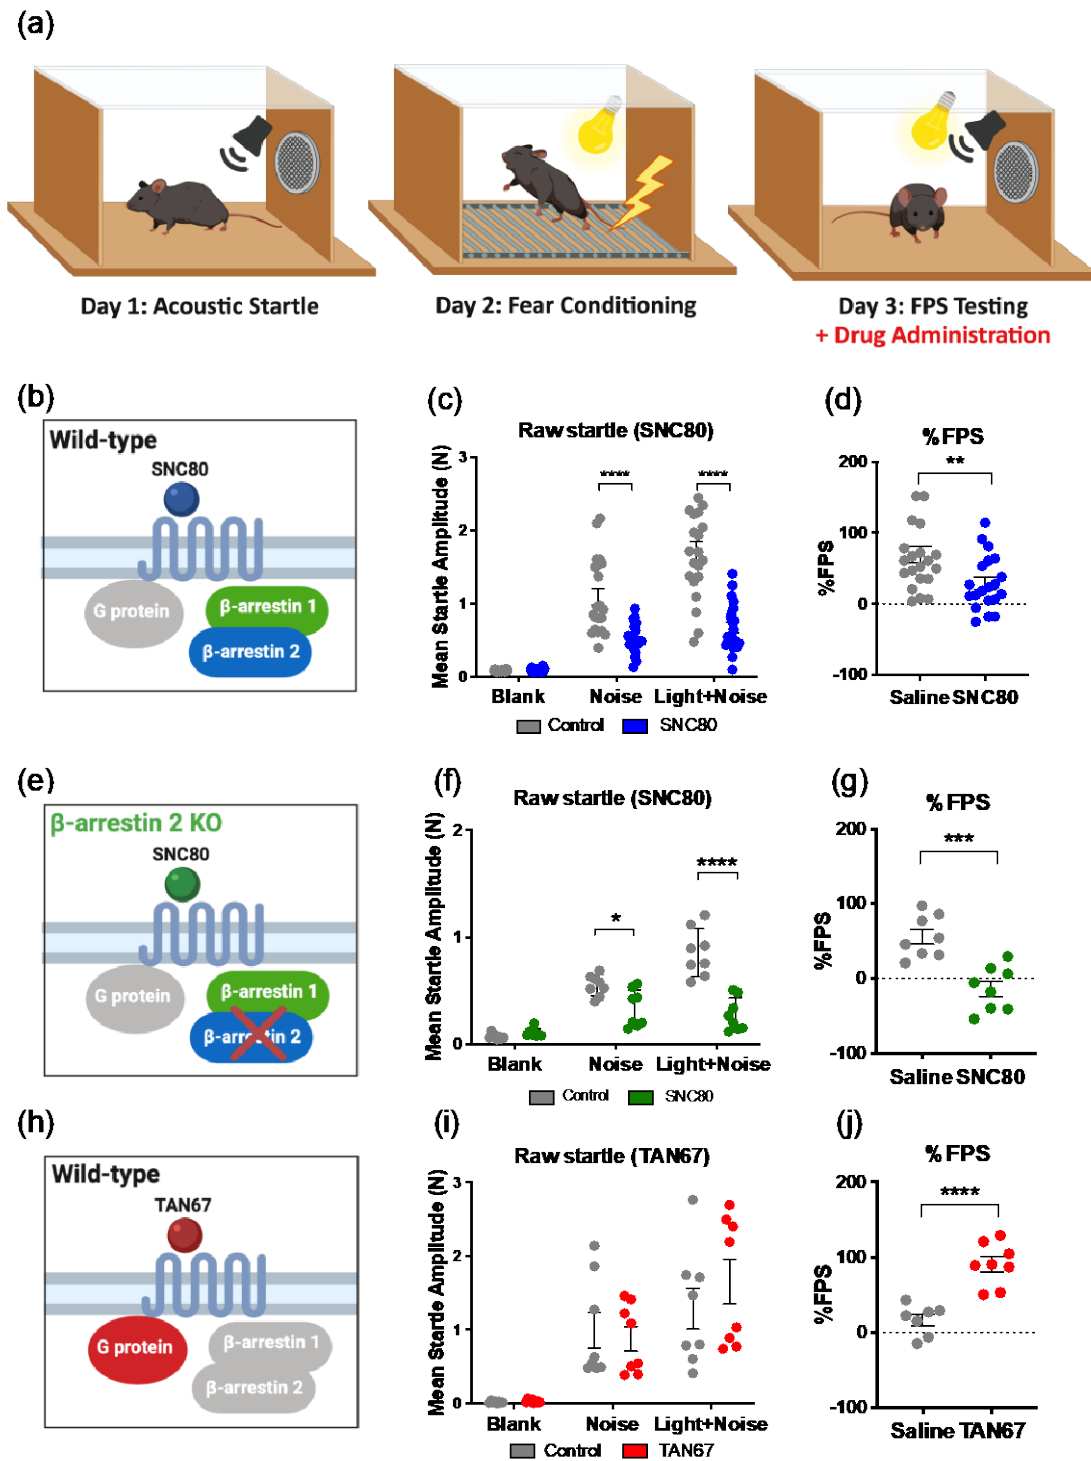

2

1

Figure 6

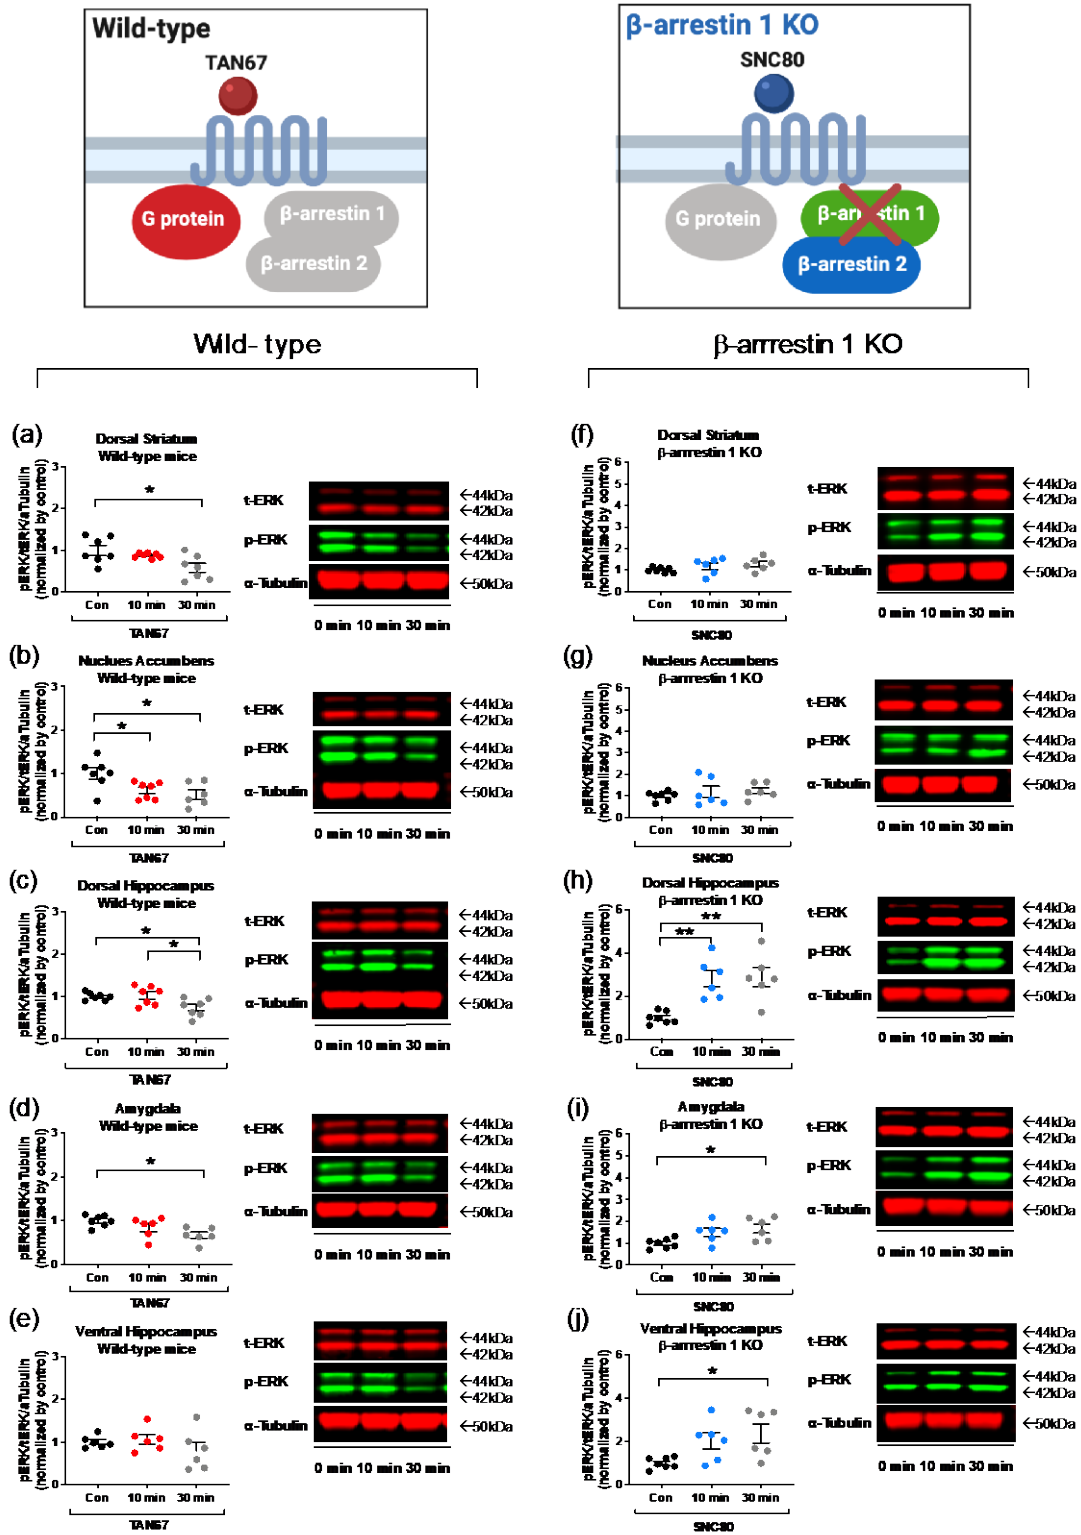

2

1

Figure 7

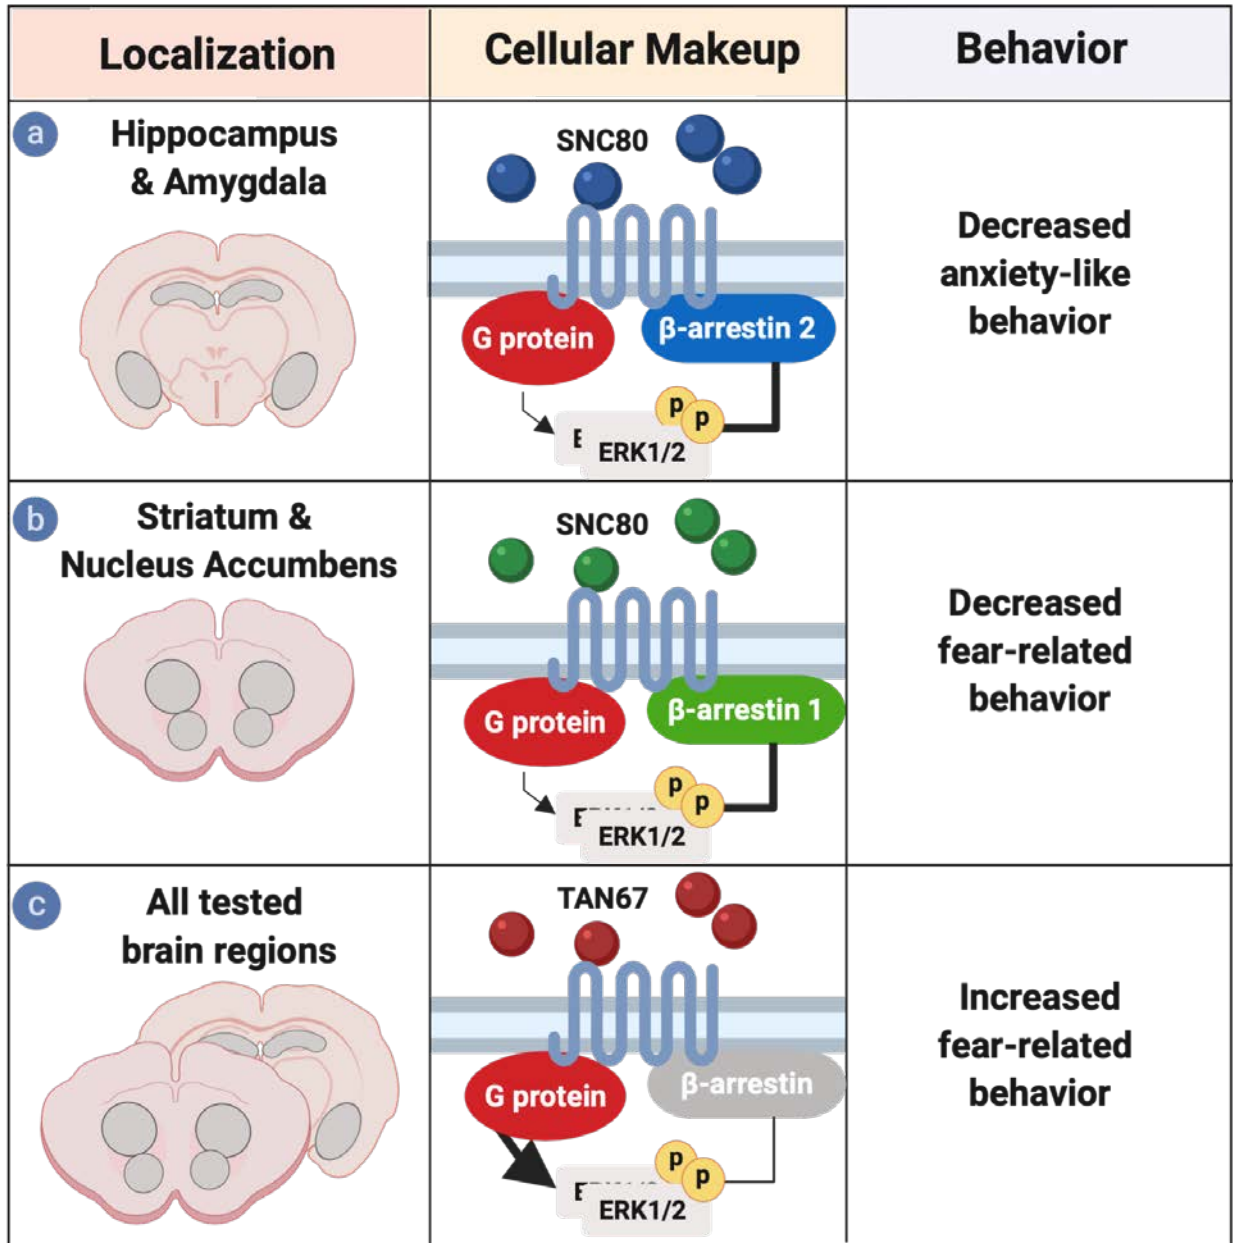

2

3
