# Supplementary material for: β-arrestin-dependent ERK signaling positively correlates with reduced anxiety-like and conditioned fear-related behavior in mice
Source: bioRxiv or medRxiv preprint supplement (doi:10.1101/790568), 2020-04-10
Supplement: Supplementary file [file media-1.pdf]

## Lists of Supplemental Materials

- 1
- 2 **Table S1.** Statistical analysis of anxiety-like behavior upon systemic administration of SNC80 in  
3 WT and  $\beta$ -arrestin 2 KO mice
- 4 **Table S2.** Statistical analysis of anxiety-like behavior and ERK1/2 expression levels upon time-  
5 series administration of SNC80 in WT and  $\beta$ -arrestin 2 KO mouse brain
- 6 **Table S3.** Statistical analysis of ERK1/2 expression levels upon administration of SNC80 in the  
7 presence/absence of SL327 in WT mouse brain
- 8 **Table S4.** Statistical analysis of fear-related behavior upon systemic administration of SNC80 or  
9 TAN67 in WT and  $\beta$ -arrestin 2 KO mice
- 10 **Table S5.** Statistical analysis of ERK1/2 expression levels upon time-series administration of  
11 TAN67 in WT mouse and SNC80 in  $\beta$ -arrestin 1 KO mouse brain
- 12 **Table S6.** Antibody information for the Western blot
- 13 **Fig. S1.** Locomotor effects of drug/vehicle treatment in the WT or  $\beta$ -arrestin 2 KO mice in the  
14 dark light upon administration of drugs
- 15 **Fig. S2.** SNC80 does not activate ERK1/2 in the dorsal hippocampus and the amygdala of  $\delta$ OR  
16 KO mice
- 17 **Fig. S3.** SNC80-induced ERK1/2 activation is partly affected by SL327 in the striatal regions of  
18 the brain
- 19 **Fig. S4.** A  $\delta$ OR agonist, ADL5859, does not affect ERK1/2 activity and anxiety-like behaviors of  
20 WT mice
- 21 **Fig. S5.** Mice groups for FPS tests were counterbalanced based on baseline acoustic startle  
22 response
- 23 **Fig. S6.** A low dose SNC80 does not affect fear-related behavior of WT mice

- 1 **Fig. S7.**  $\beta$ -arrestin 1 recruitment levels by G-protein-biased (TAN67),  $\beta$ -arrestin-biased (SNC80),
- 2 and non-biased (Leu-Enk)  $\delta$ OR agonist in U2OS- $\delta$ OR- $\beta$ Arr1 cells
- 3 **Fig. S8.** A diagram representing the pharmacological competition between two biased agonists
- 4 and an endogenous opioid in relations to their ability to modulate ERK1/2 signaling

## Supplemental Materials

1

2 **Table S1. Statistical analysis of anxiety-like behavior upon systemic administration of SNC80 in WT and  $\beta$ -arrestin 2 KO mice**

3 Statistical differences of anxiety-like behaviors in WT or  $\beta$ -arrestin 2 KO mice shown in **Fig. 1**. Significance between groups was

4 calculated by two-way ANOVA followed by a Sidak's multiple comparison (\* $p < 0.05$ , and ns=not significant).

| Subfigure   | Behavior test                                  | Genotype            | Drug                                          | # of samples                                                     | Test               | Source of Variation                           | F-value                                                     | p-value                                | Post hoc analysis                | Group Comparison                          | Mean Diff.                                                                                                                       | p-value                                                               | Significance                                              | -                                   |
|-------------|------------------------------------------------|---------------------|-----------------------------------------------|------------------------------------------------------------------|--------------------|-----------------------------------------------|-------------------------------------------------------------|----------------------------------------|----------------------------------|-------------------------------------------|----------------------------------------------------------------------------------------------------------------------------------|-----------------------------------------------------------------------|-----------------------------------------------------------|-------------------------------------|
| Figure 1-d  | Elevated plus maze test                        | WT & $\beta$ arr2KO | SNC80 (20 mg/kg, s.c.)                        | WT Control: 15<br>WT-SNC80: 15<br>B2 Control: 21<br>B2-SNC80: 21 | Two-Way ANOVA test | Interaction<br>Genotype factor<br>Drug factor | F (1,68) = 1.429<br>F (1,68) = 3.15<br>F (1,68) = 8.781     | 0.236<br>0.0804<br>0.0042              | Sidak's Multiple Comparison Test | WT: Con vs. SNC80<br>B2 KO: Con vs. SNC80 | -13.0400<br>-5.5450                                                                                                              | 0.0164<br>0.3200                                                      | *<br>ns                                                   |                                     |
| Figure 1-e  | Dark light box test                            | WT & $\beta$ arr2KO | SNC80 (20 mg/kg, s.c.)                        | WT Control: 12<br>WT-SNC80: 11<br>B2 Control: 20<br>B2-SNC80: 20 | Two-Way ANOVA test | Interaction<br>Genotype factor<br>Drug factor | F (1,59) = 3.677<br>F (1,59) = 1.039<br>F (1,59) = 4.978    | 0.06<br>0.3122<br>0.0295               | Sidak's Multiple Comparison Test | WT: Con vs. SNC80<br>B2 KO: Con vs. SNC80 | -12.5200<br>-0.9467                                                                                                              | 0.0232<br>0.9584                                                      | *<br>ns                                                   |                                     |
| Figure 1-f  | Elevated plus maze test (Total movement - min) | WT & $\beta$ arr2KO | SNC80 (20 mg/kg, s.c.)                        | WT Control: 15<br>WT-SNC80: 15<br>B2 Control: 21<br>B2-SNC80: 21 | Two-Way ANOVA test | Interaction<br>Genotype factor<br>Drug factor | F (1,68) = 0.3392<br>F (1,68) = 20.7<br>F (1,68) = 0.796    | 0.5622<br><0.0001<br>0.3754            | Sidak's Multiple Comparison Test | WT: Con vs. SNC80<br>B2 KO: Con vs. SNC80 | 7.9330<br>1.6670                                                                                                                 | 0.5615<br>0.9643                                                      | ns<br>ns                                                  |                                     |
| Figure 1-g  | Dark light box test (Total transition)         | WT & $\beta$ arr2KO | SNC80 (20 mg/kg, s.c.)                        | WT Control: 12<br>WT-SNC80: 11<br>B2 Control: 20<br>B2-SNC80: 18 | Two-Way ANOVA test | Interaction<br>Genotype factor<br>Drug factor | F (1,57) = 1.754<br>F (1,57) = 0.1222<br>F (1,57) = 0.03687 | 0.1907<br>0.728<br>0.8484              | Sidak's Multiple Comparison Test | WT: Con vs. SNC80<br>B2 KO: Con vs. SNC80 | -2.6140<br>3.5000                                                                                                                | 0.7254<br>0.3949                                                      | ns<br>ns                                                  |                                     |
| Figure S1-a | Dark light box test (Total distance - cm)      | WT & $\beta$ arr2KO | SNC80 (20 mg/kg, s.c.)                        | WT Control: 12<br>WT-SNC80: 11<br>B2 Control: 20<br>B2-SNC80: 20 | Two-Way ANOVA test | Interaction<br>Genotype factor<br>Drug factor | F (1,59) = 1.949<br>F (1,59) = 15.40<br>F (1,59) = 19.78    | P = 0.1679<br>P = 0.0002<br>P = 0.0001 | Sidak's Multiple Comparison Test | WT: Con vs. SNC80<br>B2 KO: Con vs. SNC80 | -390.0000<br>-204.1000                                                                                                           | 0.0011<br>0.0283                                                      | **<br>*                                                   |                                     |
| Subfigure   | Brain region                                   | Genotype            | Drug                                          | # of samples                                                     | Test               | F-value                                       | p-value                                                     | Group                                  | Mean                             | Post hoc analysis                         | Group Comparison                                                                                                                 | Mean Diff.                                                            | p-value                                                   | Significance                        |
| Figure S1-b | Dark light box test (Total distance - cm)      | WT                  | SNC80 (20 mg/kg, Ip) or SL327 (50 mg/kg s.c.) | Con: 19<br>SNC80: 10<br>SNC+SL: 12<br>SL327: 12                  | One-Way ANOVA test | F (3, 49) = 9.037                             | P < 0.0001                                                  | Control<br>SNC80<br>SNC+SL327<br>SL327 | 811.8<br>1090<br>663.2<br>705.8  | Tukey's Multiple Comparison Test          | Control vs. SNC80<br>Control vs. SNC+SL327<br>Control vs. SL327<br>SNC80 vs. SNC+SL327<br>SNC80 vs. SL327<br>SNC+SL327 vs. SL327 | -278.1000<br>149.0000<br>106.0000<br>426.7000<br>384.2000<br>-42.5000 | 0.0067<br>0.2258<br>0.5155<br><0.0001<br>0.0004<br>0.9585 | **<br>ns<br>ns<br>****<br>***<br>ns |

5

1 **Table S2. Statistical analysis of ERK1/2 expression levels upon time-series administration of SNC80 in WT and  $\beta$ -arrestin 2 KO**  
2 **mouse brain** Statistical differences of ERK1/2 expression levels in WT mice shown in **Fig. 2** and  $\beta$ -arrestin 2 KO mice in **Fig. 3**.  
3 Significance between groups was calculated by one-way ANOVA followed by a Tukey's multiple comparison ( $*p<0.05$ ,  $**p<0.01$ , and  
4 ns=not significant).

| Subfigure  | Brain region        | Genotype        | Drug                 | # of samples | Test               | F-value            | p-value  | Group  | Mean              | Post hoc analysis                | Group Comparison | Mean Diff. | p-value | Significance |
|------------|---------------------|-----------------|----------------------|--------------|--------------------|--------------------|----------|--------|-------------------|----------------------------------|------------------|------------|---------|--------------|
| Figure 2 e | Dorsal Striatum     | WT              | SNC80 (20 mg/kg, ip) | Conc 13      | One-Way ANOVA test | F (2,28) = 6.776   | P=0.0040 | Con    | 1                 | Tukey's Multiple Comparison Test | Convs. 10 min    | -0.4718    | 0.0128  | *            |
|            |                     |                 |                      | 10 min       |                    |                    |          | 14.72  | Convs. 30 min     |                                  | 0.4534           | 0.7398     | ns      |              |
|            |                     |                 |                      | 30 min       |                    |                    |          | 0.8466 | 10 min vs. 30 min |                                  | 0.6253           | 0.0140     | *       |              |
| Figure 2 f | Nucleus Acumbens    | WT              | SNC80 (20 mg/kg, ip) | Conc 13      | One-Way ANOVA test | F (2,29) = 6.645   | P=0.0042 | Con    | 1                 | Tukey's Multiple Comparison Test | Convs. 10 min    | -0.3632    | 0.0317  | *            |
|            |                     |                 |                      | 10 min       |                    |                    |          | 1.363  | Convs. 30 min     |                                  | 0.2070           | 0.4563     | ns      |              |
|            |                     |                 |                      | 30 min       |                    |                    |          | 0.793  | 10 min vs. 30 min |                                  | 0.5702           | 0.0064     | **      |              |
| Figure 2 g | Dorsal Hippocampus  | WT              | SNC80 (20 mg/kg, ip) | Conc 13      | One-Way ANOVA test | F (2,28) = 8.252   | P=0.0015 | Con    | 1                 | Tukey's Multiple Comparison Test | Convs. 10 min    | 0.8194     | 0.0051  | **           |
|            |                     |                 |                      | 10 min       |                    |                    |          | 1.819  | Convs. 30 min     |                                  | 0.1918           | 0.7923     | ns      |              |
|            |                     |                 |                      | 30 min       |                    |                    |          | 0.8982 | 10 min vs. 30 min |                                  | 1.0110           | 0.0056     | **      |              |
| Figure 2 h | Amygdala            | WT              | SNC80 (20 mg/kg, ip) | Conc 13      | One-Way ANOVA test | F (2,29) = 10.82   | P=0.0003 | Con    | 1                 | Tukey's Multiple Comparison Test | Convs. 10 min    | -0.5254    | 0.0024  | **           |
|            |                     |                 |                      | 10 min       |                    |                    |          | 1.526  | Convs. 30 min     |                                  | 0.4940           | 0.5284     | ns      |              |
|            |                     |                 |                      | 30 min       |                    |                    |          | 0.806  | 10 min vs. 30 min |                                  | 0.7204           | 0.0010     | **      |              |
| Figure 2 i | Ventral Hippocampus | WT              | SNC80 (20 mg/kg, ip) | Conc 11      | One-Way ANOVA test | F (2,21) = 2.82    | P=0.0823 | Con    | 1                 | Tukey's Multiple Comparison Test | Convs. 10 min    | -0.1379    | 0.6248  | ns           |
|            |                     |                 |                      | 10 min       |                    |                    |          | 1.138  | Convs. 30 min     |                                  | 0.3882           | 0.2039     | ns      |              |
|            |                     |                 |                      | 30 min       |                    |                    |          | 0.6108 | 10 min vs. 30 min |                                  | 0.5271           | 0.0676     | ns      |              |
| Figure 3 c | Dorsal Striatum     | $\beta$ arr2 KO | SNC80 (20 mg/kg, ip) | Conc 8       | One-Way ANOVA test | F (2, 20) = 1.873  | P=0.1220 | Con    | 1                 | Tukey's Multiple Comparison Test | Convs. 10 min    | 0.7647     | 0.1895  | ns           |
|            |                     |                 |                      | 10 min       |                    |                    |          | 1.785  | Convs. 30 min     |                                  | -0.1857          | 0.8887     | ns      |              |
|            |                     |                 |                      | 30 min       |                    |                    |          | 1.196  | 10 min vs. 30 min |                                  | 0.5790           | 0.3688     | *       |              |
| Figure 3 d | Nucleus Acumbens    | $\beta$ arr2 KO | SNC80 (20 mg/kg, ip) | Conc 7       | One-Way ANOVA test | F (2, 18) = 4.903  | P=0.0200 | Con    | 1                 | Tukey's Multiple Comparison Test | Convs. 10 min    | -0.8913    | 0.0240  | *            |
|            |                     |                 |                      | 10 min       |                    |                    |          | 1.891  | Convs. 30 min     |                                  | -0.1407          | 0.8907     | ns      |              |
|            |                     |                 |                      | 30 min       |                    |                    |          | 1.141  | 10 min vs. 30 min |                                  | 0.7506           | 0.0688     | ns      |              |
| Figure 3 e | Dorsal Hippocampus  | $\beta$ arr2 KO | SNC80 (20 mg/kg, ip) | Conc 8       | One-Way ANOVA test | F (2, 20) = 0.8178 | P=0.4556 | Con    | 1                 | Tukey's Multiple Comparison Test | Convs. 10 min    | -0.1854    | 0.5183  | ns           |
|            |                     |                 |                      | 10 min       |                    |                    |          | 1.165  | Convs. 30 min     |                                  | 0.0024           | 0.9988     | ns      |              |
|            |                     |                 |                      | 30 min       |                    |                    |          | 0.9976 | 10 min vs. 30 min |                                  | 0.1678           | 0.5086     | ns      |              |
| Figure 3 f | Amygdala            | $\beta$ arr2 KO | SNC80 (20 mg/kg, ip) | Conc 8       | One-Way ANOVA test | F (2, 21) = 1.472  | P=0.2522 | Con    | 1                 | Tukey's Multiple Comparison Test | Convs. 10 min    | 0.2360     | 0.4909  | ns           |
|            |                     |                 |                      | 10 min       |                    |                    |          | 1.236  | Convs. 30 min     |                                  | 0.1028           | 0.8631     | ns      |              |
|            |                     |                 |                      | 30 min       |                    |                    |          | 0.8942 | 10 min vs. 30 min |                                  | 0.3418           | 0.2376     | ns      |              |
| Figure 3 g | Ventral Hippocampus | $\beta$ arr2 KO | SNC80 (20 mg/kg, ip) | Conc 8       | One-Way ANOVA test | F (2, 20) = 2.035  | P=0.1569 | Con    | 1                 | Tukey's Multiple Comparison Test | Convs. 10 min    | -0.2905    | 0.2167  | ns           |
|            |                     |                 |                      | 10 min       |                    |                    |          | 1.291  | Convs. 30 min     |                                  | 0.0098           | 0.9980     | ns      |              |
|            |                     |                 |                      | 30 min       |                    |                    |          | 0.9982 | 10 min vs. 30 min |                                  | 0.3003           | 0.1968     | ns      |              |

5

6

1 **Table S3. Statistical analysis of anxiety-like behavior and ERK1/2 expression levels upon administration of SNC80 in the**  
2 **presence/absence of SL327 in WT mouse brain** Statistical differences of anxiety-like behavior and ERK1/2 expression levels in WT  
3 mouse brain shown in **Fig. 4** and **Fig. S3**. Significance between groups was calculated by one-way ANOVA followed by a Tukey's  
4 multiple comparison (\* $p < 0.05$ , \*\* $p < 0.01$ , \*\*\* $p < 0.001$ , and ns=not significant).

| Subfigure   | Behavior test or Brain region | Genotype | Drug                                          | # of samples                                    | Test               | F-value           | p-value  | Group     | Mean   | Post hoc analysis                | Group Comparison      | Mean Diff. | p-value | Significance |
|-------------|-------------------------------|----------|-----------------------------------------------|-------------------------------------------------|--------------------|-------------------|----------|-----------|--------|----------------------------------|-----------------------|------------|---------|--------------|
| Figure 4 b  | Dark-light box test           | WT       | SNC80 (20 mg/kg, Ip) or SL327 (50 mg/kg s.c.) | Conc: 7<br>SNC80: 9<br>SNC+SL: 11<br>SL327: 11  | One-Way ANOVA test | F (3, 34) = 12.35 | P<0.0001 | Control   | 13.88  | Tukey's Multiple Comparison Test | Control vs. SNC80     | -16.6400   | 0.0109  | *            |
|             |                               |          |                                               |                                                 |                    |                   |          | SNC80     | 30.53  |                                  | Control vs. SNC+SL327 | 10.4600    | 0.1496  | ns           |
|             |                               |          |                                               |                                                 |                    |                   |          | SNC+SL327 | 3.418  |                                  | Control vs. SL327     | -1.7530    | 0.9830  | ns           |
|             |                               |          |                                               |                                                 |                    |                   |          | SL327     | 15.64  |                                  | SNC80 vs. SNC+SL327   | 27.1100    | <0.0001 | ***          |
|             |                               |          |                                               |                                                 |                    |                   |          |           |        |                                  | SNC80 vs. SL327       | 14.8900    | 0.0106  | *            |
| Figure 4 c  | Dorsal Hippocampus            | WT       | SNC80 (20 mg/kg, Ip) or SL327 (50 mg/kg s.c.) | Conc: 10<br>SNC80: 9<br>SNC+SL: 9<br>SL327: 9   | One-Way ANOVA test | F (3, 33) = 11.68 | P<0.0001 | Control   | 1      | Tukey's Multiple Comparison Test | Control vs. SNC80     | -0.6767    | 0.0024  | **           |
|             |                               |          |                                               |                                                 |                    |                   |          | SNC80     | 1.706  |                                  | Control vs. SNC+SL327 | 0.1076     | 0.9247  | ns           |
|             |                               |          |                                               |                                                 |                    |                   |          | SNC+SL327 | 0.9214 |                                  | Control vs. SL327     | 0.3169     | 0.2790  | ns           |
|             |                               |          |                                               |                                                 |                    |                   |          | SL327     | 0.7122 |                                  | SNC80 vs. SNC+SL327   | 0.7843     | 0.0005  | ***          |
|             |                               |          |                                               |                                                 |                    |                   |          |           |        |                                  | SNC80 vs. SL327       | 0.9536     | <0.0001 | ***          |
| Figure 4 d  | Amygdala                      | WT       | SNC80 (20 mg/kg, Ip) or SL327 (50 mg/kg s.c.) | Conc: 10<br>SNC80: 10<br>SNC+SL: 10<br>SL327: 9 | One-Way ANOVA test | F (3, 35) = 10.9  | P<0.0001 | Control   | 1      | Tukey's Multiple Comparison Test | Control vs. SNC80     | -0.9708    | 0.0021  | **           |
|             |                               |          |                                               |                                                 |                    |                   |          | SNC80     | 2.003  |                                  | Control vs. SNC+SL327 | -0.1093    | 0.9713  | ns           |
|             |                               |          |                                               |                                                 |                    |                   |          | SNC+SL327 | 1.133  |                                  | Control vs. SL327     | 0.4325     | 0.3442  | ns           |
|             |                               |          |                                               |                                                 |                    |                   |          | SL327     | 0.5908 |                                  | SNC80 vs. SNC+SL327   | 0.8705     | 0.0069  | **           |
|             |                               |          |                                               |                                                 |                    |                   |          |           |        |                                  | SNC80 vs. SL327       | 1.4120     | <0.0001 | ***          |
| Figure S3 a | Dorsal Striatum               | WT       | SNC80 (20 mg/kg, Ip) or SL327 (50 mg/kg s.c.) | Conc: 9<br>SNC80: 9<br>SNC+SL: 9<br>SL327: 9    | One-Way ANOVA test | F (3, 32) = 6.421 | P=0.0016 | Control   | 1      | Tukey's Multiple Comparison Test | Control vs. SNC80     | 0.5419     | 0.1677  | ns           |
|             |                               |          |                                               |                                                 |                    |                   |          | SNC80     | 1.543  |                                  | Control vs. SNC+SL327 | -0.5429    | 0.247   | *            |
|             |                               |          |                                               |                                                 |                    |                   |          | SNC+SL327 | 1.115  |                                  | Control vs. SL327     | -0.1155    | 0.9380  | ns           |
|             |                               |          |                                               |                                                 |                    |                   |          | SL327     | 0.7734 |                                  | SNC80 vs. SNC+SL327   | 0.2266     | 0.5960  | ns           |
|             |                               |          |                                               |                                                 |                    |                   |          |           |        |                                  | SNC80 vs. SL327       | 0.4274     | 0.1032  | ns           |
| Figure S3 b | Nucleus Accumbens             | WT       | SNC80 (20 mg/kg, Ip) or SL327 (50 mg/kg s.c.) | Conc: 10<br>SNC80: 10<br>SNC+SL: 10<br>SL327: 9 | One-Way ANOVA test | F (3, 35) = 2.672 | P=0.0624 | Control   | 1      | Tukey's Multiple Comparison Test | SNC80 vs. SL327       | 0.7684     | 0.0008  | ***          |
|             |                               |          |                                               |                                                 |                    |                   |          | SNC80     | 1.319  |                                  | SNC+SL327 vs. SL327   | 0.3420     | 0.2490  | ns           |
|             |                               |          |                                               |                                                 |                    |                   |          | SNC+SL327 | 1.04   |                                  | Control vs. SNC80     | -0.3193    | 0.3248  | ns           |
|             |                               |          |                                               |                                                 |                    |                   |          | SL327     | 0.7077 |                                  | Control vs. SNC+SL327 | -0.0404    | 0.9963  | ns           |
|             |                               |          |                                               |                                                 |                    |                   |          |           |        |                                  | Control vs. SL327     | 0.2123     | 0.6009  | ns           |
| Figure S3 c | Ventral Hippocampus           | WT       | SNC80 (20 mg/kg, Ip) or SL327 (50 mg/kg s.c.) | Conc: 10<br>SNC80: 9<br>SNC+SL: 10<br>SL327: 9  | One-Way ANOVA test | F (3, 34) = 2.734 | P=0.0588 | Control   | 1      | Tukey's Multiple Comparison Test | SNC80 vs. SNC+SL327   | 0.2790     | 0.4427  | ns           |
|             |                               |          |                                               |                                                 |                    |                   |          | SNC80     | 1.164  |                                  | SNC80 vs. SL327       | 0.5316     | 0.0304  | *            |
|             |                               |          |                                               |                                                 |                    |                   |          | SNC+SL327 | 0.7711 |                                  | SNC80 vs. SNC+SL327   | 0.3869     | 0.0625  | ns           |
|             |                               |          |                                               |                                                 |                    |                   |          | SL327     | 0.8315 |                                  | SNC80 vs. SL327       | 0.3325     | 0.1549  | ns           |
|             |                               |          |                                               |                                                 |                    |                   |          |           |        |                                  | SNC+SL327 vs. SL327   | -0.0545    | 0.9833  | ns           |

5

- 1 **Table S4. Statistical analysis of fear-related behavior upon systemic administration of SNC80 or TAN67 in WT and  $\beta$ -arrestin**
- 2 **2 KO mice** Statistical differences of fear-related behaviors in WT or  $\beta$ -arrestin 2 KO mice shown in **Fig. 5**. Significance between groups
- 3 was calculated by two-way ANOVA followed by a Bonferroni's multiple comparison ( $*p<0.05$ ,  $****p<0.0001$ , and ns=not significant).

| Subfigure  | Behavior test                               | Genotype        | Drug                   | # of samples             | Test               | Source of Variation | F-value          | p-value | Post hoc analysis                | Group Comparison         | Mean Diff. | p-value | Significance |
|------------|---------------------------------------------|-----------------|------------------------|--------------------------|--------------------|---------------------|------------------|---------|----------------------------------|--------------------------|------------|---------|--------------|
| Figure 5-c | Fear potentiated startle test (Raw startle) | WT              | SNC80 (20 mg/kg, i.p.) | Control: 21<br>SNC80: 21 | Two-Way ANOVA test | Interaction         | F(2,120) = 20.42 | <0.0001 | Sidak's Multiple Comparison Test | Blank Convs. SNC80       | -0.0126    | 0.9994  | ns           |
|            |                                             |                 |                        |                          |                    | Stimulation factor  | F(2,120) = 92.80 | <0.0001 |                                  | Noise Convs. SNC80       | 0.5079     | <0.0001 | ****         |
|            |                                             |                 |                        |                          |                    | Drug factor         | F(1,120) = 63.99 | <0.0001 |                                  | Noise+Light Convs. SNC80 | 1.0310     | <0.0001 | ****         |
| Figure 5-d | Fear potentiated startle test (FPS testing) | WT              | SNC80 (20 mg/kg, i.p.) | Control: 21<br>SNC80: 20 | Unpaired t test    |                     |                  |         |                                  |                          |            |         |              |
| Figure 5-f | Fear potentiated startle test               | $\beta$ arr2 KO | SNC80 (20 mg/kg, i.p.) | Control: 8<br>SNC80: 8   | Two-Way ANOVA test | Interaction         | F(2,42) = 20.22  | <0.0001 | Sidak's Multiple Comparison Test | Blank Convs. SNC80       | -0.0355    | >0.9999 | ns           |
|            |                                             |                 |                        |                          |                    | Stimulation factor  | F(2,42) = 51.52  | <0.0001 |                                  | Noise Convs. SNC80       | 0.2139     | 0.0103  | *            |
|            |                                             |                 |                        |                          |                    | Drug factor         | F(1,42) = 40.4   | <0.0001 |                                  | Noise+Light Convs. SNC80 | 0.5812     | <0.0001 | ****         |
| Figure 5-g | Fear potentiated startle test (FPS testing) | $\beta$ arr2 KO | SNC80 (20 mg/kg, i.p.) | Control: 8<br>SNC80: 8   | Unpaired t test    |                     |                  |         |                                  |                          |            |         |              |
| Figure 5-i | Fear potentiated startle test               | WT              | TAN67 (25 mg/kg, i.p.) | Control: 8<br>TAN67: 8   | Two-Way ANOVA test | Interaction         | F(2,42) = 0.7245 | 0.4905  | Sidak's Multiple Comparison Test | Blank Convs. SNC80       | -0.0113    | >0.9999 | ns           |
|            |                                             |                 |                        |                          |                    | Stimulation factor  | F(2,42) = 25.06  | <0.0001 |                                  | Noise Convs. SNC80       | 0.1123     | 0.9736  | ns           |
|            |                                             |                 |                        |                          |                    | Drug factor         | F(1,42) = 0.2754 | 0.6025  |                                  | Noise+Light Convs. SNC80 | -0.3664    | 0.5189  | ns           |
| Figure 5-j | Fear potentiated startle test (FPS testing) | WT              | TAN67 (25 mg/kg, i.p.) | Control: 7<br>TAN67: 8   | Unpaired t test    |                     |                  |         |                                  |                          |            |         |              |

4

1 **Table S5. Statistical analysis of ERK1/2 expression levels upon time-series administration of TAN67 in WT mouse and SNC80**  
2 **in  $\beta$ -arrestin 1 KO mouse brain** Statistical differences of ERK1/2 expression levels in WT and  $\beta$ -arrestin 1 KO mouse brain shown in  
3 **Fig. 6.** Significance between groups was calculated by one-way ANOVA followed by a Tukey's multiple comparison ( $*p<0.05$ ,  
4  $**p<0.01$ , and ns=not significant).

| Subfigure  | Brain region        | Genotype        | Drug                 | # of samples | Test               | F-value            | p-value  | Group  | Mean              | Post hoc analysis                | Group Comparison | Mean Diff. | p-value | Significance |
|------------|---------------------|-----------------|----------------------|--------------|--------------------|--------------------|----------|--------|-------------------|----------------------------------|------------------|------------|---------|--------------|
| Figure 6-a | Dorsal Striatum     | WT              | TAN67 (25 mg/kg, Ip) | Conc 7       | One-Way ANOVA test | F (2, 18) = 5.276  | P=0.0157 | Con    | 1                 | Tukey's Multiple Comparison Test | Con vs. 10 min   | 0.1231     | 0.6279  | ns           |
|            |                     |                 |                      | 10 min       |                    |                    |          | 0.8769 | Con vs. 30 min    |                                  | 0.4176           | 0.0142     | *       |              |
|            |                     |                 |                      | 30 min       |                    |                    |          | 0.5824 | 10 min vs. 30 min |                                  | 0.2945           | 0.0931     | ns      |              |
| Figure 6-b | Nucleus Accumbens   | WT              | TAN67 (25 mg/kg, Ip) | Conc 7       | One-Way ANOVA test | F (2, 17) = 5.701  | P=0.0127 | Con    | 1                 | Tukey's Multiple Comparison Test | Con vs. 10 min   | 0.3048     | 0.0447  | *            |
|            |                     |                 |                      | 10 min       |                    |                    |          | 0.6152 | Con vs. 30 min    |                                  | 0.4773           | 0.0161     | *       |              |
|            |                     |                 |                      | 30 min       |                    |                    |          | 0.5227 | 10 min vs. 30 min |                                  | 0.0925           | 0.8190     | ns      |              |
| Figure 6-c | Dorsal Hippocampus  | WT              | TAN67 (25 mg/kg, Ip) | Conc 7       | One-Way ANOVA test | F (2, 18) = 5.09   | P=0.0177 | Con    | 1                 | Tukey's Multiple Comparison Test | Con vs. 10 min   | -0.0207    | 0.9729  | ns           |
|            |                     |                 |                      | 10 min       |                    |                    |          | 1.021  | Con vs. 30 min    |                                  | 0.2640           | 0.0410     | *       |              |
|            |                     |                 |                      | 30 min       |                    |                    |          | 0.739  | 10 min vs. 30 min |                                  | 0.2017           | 0.0266     | *       |              |
| Figure 6-d | Amygdala            | WT              | TAN67 (25 mg/kg, Ip) | Conc 7       | One-Way ANOVA test | F (2, 16) = 5.455  | P=0.0156 | Con    | 1                 | Tukey's Multiple Comparison Test | Con vs. 10 min   | 0.1490     | 0.3276  | ns           |
|            |                     |                 |                      | 10 min       |                    |                    |          | 0.851  | Con vs. 30 min    |                                  | 0.3303           | 0.0188     | *       |              |
|            |                     |                 |                      | 30 min       |                    |                    |          | 0.6697 | 10 min vs. 30 min |                                  | 0.1813           | 0.2189     | ns      |              |
| Figure 6-e | Ventral Hippocampus | WT              | TAN67 (25 mg/kg, Ip) | Conc 6       | One-Way ANOVA test | F (2, 15) = 1.092  | P=0.3607 | Con    | 1                 | Tukey's Multiple Comparison Test | Con vs. 10 min   | -0.0628    | 0.9388  | ns           |
|            |                     |                 |                      | 10 min       |                    |                    |          | 1.063  | Con vs. 30 min    |                                  | 0.1991           | 0.5426     | ns      |              |
|            |                     |                 |                      | 30 min       |                    |                    |          | 0.8009 | 10 min vs. 30 min |                                  | 0.2648           | 0.3682     | ns      |              |
| Figure 6-f | Dorsal Striatum     | $\beta$ arr1 KO | SNC80 (20 mg/kg, Ip) | Conc 7       | One-Way ANOVA test | F (2, 16) = 1.62   | P=0.2288 | Con    | 1                 | Tukey's Multiple Comparison Test | Con vs. 10 min   | -0.1907    | 0.4580  | ns           |
|            |                     |                 |                      | 10 min       |                    |                    |          | 1.191  | Con vs. 30 min    |                                  | -0.2710          | 0.2226     | ns      |              |
|            |                     |                 |                      | 30 min       |                    |                    |          | 1.271  | 10 min vs. 30 min |                                  | 0.0003           | 0.9743     | ns      |              |
| Figure 6-g | Nucleus Accumbens   | $\beta$ arr1 KO | SNC80 (20 mg/kg, Ip) | Conc 7       | One-Way ANOVA test | F (2, 16) = 0.5181 | P=0.6053 | Con    | 1                 | Tukey's Multiple Comparison Test | Con vs. 10 min   | -0.1791    | 0.7426  | ns           |
|            |                     |                 |                      | 10 min       |                    |                    |          | 1.179  | Con vs. 30 min    |                                  | -0.2319          | 0.6122     | ns      |              |
|            |                     |                 |                      | 30 min       |                    |                    |          | 1.232  | 10 min vs. 30 min |                                  | -0.0528          | 0.9759     | ns      |              |
| Figure 6-h | Dorsal Hippocampus  | $\beta$ arr1 KO | SNC80 (20 mg/kg, Ip) | Conc 7       | One-Way ANOVA test | F (2, 16) = 11.48  | P=0.0008 | Con    | 1                 | Tukey's Multiple Comparison Test | Con vs. 10 min   | -1.8120    | 0.0027  | **           |
|            |                     |                 |                      | 10 min       |                    |                    |          | 2.812  | Con vs. 30 min    |                                  | -1.8740          | 0.0020     | **      |              |
|            |                     |                 |                      | 30 min       |                    |                    |          | 2.874  | 10 min vs. 30 min |                                  | 0.0625           | 0.9862     | ns      |              |
| Figure 6-i | Amygdala            | $\beta$ arr1 KO | SNC80 (20 mg/kg, Ip) | Conc 7       | One-Way ANOVA test | F (2, 16) = 4.668  | P=0.0253 | Con    | 1                 | Tukey's Multiple Comparison Test | Con vs. 10 min   | 0.4981     | 0.1880  | ns           |
|            |                     |                 |                      | 10 min       |                    |                    |          | 1.498  | Con vs. 30 min    |                                  | 0.6695           | 0.0261     | *       |              |
|            |                     |                 |                      | 30 min       |                    |                    |          | 1.67   | 10 min vs. 30 min |                                  | -0.1714          | 0.7564     | ns      |              |
| Figure 6-j | Ventral Hippocampus | $\beta$ arr1 KO | SNC80 (20 mg/kg, Ip) | Conc 7       | One-Way ANOVA test | F (2, 16) = 5.097  | P=0.0194 | Con    | 1                 | Tukey's Multiple Comparison Test | Con vs. 10 min   | -1.0240    | 0.0807  | ns           |
|            |                     |                 |                      | 10 min       |                    |                    |          | 2.024  | Con vs. 30 min    |                                  | -1.3770          | 0.0201     | *       |              |
|            |                     |                 |                      | 30 min       |                    |                    |          | 2.377  | 10 min vs. 30 min |                                  | 0.3530           | 0.7372     | ns      |              |

- 1 **Table S6. Antibody information for the Western blot** Lists of primary and secondary antibodies
- 2 that were used in the study were included in the table.

| <i>Name of primary antibody</i>                              | <i>Company</i>                                 | <i>Molecular Weight (kDa)</i> | <i>Source</i> | <i>Dilution ratio</i>        | <i>Catalog number</i> | <i>Lot number</i> |
|--------------------------------------------------------------|------------------------------------------------|-------------------------------|---------------|------------------------------|-----------------------|-------------------|
| p44/42 MAPK (Erk1/2) (L34F12)                                | Cell Signaling, MA                             | 42, 44                        | Mouse         | 1:2,000 for WB; 1:250 for IF | 4696S                 | 22                |
| phospho-ERK1/2 (Tyr 204)                                     | Santa Cruz Biotechnology, Dallas, TX           | 42, 44                        | Rabbit        | 1:2,000 for WB               | 7976-R                | C1113             |
| Phospho-p44/42 MAPK (Erk1/2) (Thr202/Tyr204) (D13.14.4E) XP® | Cell Signaling, MA                             | 42, 44                        | Rabbit        | 1:2,000 for WB; 1:200 for IF | 4370S                 | 24                |
| p38 MAPK (D13E1) XP®                                         | Cell Signaling, MA                             | 38                            | Rabbit        | 1:2,000                      | 8690S                 | 6                 |
| Phospho-p38 MAPK (Thr180/Tyr182)                             | Cell Signaling, MA                             | 38                            | Rabbit        | 1:2,000                      | 9211S                 | 23                |
| JNK (D-2)                                                    | Santa Cruz Biotechnology, Dallas, TX           | 46, 54                        | Mouse         | 1:2,000                      | 7345                  | L3015             |
| p-JNK (G-7)                                                  | Santa Cruz Biotechnology, Dallas, TX           | 46, 54                        | Mouse         | 1:2,000                      | 6254                  | B2117             |
| $\alpha$ -Tubulin                                            | Santa Cruz Biotechnology, Dallas, TX           | 50                            | Mouse         | 1:2,000                      | 5286                  | G3117             |
| <i>Name of secondary antibody</i>                            | <i>Company</i>                                 | <i>Molecular Weight (kDa)</i> | <i>Source</i> | <i>Dilution ratio</i>        | <i>Catalog number</i> | <i>Lot number</i> |
| IRDye® 680LT                                                 | Li-Cor, Lincoln, NE                            | -                             | Mouse         | 1:5,000                      | 926-68020             | 60824-02          |
| IRDye® 800CW                                                 | Li-Cor, Lincoln, NE                            | -                             | Rabbit        | 1:5,000                      | 926-32211             | C61103-06         |
| Alexa fluor 594 Goat Anti-Rabbit IgG (H+L) Antibody          | Life Technologies (Thermo Fisher), Waltham, MA | -                             | Rabbit        | 1:1,000                      | A-11012               | -                 |
| Alexa Fluor 488 Goat Anti-Mouse IgG (H+L) Antibody           | Life Technologies (Thermo Fisher), Waltham, MA | -                             | Mouse         | 1:1,000                      | A11001                | -                 |

3



1

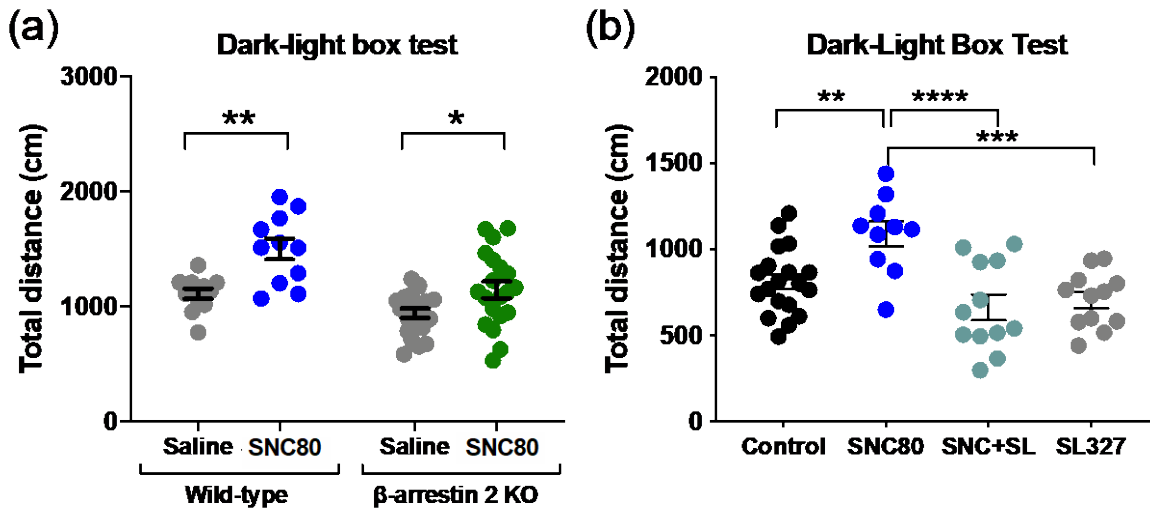

2 **Figure S1. Locomotor effects of drug/vehicle treatment in the WT or  $\beta$ -arrestin 2 KO mice**  
3 **in the dark light upon administration of drugs (a)** Traveled distance of WT (control: n=12,  
4 SNC80: n=11) and  $\beta$ -arrestin 2 KO mice (control: n=20, SNC80: n=20) upon administration of  
5 SNC80 (20 mg/kg, i.p.) the dark light box test shown in **Fig. 1e,g.** (b) Traveled distance of WT  
6 mice upon administration of SNC80 (20 mg/kg, i.p. / control: n=8, SNC80: n=12, SNC+SL: n=12,  
7 SL327: n=12) in presence or absence of 50 mg/kg SL327 in dark light box test shown in **Fig. 4b.**  
8 SNC80-induced hyperlocomotion corresponds with a previous report (11). (For (a), Significance  
9 was calculated by two-way ANOVA  $F_{1,59}=1.949$ ,  $p=0.1670$ , WT  $p=0.0011$ ,  $\beta$ -arrestin 2 KO  
10  $p=0.0283$  after Sidak's multiple comparison; for (b), one-way ANOVA  $F_{3,49}=9.037$ ,  $p<0.001$ ,  
11 control vs. SNC80  $p=0.007$ , SNC80 vs. SNC+SL  $p<0.0001$ , SNC+SL vs. SL327  $p<0.0004$   
12 followed by a Tukey's multiple comparison; \* $p<0.05$ , \*\* $p<0.01$ , \*\*\* $p<0.001$ , \*\*\*\* $p<0.0001$ ; all  
13 values are shown as individual data points  $\pm$  S.E.M.).

14

1

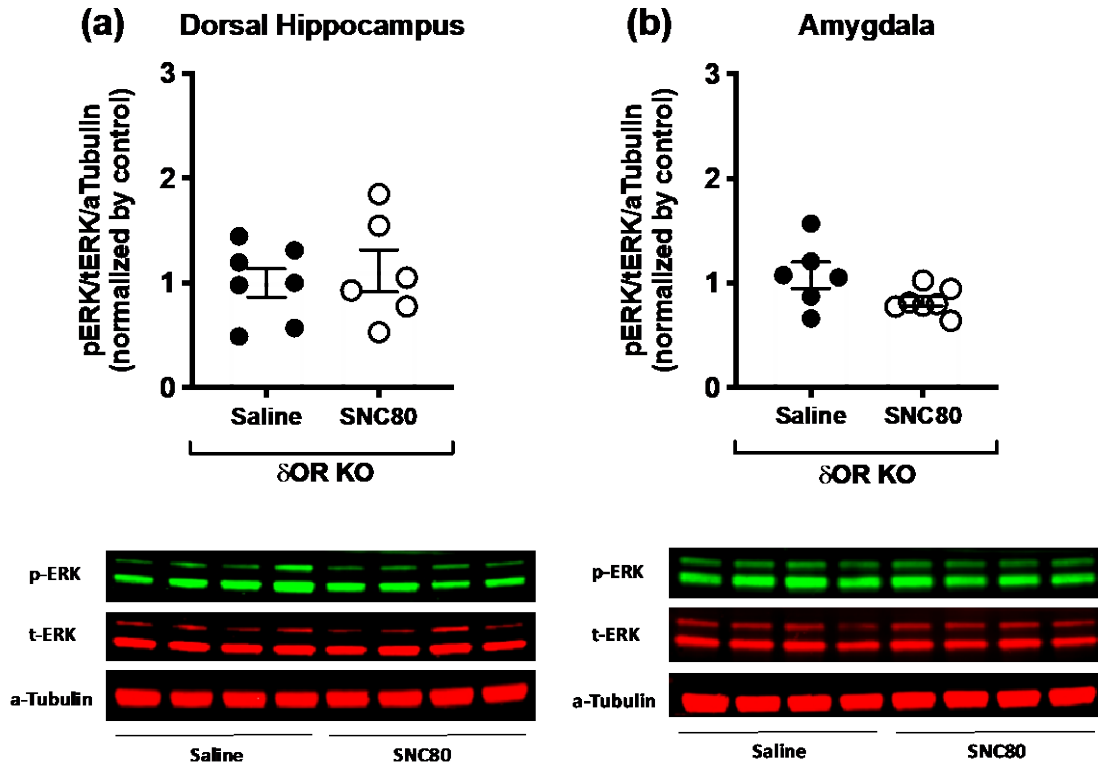

2 **Figure S2. SNC80 does not activate ERK1/2 in the dorsal hippocampus and the amygdala of**  
3  **$\delta$ OR KO mice (a, b) Unlike Fig. 2g,h, systemic administration of SNC80 (20 mg/kg, i.p.) 10**  
4 **minutes prior to the brain tissue collections did not affect ERK1/2 activation profile in the dorsal**  
5 **hippocampus (Saline: n=8, SNC80: n=7) and the amygdala (Saline: n=7, SNC80: n=8) of  $\delta$ OR**  
6 **KO mice.**

7

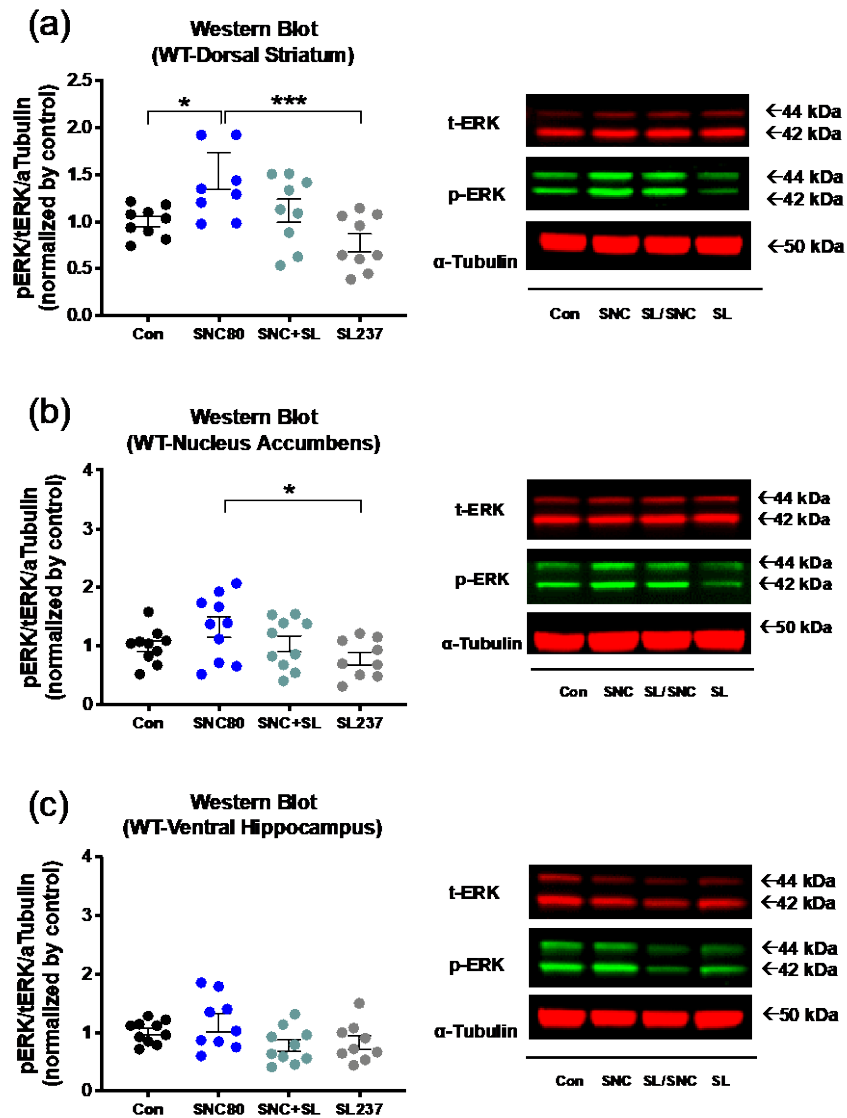

2 **Figure S3. SNC80-induced ERK1/2 activation is partly affected by SL327 in the striatal**  
 3 **regions of the brain** SL327 (50 mg/kg, s.c.) attenuated SNC80 (20 mg/kg, i.p.)-induced ERK1/2  
 4 phosphorylation in the striatum similar to **Fig. 4c,d (a)** and similar trends were observed in the  
 5 nucleus accumbens **(b)**. **(c)** Yet, no change was observed in the ventral hippocampus similar to  
 6 **Fig. 2i**. The number of samples is listed in **Table S3**. (Significance was calculated by one-way  
 7 ANOVA followed by a Sidak's or Tukey's multiple comparison; \* $p < 0.05$ , \*\*\* $p < 0.001$ ; all values

- 1 are shown as individual data points  $\pm$  S.E.M.; SNC+SL means SNC80+SL327 and SL means
- 2 SL327).

1

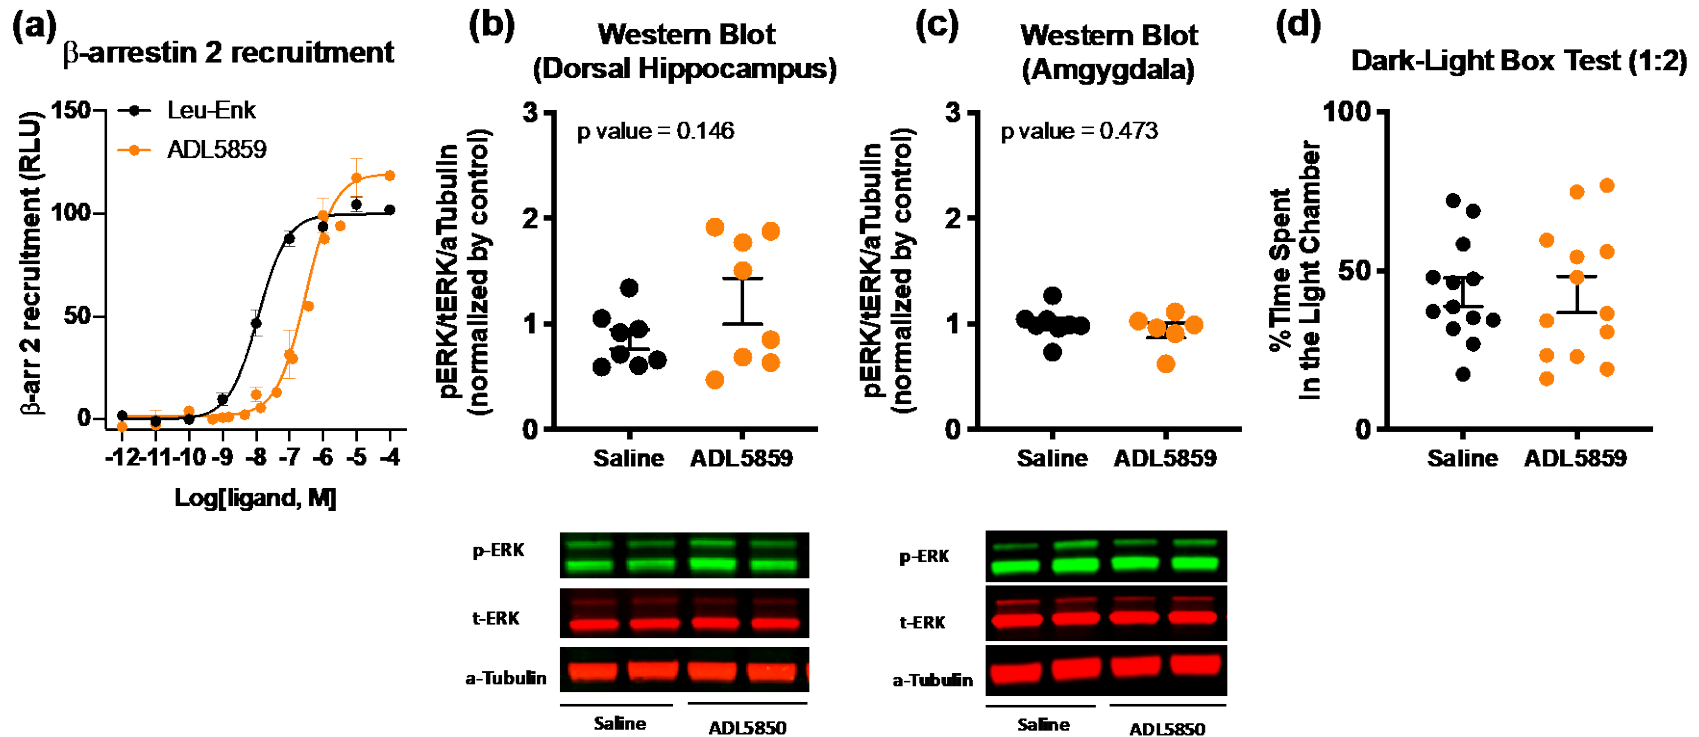

2 **Figure S4. A  $\delta$ OR agonist, ADL5859, does not affect ERK1/2 activity and anxiety-like behaviors of WT mice** (a) Dose-dependent  
3  $\beta$ -arrestin 2 recruitent levels by ADL5859 and leucine-enkephalin (leu-enk) were evaluated using cellular assays in CHO- $\delta$ OR- $\beta$ arr2  
4 cells (All recruitent levels were normalized by leu-enk and leu-enk was normalized as 100 %). (b, c) Systemic administration of  
5 ADL5859 (30 mg/kg, p.o.) did not affect ERK1/2 activation profile in the dorsal hippocampus (Saline: n=8, SNC80: n=8) and the  
6 amygdala (Saline: n=8, SNC80: n=6) of WT mice. ADL5859 was administered 10 minutes prior to the brain tissue collection. (d) No

- 1 changes in anxiety-like behaviors in the dark/light box test were observed by systemic administration of ADL5859 (30 mg/kg, p.o.)
- 2 (Saline: n=13, SNC80: n=13). ADL5859 was administered 30 minutes prior to the behavior testing.

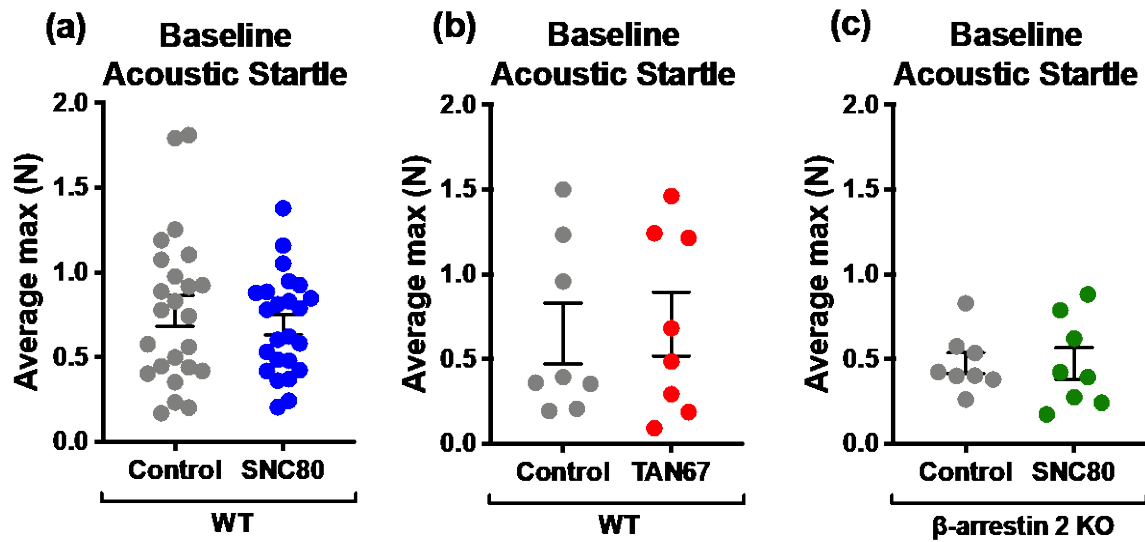

**Figure S5.** Mice groups for FPS tests were counterbalanced based on baseline acoustic startle response (a) No significance was observed between groups of control vs. SNC80 (Control: n=24, SNC80: n=24) (b) or control vs. TAN67 (Control: n=8, TAN67: n=8) of WT mice. (b) Also no significance was observed between control vs. SNC80 of  $\beta$ -arrestin 2 KO mice (Control: n=8, SNC80: n=8). All values are shown as individual data points  $\pm$  S.E.M.

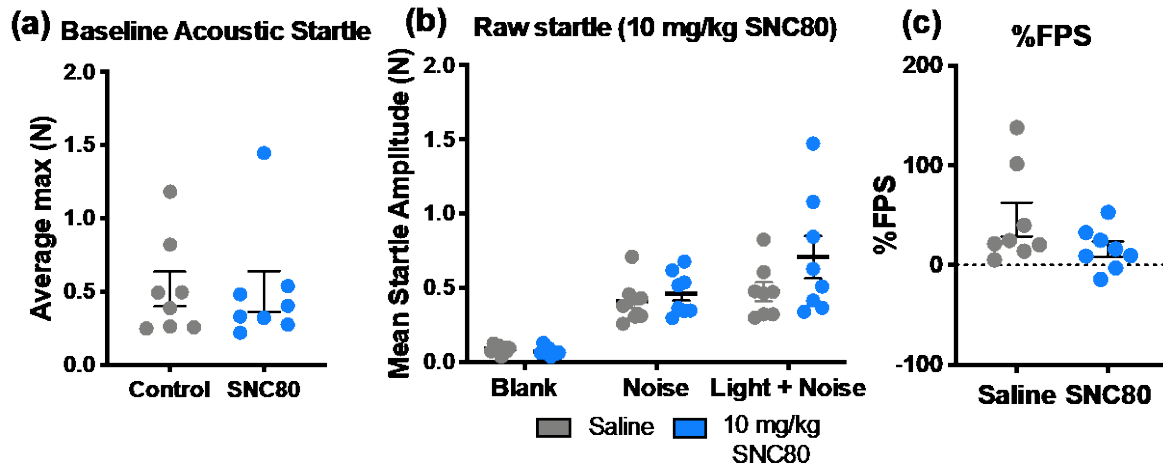

**Figure S6. A low dose SNC80 does not affect fear-related behavior of WT mice** Fear potentiated startle responses were evaluated upon administration of SNC80 (10 mg/kg, i.p.) in WT mice (Saline: n=8, SNC80: n=8). SNC80 was administered 30 minutes prior to the testing. **(a)** Prior to the testing, mice were measured with baseline acoustic startle and no difference was observed between groups (no drugs were administered for this period). **(b)** 10 mg/kg SNC80 did not affect the raw startle response to either ‘noise’ alone or ‘light+noise’ condition. **(c)** 10 mg/kg SNC80 also did not affect %FPS.

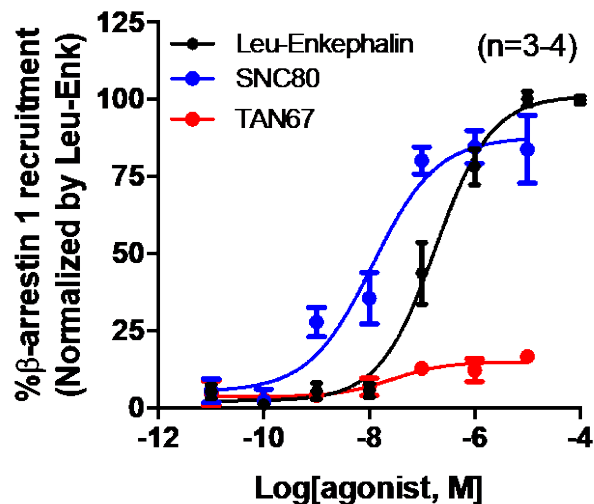



**Figure S7.  $\beta$ -arrestin 1 recruitment levels by G-protein-biased (TAN67),  $\beta$ -arrestin-biased (SNC80), and non-biased (Leu-Enk)  $\delta$ OR agonist in U2OS- $\delta$ OR- $\beta$ Arr1 cells** Dose-dependent  $\beta$ -arrestin 1 recruitment levels by TAN67 (n=3), SNC80 (n=3), and Leu-enkephalin (n=4) were evaluated using the cellular assay in U2OS- $\delta$ OR- $\beta$ Arr1 cells. SNC80 revealed the highest efficacy of recruitment and TAN67 showed the lowest. (All recruitment levels were normalized by leu-enk and leu-enk was normalized as 100 %).

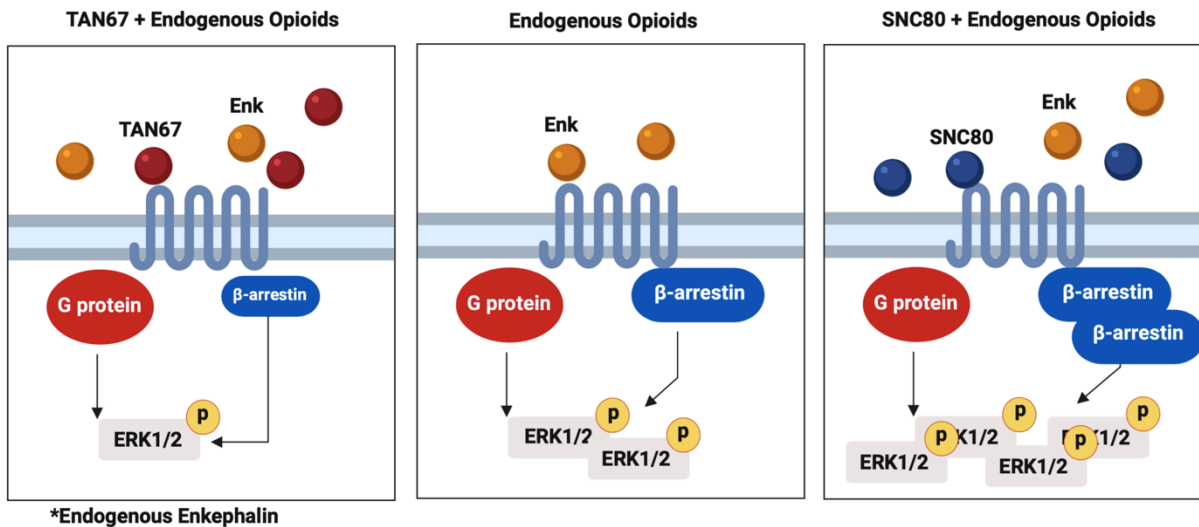

**Figure S8. A diagram representing the pharmacological competition between two biased agonists and an endogenous opioid in relations to their ability to modulate ERK1/2 signaling** Unlike with cells, the brain has endogenous opioids that bind to  $\delta$ OR. As endogenous opioids such as Leu-Enk, an analog of endogenous opioids, have better ability to recruit  $\beta$ -arrestin proteins than TAN67 as shown in [Fig. S7](#),  $\delta$ OR is less likely to recruit  $\beta$ -arrestin and potentially activate less ERK1/2 upon administration of TAN67 in the brain. Likewise, SNC80, which has a better ability to recruits  $\beta$ -arrestin proteins than Leu-Enk, recruits more  $\beta$ -arrestins via  $\delta$ OR and potentially activates more ERK1/2 upon administration of SNC80 in the brain (Right). Yet, it is noteworthy that SNC80 and TAN67 have comparable levels of G protein-mediated response (14).
